# Supplementary material for: The impact of social distancing on COVID19 spread: State of Georgia case study
Source: PLoS One. 2020 Oct 12;15(10):e0239798. doi: 10.1371/journal.pone.0239798 (PMC7549801; doi:10.1371/journal.pone.0239798)
Supplement: S2 Dataset — The number of people that need hospital beds, ICU beds, and ventilators is recorded for each hospital region under NI. (XLSX) [file pone.0239798.s006.xlsx]

## Sheet: Sheet1
Date	Region	Curr_Hosp	Curr_Vent	Curr_ICU
2020-02-18	A	0	0	0
2020-02-19	A	0	0	0
2020-02-20	A	0	0	0
2020-02-21	A	0.333333	0.07488	0.117
2020-02-22	A	0.285714	0.0624	0.102375
2020-02-23	A	0.578231	0.115787	0.189245
2020-02-24	A	0.82896	0.160276	0.265256
2020-02-25	A	1.71054	0.34711	0.565766
2020-02-26	A	1.46617	0.289258	0.495045
2020-02-27	A	1.25672	0.241048	0.433164
2020-02-28	A	1.41052	0.26466	0.478685
2020-02-29	A	2.20902	0.434097	0.752516
2020-03-01	A	1.89345	0.361747	0.658452
2020-03-02	A	3.62295	0.684176	1.17415
2020-03-03	A	5.10539	0.952867	1.62538
2020-03-04	A	5.70938	1.0603	1.83821
2020-03-05	A	6.56042	1.21361	2.1241
2020-03-06	A	6.28989	1.13891	2.05792
2020-03-07	A	7.058	1.29021	2.33368
2020-03-08	A	9.04971	1.67144	2.97363
2020-03-09	A	10.0902	1.86156	3.33426
2020-03-10	A	12.6488	2.32784	4.13081
2020-03-11	A	15.1751	2.76909	4.91013
2020-03-12	A	19.0073	3.50011	6.1597
2020-03-13	A	19.9586	3.66278	6.5554
2020-03-14	A	26.1074	4.83003	8.51364
2020-03-15	A	28.0444	5.0151	8.99644
2020-03-16	A	29.7047	5.26363	9.56622
2020-03-17	A	33.1279	5.81185	10.5978
2020-03-18	A	37.062	6.56822	11.9684
2020-03-19	A	41.7674	7.46477	13.5837
2020-03-20	A	46.4673	8.21189	14.997
2020-03-21	A	53.4958	9.56111	17.3691
2020-03-22	A	61.8535	11.0432	20.0036
2020-03-23	A	70.0173	12.5584	22.7465
2020-03-24	A	80.6815	14.2121	25.7575
2020-03-25	A	93.4889	16.6136	29.9912
2020-03-26	A	108.133	19.2332	34.6619
2020-03-27	A	124.352	22.2122	39.9925
2020-03-28	A	138.254	24.4729	44.3101
2020-03-29	A	154.504	27.3163	49.5874
2020-03-30	A	164.765	28.8427	52.8876
2020-03-31	A	184.561	32.4527	59.4283
2020-04-01	A	212.528	37.0944	67.7038
2020-04-02	A	232.167	40.4412	74.1301
2020-04-03	A	261	45.7955	83.7615
2020-04-04	A	292.715	51.1116	93.5237
2020-04-05	A	321.565	55.7913	102.456
2020-04-06	A	352.627	61.197	112.624
2020-04-07	A	385.585	67.0551	123.636
2020-04-08	A	421.835	73.5287	135.759
2020-04-09	A	469.906	81.963	151.116
2020-04-10	A	527.777	92.167	169.514
2020-04-11	A	576.047	100.687	185.64
2020-04-12	A	622.088	108.264	200.494
2020-04-13	A	671.885	116.861	217.058
2020-04-14	A	719.568	125.045	233.147
2020-04-15	A	770.439	133.366	249.568
2020-04-16	A	833.71	144.268	270.138
2020-04-17	A	895.608	154.472	289.883
2020-04-18	A	963.664	166.821	313.171
2020-04-19	A	1021	175.828	331.541
2020-04-20	A	1063.14	182.607	346.479
2020-04-21	A	1132.26	194.336	369.049
2020-04-22	A	1166.18	200.096	382.527
2020-04-23	A	1198.58	205.521	395.296
2020-04-24	A	1232.69	211.131	408.171
2020-04-25	A	1278.26	219.115	424.607
2020-04-26	A	1326.65	227.873	442.277
2020-04-27	A	1348.79	230.884	451.039
2020-04-28	A	1373.78	234.544	460.504
2020-04-29	A	1385.52	235.52	465.545
2020-04-30	A	1408.59	239.084	474.254
2020-05-01	A	1408.7	238.21	475.868
2020-05-02	A	1385.79	233.406	470.911
2020-05-03	A	1370.48	230.203	467.826
2020-05-04	A	1350.7	225.973	462.687
2020-05-05	A	1339.08	223.69	460.131
2020-05-06	A	1316.11	218.867	453.332
2020-05-07	A	1285.76	213.196	444.8
2020-05-08	A	1255.08	207.568	435.927
2020-05-09	A	1221.45	201.469	425.961
2020-05-10	A	1182.29	194.135	413.722
2020-05-11	A	1144.73	187.632	402.402
2020-05-12	A	1091.19	177.987	385.893
2020-05-13	A	1050.31	170.833	372.83
2020-05-14	A	1000.93	161.899	356.755
2020-05-15	A	950.942	152.982	340.388
2020-05-16	A	903.76	145.131	325.412
2020-05-17	A	866.318	138.947	312.868
2020-05-18	A	815.558	130.011	295.981
2020-05-19	A	781.716	124.522	284.264
2020-05-20	A	736.043	116.637	268.837
2020-05-21	A	691.894	109.286	254.122
2020-05-22	A	652.385	102.47	240.167
2020-05-23	A	609.187	95.1929	225.46
2020-05-24	A	569.827	88.9703	212.344
2020-05-25	A	518.757	79.9992	194.953
2020-05-26	A	483.982	74.3564	182.6
2020-05-27	A	447.842	68.6363	170.201
2020-05-28	A	413.198	62.9793	157.961
2020-05-29	A	385.503	58.7505	148.009
2020-05-30	A	360.431	54.9686	138.899
2020-05-31	A	335.274	50.9212	129.527
2020-06-01	A	310.711	46.916	120.339
2020-06-02	A	286.99	43.082	111.523
2020-06-03	A	265.992	39.8758	103.793
2020-06-04	A	246.993	36.96	96.6469
2020-06-05	A	231.042	34.6605	90.598
2020-06-06	A	214.369	32.2311	84.5036
2020-06-07	A	198.412	29.713	78.3996
2020-06-08	A	182.4	27.0184	72.127
2020-06-09	A	163.677	24.0074	65.4425
2020-06-10	A	149.294	21.7949	60.0572
2020-06-11	A	139.633	20.3367	55.9473
2020-06-12	A	129.685	18.9413	52.0696
2020-06-13	A	118.159	17.1378	47.6756
2020-06-14	A	104.612	14.8778	42.6478
2020-06-15	A	94.6678	13.3355	38.7815
2020-06-16	A	85.4772	12.0087	35.3335
2020-06-17	A	79.5995	11.2747	32.8971
2020-06-18	A	75.2282	10.846	31.0513
2020-06-19	A	67.8146	9.7095	28.2186
2020-06-20	A	62.7935	8.95376	26.0389
2020-06-21	A	57.823	8.28238	24.0667
2020-06-22	A	52.5626	7.52043	22.0247
2020-06-23	A	48.7203	7.02414	20.4546
2020-06-24	A	44.0936	6.24727	18.5131
2020-06-25	A	39.4612	5.54718	16.732
2020-06-26	A	37.4905	5.37977	15.8235
2020-06-27	A	34.1347	4.91023	14.5129
2020-06-28	A	30.5917	4.3581	13.1148
2020-06-29	A	29.2214	4.22802	12.4071
2020-06-30	A	27.0469	3.92825	11.4889
2020-07-01	A	25.5164	3.74224	10.7851
2020-07-02	A	23.2046	3.37368	9.83563
2020-07-03	A	22.2229	3.2274	9.25617
2020-07-04	A	19.7149	2.81707	8.29848
2020-07-05	A	18.2318	2.6138	7.67717
2020-07-06	A	16.6273	2.38062	7.03386
2020-07-07	A	14.9186	2.12252	6.37129
2020-07-08	A	13.454	1.83255	5.67455
2020-07-09	A	12.8654	1.80446	5.39856
2020-07-10	A	12.6941	1.85593	5.27407
2020-07-11	A	11.5473	1.68527	4.83148
2020-07-12	A	10.5644	1.55415	4.46155
2020-07-13	A	9.38852	1.35891	4.00352
2020-07-14	A	9.04731	1.33488	3.81941
2020-07-15	A	8.75484	1.31486	3.65832
2020-07-16	A	7.83748	1.17059	3.31803
2020-07-17	A	7.05117	1.03928	3.00294
2020-07-18	A	6.3772	0.929855	2.72724
2020-07-19	A	5.46617	0.774879	2.38634
2020-07-20	A	5.01863	0.70952	2.18771
2020-07-21	A	4.30168	0.591267	1.91425
2020-07-22	A	4.35383	0.620296	1.8743
2020-07-23	A	4.39852	0.65558	1.85668
2020-07-24	A	4.43682	0.684982	1.84126
2020-07-25	A	4.13632	0.634606	1.71077
2020-07-26	A	3.87876	0.592626	1.59659
2020-07-27	A	3.32465	0.493855	1.39702
2020-07-28	A	2.8497	0.411546	1.22239
2020-07-29	A	2.77593	0.417835	1.18659
2020-07-30	A	2.37937	0.348196	1.03827
2020-07-31	A	2.37279	0.365043	1.02548
2020-08-01	A	2.36716	0.367989	0.996966
2020-08-02	A	2.02899	0.306658	0.872345
2020-08-03	A	1.73914	0.255548	0.763302
2020-08-04	A	1.82402	0.287837	0.784889
2020-08-05	A	1.56345	0.239864	0.686778
2020-08-06	A	1.67343	0.274767	0.717931
2020-08-07	A	1.76771	0.29276	0.727857
2020-08-08	A	1.51518	0.243966	0.636875
2020-08-09	A	1.63206	0.278185	0.674266
2020-08-10	A	1.73224	0.306701	0.706982
2020-08-11	A	1.81811	0.330464	0.735609
2020-08-12	A	1.55838	0.275387	0.643658
2020-08-13	A	2.00242	0.379249	0.797201
2020-08-14	A	2.38302	0.443613	0.896882
2020-08-15	A	2.37592	0.444557	0.901772
2020-08-16	A	2.70317	0.509132	1.00572
2020-08-17	A	2.31701	0.424276	0.880003
2020-08-18	A	1.986	0.353564	0.770003
2020-08-19	A	1.70229	0.294636	0.673752
2020-08-20	A	1.79243	0.309316	0.689198
2020-08-21	A	2.20304	0.39643	0.819715
2020-08-22	A	1.88832	0.330358	0.717251
2020-08-23	A	1.9519	0.339086	0.727262
2020-08-24	A	1.67305	0.282572	0.636355
2020-08-25	A	1.76738	0.299264	0.656478
2020-08-26	A	1.84824	0.313174	0.674086
2020-08-27	A	1.91754	0.335858	0.706826
2020-08-28	A	1.6436	0.279882	0.618472
2020-08-29	A	1.74214	0.297022	0.640831
2020-08-30	A	1.8266	0.322399	0.677728
2020-08-31	A	1.56566	0.268666	0.593012
2020-09-01	A	1.34199	0.223888	0.518886
2020-09-02	A	1.15028	0.186574	0.454025
2020-09-03	A	0.985953	0.155478	0.397272
2020-09-04	A	0.845102	0.129565	0.347613
2020-09-05	A	0.724373	0.107971	0.304161
2020-09-06	A	0.954224	0.164856	0.383141
2020-09-07	A	1.15124	0.201167	0.434916
2020-09-08	A	1.32011	0.231425	0.480217
2020-09-09	A	1.46485	0.25664	0.519855
2020-09-10	A	1.25559	0.213867	0.454873
2020-09-11	A	1.07622	0.178222	0.398014
2020-09-12	A	0.922471	0.148518	0.348262
2020-09-13	A	0.79069	0.123765	0.304729
2020-09-14	A	1.01107	0.178018	0.383639
2020-09-15	A	1.5333	0.298108	0.569684
2020-09-16	A	1.31425	0.248424	0.498473
2020-09-17	A	1.1265	0.20702	0.436164
2020-09-18	A	0.965575	0.172516	0.381644
2020-09-19	A	2.16097	0.421096	0.767271
2020-09-20	A	2.18559	0.425794	0.788362
2020-09-21	A	1.87336	0.354828	0.689816
2020-09-22	A	1.60574	0.29569	0.603589
2020-09-23	A	1.37635	0.246408	0.528141
2020-09-24	A	1.51306	0.269128	0.561791
2020-09-25	A	1.29691	0.224273	0.491567
2020-09-26	A	1.11164	0.186894	0.430121
2020-09-27	A	1.28617	0.219532	0.476023
2020-09-28	A	2.10242	0.385395	0.732851
2020-09-29	A	2.13541	0.396043	0.758245
2020-09-30	A	1.83035	0.330036	0.663464
2020-02-18	B	0	0	0
2020-02-19	B	0.333333	0.0637867	0.0996667
2020-02-20	B	0.285714	0.0531556	0.0872083
2020-02-21	B	0.244898	0.0442963	0.0763073
2020-02-22	B	0.876579	0.164487	0.266102
2020-02-23	B	1.08469	0.200859	0.332506
2020-02-24	B	0.929732	0.167383	0.290943
2020-02-25	B	1.13025	0.214365	0.371575
2020-02-26	B	1.30212	0.242425	0.424795
2020-02-27	B	1.78277	0.340687	0.588362
2020-02-28	B	2.52809	0.475266	0.813817
2020-02-29	B	2.8336	0.523628	0.911423
2020-03-01	B	3.4288	0.56393	0.996829
2020-03-02	B	5.60564	0.916449	1.56989
2020-03-03	B	6.4715	1.09373	1.88932
2020-03-04	B	7.547	1.31635	2.28582
2020-03-05	B	7.13552	1.23563	2.21676
2020-03-06	B	8.11616	1.44569	2.58967
2020-03-07	B	8.62338	1.53477	2.78163
2020-03-08	B	10.0581	1.82255	3.28326
2020-03-09	B	10.9546	1.98748	3.60518
2020-03-10	B	13.3896	2.44386	4.3852
2020-03-11	B	15.8102	2.89906	5.18472
2020-03-12	B	17.2182	3.18409	5.73696
2020-03-13	B	20.7585	3.84595	6.88317
2020-03-14	B	26.4597	4.7913	8.50144
2020-03-15	B	32.6797	5.9951	10.5674
2020-03-16	B	36.0112	6.4741	11.5562
2020-03-17	B	38.2001	6.84276	12.3736
2020-03-18	B	43.7429	7.72406	13.9859
2020-03-19	B	52.4939	9.34595	16.7834
2020-03-20	B	63.6615	11.3853	20.3058
2020-03-21	B	71.2336	12.641	22.6946
2020-03-22	B	79.3907	13.9842	25.2484
2020-03-23	B	89.0492	15.6055	28.2674
2020-03-24	B	97.9946	17.1452	31.2036
2020-03-25	B	112.662	19.8898	36.0565
2020-03-26	B	122.567	21.589	39.3841
2020-03-27	B	143.058	25.2958	45.8751
2020-03-28	B	163.288	28.8424	52.2697
2020-03-29	B	183.627	32.3498	58.7273
2020-03-30	B	206.062	36.124	65.7081
2020-03-31	B	230.291	39.9293	72.8476
2020-04-01	B	258.392	45	82.0629
2020-04-02	B	282.812	49.2229	90.1221
2020-04-03	B	312.077	54.6833	100.207
2020-04-04	B	341.828	59.7439	109.829
2020-04-05	B	378.662	65.9607	121.372
2020-04-06	B	402.568	70.0764	129.809
2020-04-07	B	445.058	77.7937	143.89
2020-04-08	B	484.812	84.527	156.683
2020-04-09	B	538.886	94.3315	174.43
2020-04-10	B	583.236	101.95	189.095
2020-04-11	B	639.583	111.868	207.505
2020-04-12	B	693.547	120.738	224.558
2020-04-13	B	759.136	132.569	246.417
2020-04-14	B	819.354	142.781	266.094
2020-04-15	B	878.304	152.061	284.515
2020-04-16	B	938.832	162.522	304.894
2020-04-17	B	977.38	168.548	318.523
2020-04-18	B	1021.42	175.479	333.429
2020-04-19	B	1074.5	184.002	350.766
2020-04-20	B	1132.67	194.619	371.426
2020-04-21	B	1177.86	201.658	386.678
2020-04-22	B	1203.26	204.906	395.934
2020-04-23	B	1250.37	213.306	412.928
2020-04-24	B	1282.74	218.562	425.073
2020-04-25	B	1303.83	221.741	433.823
2020-04-26	B	1336.57	226.6	444.933
2020-04-27	B	1350.96	229.061	452.172
2020-04-28	B	1357.63	229.849	456.533
2020-04-29	B	1351.02	228.23	456.792
2020-04-30	B	1349.02	227.845	458.527
2020-05-01	B	1322.97	222.127	451.612
2020-05-02	B	1311.3	219.612	449.076
2020-05-03	B	1275.64	212.033	438.29
2020-05-04	B	1250.74	207.32	431.357
2020-05-05	B	1234.06	204.699	427.331
2020-05-06	B	1202.77	199.065	418.418
2020-05-07	B	1168.28	192.971	408.435
2020-05-08	B	1121.38	184.23	393.976
2020-05-09	B	1073.52	175.471	379.018
2020-05-10	B	1036.82	169.424	367.889
2020-05-11	B	988.373	160.722	352.427
2020-05-12	B	929.844	149.996	333.468
2020-05-13	B	891.676	143.985	321.455
2020-05-14	B	845.293	136.084	306.424
2020-05-15	B	797.87	127.853	290.697
2020-05-16	B	751.222	119.861	275.169
2020-05-17	B	699.238	110.784	257.803
2020-05-18	B	660.014	104.284	244.271
2020-05-19	B	626.059	98.6567	232.102
2020-05-20	B	583.956	91.5267	217.641
2020-05-21	B	547.867	85.6517	205.091
2020-05-22	B	518.6	80.8889	194.318
2020-05-23	B	486.514	75.7385	183.046
2020-05-24	B	451.346	69.9684	170.873
2020-05-25	B	422.201	65.3512	160.52
2020-05-26	B	397.553	61.731	151.817
2020-05-27	B	367.76	56.8256	141.251
2020-05-28	B	337.223	51.8225	130.576
2020-05-29	B	315.048	48.4603	122.496
2020-05-30	B	292.708	45.0317	114.446
2020-05-31	B	268.892	40.9237	105.449
2020-06-01	B	247.813	37.4477	97.4938
2020-06-02	B	230.077	34.7425	90.8321
2020-06-03	B	210.543	31.681	83.7421
2020-06-04	B	193.798	29.0216	77.3693
2020-06-05	B	180.113	26.9664	72.0445
2020-06-06	B	166.716	24.9347	66.8869
2020-06-07	B	155.566	23.2721	62.4217
2020-06-08	B	143.009	21.3986	57.752
2020-06-09	B	131.579	19.5904	53.2803
2020-06-10	B	118.449	17.4763	48.4186
2020-06-11	B	109.194	16.0556	44.6976
2020-06-12	B	100.595	14.8301	41.3768
2020-06-13	B	91.2243	13.318	37.704
2020-06-14	B	86.1922	12.6653	35.4393
2020-06-15	B	77.8791	11.3975	32.3268
2020-06-16	B	72.0868	10.6072	30.0192
2020-06-17	B	66.7887	9.81836	27.7965
2020-06-18	B	63.5808	9.3329	26.1203
2020-06-19	B	58.1645	8.53454	24.0382
2020-06-20	B	53.1886	7.64459	21.8655
2020-06-21	B	48.9235	7.03054	20.1636
2020-06-22	B	44.2678	6.27479	18.2932
2020-06-23	B	40.2772	5.71987	16.7735
2020-06-24	B	36.1899	5.11877	15.2272
2020-06-25	B	32.6866	4.58458	13.8221
2020-06-26	B	29.0171	4.03403	12.428
2020-06-27	B	26.8718	3.7666	11.5072
2020-06-28	B	24.033	3.35238	10.4024
2020-06-29	B	23.5997	3.37882	10.0165
2020-06-30	B	21.2283	3.04033	9.11541
2020-07-01	B	20.1957	2.93851	8.60865
2020-07-02	B	18.9773	2.77879	8.04824
2020-07-03	B	17.2662	2.5292	7.37588
2020-07-04	B	15.4663	2.23524	6.65322
2020-07-05	B	14.9235	2.20382	6.35457
2020-07-06	B	13.1249	1.9114	5.67725
2020-07-07	B	12.5833	1.85907	5.3836
2020-07-08	B	11.4523	1.68789	4.92731
2020-07-09	B	11.4829	1.73661	4.82706
2020-07-10	B	10.1759	1.52205	4.34068
2020-07-11	B	9.38882	1.40704	4.01476
2020-07-12	B	8.3809	1.23632	3.61258
2020-07-13	B	8.51696	1.23272	3.47735
2020-07-14	B	7.63358	1.09105	3.14234
2020-07-15	B	6.54307	0.909212	2.74955
2020-07-16	B	7.60835	1.10989	2.95619
2020-07-17	B	6.85478	0.99979	2.70367
2020-07-18	B	6.54219	0.971825	2.58238
2020-07-19	B	6.60759	1.03449	2.61058
2020-07-20	B	5.66365	0.862079	2.28426
2020-07-21	B	5.85456	0.931945	2.33239
2020-07-22	B	5.35153	0.776621	2.04084
2020-07-23	B	4.58702	0.647184	1.78574
2020-07-24	B	4.5984	0.68908	1.79652
2020-07-25	B	4.94148	0.765593	1.87095
2020-07-26	B	4.23556	0.637994	1.63709
2020-07-27	B	4.96381	0.808994	1.86578
2020-07-28	B	4.58802	0.737948	1.73223
2020-07-29	B	3.93259	0.614957	1.5157
2020-07-30	B	3.37079	0.512464	1.32623
2020-07-31	B	2.88925	0.427053	1.16046
2020-08-01	B	3.14317	0.505638	1.2494
2020-08-02	B	2.69414	0.421365	1.09322
2020-08-03	B	2.97593	0.478711	1.1559
2020-08-04	B	3.21746	0.537591	1.22808
2020-08-05	B	3.42449	0.575566	1.2739
2020-08-06	B	3.26861	0.554518	1.23167
2020-08-07	B	3.135	0.525886	1.17738
2020-08-08	B	3.02048	0.513118	1.1472
2020-08-09	B	2.92231	0.491384	1.10347
2020-08-10	B	3.17151	0.548155	1.1822
2020-08-11	B	3.05177	0.520583	1.1341
2020-08-12	B	2.94914	0.508699	1.10933
2020-08-13	B	2.52783	0.423916	0.970667
2020-08-14	B	2.50005	0.428143	0.966333
2020-08-15	B	2.1429	0.356786	0.845542
2020-08-16	B	2.50344	0.424896	0.939183
2020-08-17	B	2.47913	0.417865	0.921451
2020-08-18	B	3.12497	0.550674	1.1226
2020-08-19	B	2.67855	0.458895	0.982277
2020-08-20	B	2.96256	0.521078	1.07616
2020-08-21	B	2.53934	0.434232	0.941638
2020-08-22	B	2.17657	0.36186	0.823933
2020-08-23	B	1.86563	0.30155	0.720941
2020-08-24	B	1.59912	0.251292	0.630824
2020-08-25	B	1.704	0.28429	0.668971
2020-08-26	B	1.46057	0.236908	0.585349
2020-08-27	B	1.91859	0.324997	0.711514
2020-08-28	B	1.6445	0.27083	0.622575
2020-08-29	B	1.40957	0.225692	0.544753
2020-08-30	B	1.54154	0.251863	0.576325
2020-08-31	B	1.32132	0.209886	0.504285
2020-09-01	B	1.79923	0.313572	0.657915
2020-09-02	B	1.87553	0.325097	0.675344
2020-09-03	B	1.94093	0.345794	0.707926
2020-09-04	B	1.66366	0.288162	0.619435
2020-09-05	B	1.42599	0.240135	0.542006
2020-09-06	B	1.55561	0.274992	0.591255
2020-09-07	B	2.00005	0.356734	0.716681
2020-09-08	B	2.04766	0.372158	0.744096
2020-09-09	B	2.08847	0.373918	0.750751
2020-09-10	B	1.79012	0.311598	0.656907
2020-09-11	B	1.53439	0.259665	0.574793
2020-09-12	B	1.64852	0.280174	0.602609
2020-09-13	B	1.74635	0.297265	0.62695
2020-09-14	B	1.49687	0.24772	0.548581
2020-09-15	B	1.28303	0.206434	0.480008
2020-09-16	B	1.09974	0.172028	0.420007
2020-09-17	B	0.942634	0.143357	0.367506
2020-09-18	B	0.807972	0.119464	0.321568
2020-09-19	B	0.692548	0.0995533	0.281372
2020-09-20	B	0.92695	0.146749	0.345869
2020-09-21	B	0.794529	0.12229	0.302635
2020-09-22	B	1.3477	0.240576	0.481474
2020-09-23	B	1.82183	0.339147	0.637956
2020-09-24	B	1.56157	0.282622	0.558211
2020-09-25	B	1.33849	0.235519	0.488435
2020-09-26	B	1.14728	0.196265	0.427381
2020-09-27	B	0.98338	0.163555	0.373958
2020-09-28	B	0.842897	0.136295	0.327213
2020-09-29	B	0.722483	0.11358	0.286312
2020-09-30	B	0.619272	0.0946496	0.250523
2020-02-18	C	0	0	0
2020-02-19	C	0	0	0
2020-02-20	C	0	0	0
2020-02-21	C	0	0	0
2020-02-22	C	0	0	0
2020-02-23	C	0	0	0
2020-02-24	C	0	0	0
2020-02-25	C	0	0	0
2020-02-26	C	0.333333	0.07488	0.117
2020-02-27	C	0.619048	0.13728	0.219375
2020-02-28	C	1.19728	0.241973	0.391286
2020-02-29	C	2.35957	0.478978	0.775709
2020-03-01	C	3.02249	0.601602	0.995079
2020-03-02	C	3.92404	0.767575	1.28669
2020-03-03	C	5.36346	0.958579	1.62419
2020-03-04	C	6.26392	1.13994	1.95417
2020-03-05	C	7.03574	1.26888	2.20823
2020-03-06	C	8.6973	1.57879	2.74687
2020-03-07	C	11.4548	2.09219	3.61684
2020-03-08	C	13.4851	2.31757	4.06174
2020-03-09	C	15.892	2.73003	4.80202
2020-03-10	C	18.955	3.32889	5.84843
2020-03-11	C	22.9138	4.11637	7.21471
2020-03-12	C	26.9738	4.91127	8.62687
2020-03-13	C	28.1204	5.00792	8.97852
2020-03-14	C	31.1032	5.55716	10.0185
2020-03-15	C	35.9932	6.47246	11.6436
2020-03-16	C	40.1846	7.14092	12.9181
2020-03-17	C	45.7773	8.13338	14.7137
2020-03-18	C	53.2377	9.34315	16.8828
2020-03-19	C	63.299	10.9254	19.6778
2020-03-20	C	78.2563	13.564	24.1861
2020-03-21	C	88.7435	15.4023	27.5675
2020-03-22	C	93.7325	16.0301	29.1135
2020-03-23	C	102.342	17.5961	32.0957
2020-03-24	C	119.722	20.615	37.3831
2020-03-25	C	139.619	24.143	43.5912
2020-03-26	C	153.007	26.4008	47.9573
2020-03-27	C	180.148	31.3579	56.5833
2020-03-28	C	191.08	33.1703	60.5084
2020-03-29	C	214.449	37.4373	68.2502
2020-03-30	C	241.147	42.1191	76.7836
2020-03-31	C	267.031	46.4894	84.9826
2020-04-01	C	299.217	52.1474	95.3071
2020-04-02	C	338.138	59.1061	107.847
2020-04-03	C	376.833	66.1419	120.752
2020-04-04	C	415.333	72.801	133.287
2020-04-05	C	460.666	80.9933	148.385
2020-04-06	C	515.857	90.4909	165.769
2020-04-07	C	582.83	102.405	187.228
2020-04-08	C	648.902	113.778	208.263
2020-04-09	C	706.868	123.358	226.829
2020-04-10	C	791.554	138.003	253.483
2020-04-11	C	842.141	146.341	270.764
2020-04-12	C	914.169	158.797	294.491
2020-04-13	C	981.906	170.359	317.098
2020-04-14	C	1072.3	185.976	346.227
2020-04-15	C	1167.45	202.637	377.412
2020-04-16	C	1237.67	213.956	400.692
2020-04-17	C	1310.86	226.622	426.113
2020-04-18	C	1380.93	237.701	449.177
2020-04-19	C	1445.32	247.829	470.757
2020-04-20	C	1509.84	258.444	493.036
2020-04-21	C	1575.15	269.417	515.855
2020-04-22	C	1647.46	280.932	539.526
2020-04-23	C	1703.78	290.04	559.476
2020-04-24	C	1780.05	302.591	584.684
2020-04-25	C	1820.09	309.057	600.501
2020-04-26	C	1856.74	314.825	614.935
2020-04-27	C	1893.16	320.145	628.366
2020-04-28	C	1918.71	324.379	639.806
2020-04-29	C	1928.61	324.806	644.972
2020-04-30	C	1906.09	319.765	641.059
2020-05-01	C	1897.13	317.073	639.993
2020-05-02	C	1882.78	313.097	636.351
2020-05-03	C	1858.81	308.332	630.899
2020-05-04	C	1820.26	301.175	621.149
2020-05-05	C	1787.89	295.788	613.519
2020-05-06	C	1737.15	286.468	599.294
2020-05-07	C	1667.32	273.459	578.657
2020-05-08	C	1600.79	260.641	557.51
2020-05-09	C	1535.44	249.142	537.729
2020-05-10	C	1460.76	235.753	514.474
2020-05-11	C	1401.41	225.16	495.006
2020-05-12	C	1340.55	214.598	475.263
2020-05-13	C	1272.37	202.816	453.33
2020-05-14	C	1214.6	192.664	433.619
2020-05-15	C	1147.42	181.326	411.873
2020-05-16	C	1079.84	169.911	389.773
2020-05-17	C	1007.91	157.802	366.38
2020-05-18	C	937.256	145.688	342.747
2020-05-19	C	874.362	135.381	321.74
2020-05-20	C	808.12	124.474	299.735
2020-05-21	C	746.674	114.272	278.744
2020-05-22	C	688.34	104.687	258.682
2020-05-23	C	630.005	94.9379	238.376
2020-05-24	C	586.671	88.0728	222.575
2020-05-25	C	540.861	80.9346	206.536
2020-05-26	C	499.595	74.487	191.721
2020-05-27	C	458.558	67.8438	176.774
2020-05-28	C	419.716	61.8419	162.967
2020-05-29	C	380.757	55.6783	149.07
2020-05-30	C	345.363	49.9762	136.026
2020-05-31	C	316.692	45.8456	125.584
2020-06-01	C	289.784	41.8905	115.645
2020-06-02	C	263.386	37.8484	105.782
2020-06-03	C	239.759	34.3858	97.0055
2020-06-04	C	217.841	31.0427	88.6109
2020-06-05	C	199.721	28.523	81.6815
2020-06-06	C	185.856	26.6229	75.9303
2020-06-07	C	168.972	24.1354	69.4854
2020-06-08	C	152.167	21.433	62.8624
2020-06-09	C	138.095	19.4055	57.4182
2020-06-10	C	126.034	17.6938	52.6199
2020-06-11	C	116.696	16.5032	48.7898
2020-06-12	C	108.692	15.3834	45.2391
2020-06-13	C	97.1642	13.6182	40.8322
2020-06-14	C	88.9503	12.4356	37.4268
2020-06-15	C	78.2431	10.7568	33.3638
2020-06-16	C	69.7322	9.50761	30.0427
2020-06-17	C	61.4371	8.24194	26.7857
2020-06-18	C	56.3271	7.60322	24.5858
2020-06-19	C	49.947	6.66604	22.0282
2020-06-20	C	43.8117	5.75749	19.591
2020-06-21	C	39.5529	5.2139	17.7922
2020-06-22	C	34.9025	4.53628	15.8671
2020-06-23	C	31.5831	4.04647	14.2997
2020-06-24	C	27.7379	3.51073	12.7289
2020-06-25	C	24.7753	3.11697	11.4368
2020-06-26	C	21.9026	2.73614	10.2239
2020-06-27	C	19.7737	2.49366	9.27957
2020-06-28	C	19.2822	2.55784	8.86929
2020-06-29	C	16.861	2.19532	7.8603
2020-06-30	C	15.4522	2.02079	7.17676
2020-07-01	C	13.5781	1.75887	6.39666
2020-07-02	C	11.9717	1.52951	5.69674
2020-07-03	C	10.5948	1.33838	5.08432
2020-07-04	C	10.4146	1.37046	4.84744
2020-07-05	C	9.92678	1.3556	4.57518
2020-07-06	C	9.17534	1.26833	4.21995
2020-07-07	C	8.19791	1.12073	3.79212
2020-07-08	C	7.69344	1.07261	3.53477
2020-07-09	C	7.59438	1.0852	3.39192
2020-07-10	C	6.50947	0.904333	2.96793
2020-07-11	C	5.91287	0.817396	2.69661
2020-07-12	C	5.06817	0.681164	2.35953
2020-07-13	C	4.67748	0.567636	2.06459
2020-07-14	C	4.3426	0.47303	1.80652
2020-07-15	C	3.72223	0.394192	1.5807
2020-07-16	C	3.19048	0.328493	1.38311
2020-07-17	C	2.7347	0.273744	1.21022
2020-07-18	C	2.67736	0.303	1.17595
2020-07-19	C	2.29488	0.2525	1.02895
2020-07-20	C	1.96704	0.210417	0.900334
2020-07-21	C	1.68604	0.175347	0.787792
2020-07-22	C	2.11184	0.284789	0.905985
2020-07-23	C	2.47681	0.37599	1.0094
2020-07-24	C	2.45631	0.377112	0.982893
2020-07-25	C	2.43874	0.378046	0.959698
2020-07-26	C	2.09035	0.315039	0.839736
2020-07-27	C	2.12507	0.32632	0.834437
2020-07-28	C	2.15482	0.33572	0.829799
2020-07-29	C	2.847	0.493315	1.05974
2020-07-30	C	2.77362	0.474883	1.02694
2020-07-31	C	2.71072	0.470616	1.01558
2020-08-01	C	2.32348	0.39218	0.888628
2020-08-02	C	2.32488	0.390602	0.877215
2020-08-03	C	1.99275	0.325502	0.767563
2020-08-04	C	2.37474	0.421011	0.905618
2020-08-05	C	2.03549	0.350843	0.792415
2020-08-06	C	1.74471	0.292369	0.693363
2020-08-07	C	1.49546	0.243641	0.606693
2020-08-08	C	1.28183	0.203034	0.530856
2020-08-09	C	1.43204	0.232982	0.564166
2020-08-10	C	1.22746	0.194151	0.493645
2020-08-11	C	1.05211	0.161793	0.43194
2020-08-12	C	1.23514	0.209707	0.494947
2020-08-13	C	1.39203	0.238544	0.532747
2020-08-14	C	1.19317	0.198786	0.466153
2020-08-15	C	1.68938	0.293228	0.607216
2020-08-16	C	2.44805	0.446811	0.84765
2020-08-17	C	2.09833	0.372343	0.741694
2020-08-18	C	2.46523	0.385166	0.765982
2020-08-19	C	2.11306	0.320971	0.670234
2020-08-20	C	2.14453	0.331264	0.686123
2020-08-21	C	2.83817	0.478507	0.916692
2020-08-22	C	2.43272	0.398756	0.802105
2020-08-23	C	2.41852	0.396083	0.801509
2020-08-24	C	2.07302	0.330069	0.70132
2020-08-25	C	2.44354	0.402631	0.812988
2020-08-26	C	2.4278	0.399313	0.811033
2020-08-27	C	2.08097	0.332761	0.709654
2020-08-28	C	2.11702	0.341088	0.720614
2020-08-29	C	2.48126	0.411813	0.82987
2020-08-30	C	2.12679	0.343177	0.726136
2020-08-31	C	1.82296	0.285981	0.635369
2020-09-01	C	2.22921	0.365892	0.755283
2020-09-02	C	2.57742	0.443576	0.877539
2020-09-03	C	2.87588	0.49722	0.96718
2020-09-04	C	2.46504	0.41435	0.846282
2020-09-05	C	2.44623	0.345292	0.740497
2020-09-06	C	2.09677	0.287743	0.647935
2020-09-07	C	2.13056	0.303572	0.666608
2020-09-08	C	1.82619	0.252976	0.583282
2020-09-09	C	1.56531	0.210814	0.510372
2020-09-10	C	1.34169	0.175678	0.446575
2020-09-11	C	1.15002	0.146398	0.390753
2020-09-12	C	0.985732	0.121999	0.341909
2020-09-13	C	1.51158	0.251425	0.53317
2020-09-14	C	1.29564	0.209521	0.466524
2020-09-15	C	1.77721	0.238387	0.507874
2020-09-16	C	1.52332	0.198656	0.444389
2020-09-17	C	1.30571	0.165546	0.388841
2020-09-18	C	1.45251	0.212835	0.457236
2020-09-19	C	1.91167	0.316029	0.616748
2020-09-20	C	1.63858	0.263358	0.539654
2020-09-21	C	1.40449	0.219465	0.472197
2020-09-22	C	1.20385	0.182887	0.413173
2020-09-23	C	1.69854	0.291073	0.578193
2020-09-24	C	1.45589	0.24256	0.505919
2020-09-25	C	1.91457	0.329706	0.64201
2020-09-26	C	1.97439	0.338542	0.661426
2020-09-27	C	2.359	0.409691	0.778081
2020-09-28	C	2.35533	0.416289	0.79782
2020-09-29	C	2.35219	0.410694	0.797759
2020-09-30	C	2.01616	0.342245	0.69804
2020-02-18	D	0	0	0
2020-02-19	D	0.666667	0.138667	0.216667
2020-02-20	D	1.2381	0.254222	0.40625
2020-02-21	D	2.39456	0.489185	0.788802
2020-02-22	D	4.38581	0.790374	1.2882
2020-02-23	D	5.75927	1.05246	1.74251
2020-02-24	D	6.26985	1.15438	1.95803
2020-02-25	D	10.0408	1.87719	3.14328
2020-02-26	D	10.6064	1.89435	3.26603
2020-02-27	D	13.0912	2.30246	3.98878
2020-02-28	D	18.8877	3.35531	5.73485
2020-02-29	D	24.1895	4.34916	7.44466
2020-03-01	D	29.4005	5.21064	8.99274
2020-03-02	D	35.8671	6.33346	10.98
2020-03-03	D	40.0766	7.0334	12.3505
2020-03-04	D	46.3513	8.07429	14.2647
2020-03-05	D	54.7297	9.56847	16.9189
2020-03-06	D	72.2445	12.9019	22.5044
2020-03-07	D	87.5905	15.6022	27.2703
2020-03-08	D	98.7443	17.5806	31.0159
2020-03-09	D	109.638	19.3846	34.5359
2020-03-10	D	132.975	23.5614	41.7932
2020-03-11	D	153.646	27.2001	48.3904
2020-03-12	D	167.696	29.5003	53.019
2020-03-13	D	197.406	34.7783	62.3209
2020-03-14	D	226.205	39.7425	71.3441
2020-03-15	D	251.89	43.9736	79.3868
2020-03-16	D	291.239	50.478	91.0781
2020-03-17	D	342.967	60.0612	107.812
2020-03-18	D	394.972	69.2397	124.318
2020-03-19	D	440.214	77.285	139.38
2020-03-20	D	498.326	87.2398	157.638
2020-03-21	D	558.803	97.3659	176.474
2020-03-22	D	640.641	111.326	201.583
2020-03-23	D	719.788	124.271	225.603
2020-03-24	D	819.961	141.804	257.16
2020-03-25	D	932.49	161.802	293.191
2020-03-26	D	1060.61	184.661	334.395
2020-03-27	D	1194.76	207.97	377.104
2020-03-28	D	1337.08	231.923	421.551
2020-03-29	D	1499.07	260.239	473.499
2020-03-30	D	1692.25	293.773	534.479
2020-03-31	D	1908.17	331.841	603.653
2020-04-01	D	2138.24	370.805	675.495
2020-04-02	D	2385.78	412.938	753.454
2020-04-03	D	2661.62	459.538	839.622
2020-04-04	D	2962.05	511.798	935.996
2020-04-05	D	3318.57	574.136	1049.68
2020-04-06	D	3699.15	639.062	1169.43
2020-04-07	D	4105.37	708.079	1297.51
2020-04-08	D	4550.56	786.576	1442.37
2020-04-09	D	5017.81	865.64	1590.45
2020-04-10	D	5464.98	941.397	1735.44
2020-04-11	D	5983.6	1028.57	1899.88
2020-04-12	D	6480.47	1113.49	2062.93
2020-04-13	D	7016.35	1204.69	2237.55
2020-04-14	D	7589.35	1302.69	2424.7
2020-04-15	D	8139.16	1396.42	2607.3
2020-04-16	D	8706.75	1490	2791.27
2020-04-17	D	9229.6	1575.58	2964.1
2020-04-18	D	9765.08	1666.79	3146.4
2020-04-19	D	10270.4	1750.4	3317.8
2020-04-20	D	10729.5	1826.31	3477.53
2020-04-21	D	11164.1	1895.56	3626.63
2020-04-22	D	11512.5	1950.7	3753.09
2020-04-23	D	11806.2	1995.54	3862.02
2020-04-24	D	12054	2031.95	3955.82
2020-04-25	D	12226.6	2055.68	4027.59
2020-04-26	D	12353.6	2070.86	4083.19
2020-04-27	D	12399.8	2072.31	4114.34
2020-04-28	D	12347.8	2055.63	4113.65
2020-04-29	D	12283.5	2037.18	4105.94
2020-04-30	D	12103	1997.43	4061.09
2020-05-01	D	11857.7	1948.23	3996.76
2020-05-02	D	11567.7	1893.96	3919.71
2020-05-03	D	11182.9	1820.85	3808.73
2020-05-04	D	10847	1759.11	3710.36
2020-05-05	D	10449.4	1688.75	3594.72
2020-05-06	D	10011	1609.35	3461.1
2020-05-07	D	9562.16	1529.35	3322.56
2020-05-08	D	9089.81	1446.57	3176.16
2020-05-09	D	8587.93	1358.29	3017.92
2020-05-10	D	8115.75	1277.25	2867.78
2020-05-11	D	7642.69	1196.51	2715.76
2020-05-12	D	7184.21	1119.28	2567.21
2020-05-13	D	6725.89	1041.96	2416.98
2020-05-14	D	6282.72	967.774	2270.28
2020-05-15	D	5845.19	894.731	2124.39
2020-05-16	D	5411.49	822.536	1979.04
2020-05-17	D	4995.76	754.702	1839.87
2020-05-18	D	4624.08	695.396	1713.76
2020-05-19	D	4256.16	636.175	1588.1
2020-05-20	D	3919.14	582.079	1470.73
2020-05-21	D	3600.26	531.63	1359.65
2020-05-22	D	3299.27	484.634	1254.71
2020-05-23	D	3015.28	439.768	1153.97
2020-05-24	D	2752.86	399.165	1060.81
2020-05-25	D	2503.59	360.551	971.82
2020-05-26	D	2293.94	329.23	895.297
2020-05-27	D	2093.9	299.099	822.042
2020-05-28	D	1921.1	273.655	757.42
2020-05-29	D	1745.66	247.212	692.69
2020-05-30	D	1590.61	224.278	634.648
2020-05-31	D	1444.05	202.573	579.809
2020-06-01	D	1309.09	182.838	529.251
2020-06-02	D	1190.74	165.619	483.803
2020-06-03	D	1081.64	150.002	442.057
2020-06-04	D	982.785	135.993	403.973
2020-06-05	D	886.72	121.575	366.363
2020-06-06	D	802.713	109.574	333.477
2020-06-07	D	727.706	98.9331	303.7
2020-06-08	D	654.415	88.4485	275.119
2020-06-09	D	589.927	79.2981	249.466
2020-06-10	D	534.318	71.6811	227.031
2020-06-11	D	484.987	64.9731	206.838
2020-06-12	D	439.37	58.5927	187.934
2020-06-13	D	396.603	52.757	170.583
2020-06-14	D	357.279	47.2312	154.364
2020-06-15	D	321.239	42.2769	139.627
2020-06-16	D	292.014	38.4783	127.248
2020-06-17	D	262.964	34.5252	115.186
2020-06-18	D	238.731	31.3696	104.848
2020-06-19	D	215.294	28.2186	94.9877
2020-06-20	D	191.537	24.8883	85.2593
2020-06-21	D	172.508	22.4125	77.2149
2020-06-22	D	155.198	20.0388	69.6907
2020-06-23	D	140.36	18.1051	63.1763
2020-06-24	D	129.975	16.9624	58.2086
2020-06-25	D	117.741	15.3167	52.7786
2020-06-26	D	105.92	13.7762	47.7629
2020-06-27	D	95.789	12.4703	43.3395
2020-06-28	D	86.1048	11.1906	39.1701
2020-06-29	D	77.8041	10.0826	35.4568
2020-06-30	D	70.0226	9.00955	31.9737
2020-07-01	D	62.686	8.04043	28.809
2020-07-02	D	57.0642	7.33823	26.2046
2020-07-03	D	52.2455	6.77524	23.9603
2020-07-04	D	47.4486	6.15633	21.7626
2020-07-05	D	43.0035	5.59897	19.7746
2020-07-06	D	39.8602	5.26208	18.2345
2020-07-07	D	34.8325	4.44885	16.0548
2020-07-08	D	33.5231	4.44231	15.1963
2020-07-09	D	30.7341	4.09573	13.9121
2020-07-10	D	28.3435	3.81802	12.8057
2020-07-11	D	25.9611	3.51171	11.7207
2020-07-12	D	23.919	3.25645	10.7713
2020-07-13	D	23.8354	3.33216	10.3912
2020-07-14	D	21.097	2.91547	9.30897
2020-07-15	D	20.4165	2.89825	8.87769
2020-07-16	D	18.8332	2.67036	8.16664
2020-07-17	D	19.476	2.83266	8.09481
2020-07-18	D	19.3604	2.80706	7.78063
2020-07-19	D	18.5947	2.65815	7.30638
2020-07-20	D	18.2716	2.68381	7.12541
2020-07-21	D	18.6614	2.82168	7.14907
2020-07-22	D	16.9955	2.54276	6.55444
2020-07-23	D	16.9009	2.62094	6.51946
2020-07-24	D	15.8198	2.43927	6.1032
2020-07-25	D	15.5598	2.42654	5.95563
2020-07-26	D	15.6703	2.49081	5.94351
2020-07-27	D	14.7651	2.34191	5.61658
2020-07-28	D	14.6558	2.34541	5.52984
2020-07-29	D	14.5621	2.29563	5.37161
2020-07-30	D	13.4818	2.10439	4.99916
2020-07-31	D	13.5558	2.08368	4.88994
2020-08-01	D	13.6193	2.14131	4.91136
2020-08-02	D	13.3403	2.12554	4.83044
2020-08-03	D	13.4346	2.19838	4.89396
2020-08-04	D	12.8487	2.08713	4.68089
2020-08-05	D	12.6798	2.08039	4.62877
2020-08-06	D	12.2018	1.98881	4.44885
2020-08-07	D	11.792	1.91249	4.29141
2020-08-08	D	11.1074	1.7851	4.05398
2020-08-09	D	10.5206	1.71222	3.89823
2020-08-10	D	9.35103	1.49064	3.51062
2020-08-11	D	9.3485	1.50844	3.48779
2020-08-12	D	11.6797	2.00306	4.21748
2020-08-13	D	12.0111	2.06303	4.30563
2020-08-14	D	11.9619	2.04922	4.2831
2020-08-15	D	10.9197	1.84635	3.96438
2020-08-16	D	11.0264	1.86865	3.98449
2020-08-17	D	11.1179	1.88723	4.0021
2020-08-18	D	10.5296	1.76406	3.80084
2020-08-19	D	10.0254	1.66141	3.62473
2020-08-20	D	10.2599	1.72563	3.70464
2020-08-21	D	10.4608	1.75695	3.73989
2020-08-22	D	9.6331	1.52792	3.37207
2020-08-23	D	9.25695	1.47572	3.2669
2020-08-24	D	8.60119	1.35734	3.05787
2020-08-25	D	9.37245	1.52493	3.29097
2020-08-26	D	10.7002	1.79216	3.69427
2020-08-27	D	12.8383	2.15352	4.26381
2020-08-28	D	12.0042	1.99705	4.04717
2020-08-29	D	10.2893	1.66421	3.54127
2020-08-30	D	9.48609	1.5366	3.33261
2020-08-31	D	10.1309	1.6965	3.56604
2020-09-01	D	10.6837	1.73268	3.61861
2020-09-02	D	10.1574	1.57148	3.36562
2020-09-03	D	10.0397	1.5758	3.36092
2020-09-04	D	11.2721	1.85674	3.79014
2020-09-05	D	11.3285	1.87731	3.83204
2020-09-06	D	11.0435	1.81958	3.75171
2020-09-07	D	10.7992	1.80474	3.73341
2020-09-08	D	10.2564	1.7175	3.6004
2020-09-09	D	11.1246	1.84725	3.80035
2020-09-10	D	12.202	2.04967	4.12264
2020-09-11	D	11.7922	1.98539	4.04064
2020-09-12	D	11.1076	1.86804	3.86923
2020-09-13	D	10.5208	1.77024	3.71924
2020-09-14	D	10.0178	1.67766	3.57067
2020-09-15	D	9.25337	1.52562	3.32367
2020-09-16	D	11.2648	1.86762	3.83988
2020-09-17	D	11.3222	1.87528	3.85822
2020-09-18	D	12.7047	2.17009	4.32494
2020-09-19	D	12.8898	2.13843	4.29999
2020-09-20	D	12.3817	1.98448	4.07883
2020-09-21	D	11.6129	1.8451	3.86797
2020-09-22	D	12.6206	2.00627	4.11681
2020-09-23	D	14.151	2.34304	4.65088
2020-09-24	D	13.7961	2.27147	4.56785
2020-09-25	D	13.8252	2.2867	4.6122
2020-09-26	D	13.8502	2.2994	4.65101
2020-09-27	D	12.2049	1.97995	4.1693
2020-09-28	D	13.128	2.17135	4.4628
2020-09-29	D	11.9193	1.95922	4.13895
2020-09-30	D	11.5498	1.89892	4.03758
2020-02-18	E	0	0	0
2020-02-19	E	0	0	0
2020-02-20	E	0	0	0
2020-02-21	E	0	0	0
2020-02-22	E	0	0	0
2020-02-23	E	0.333333	0.0637867	0.0996667
2020-02-24	E	0.285714	0.0531556	0.0872083
2020-02-25	E	0.911565	0.17187	0.275641
2020-02-26	E	0.781341	0.143225	0.241186
2020-02-27	E	0.669721	0.119354	0.211037
2020-02-28	E	0.90738	0.163248	0.284324
2020-02-29	E	1.44442	0.274707	0.46545
2020-03-01	E	1.90474	0.356496	0.606603
2020-03-02	E	2.96597	0.56332	0.946777
2020-03-03	E	3.54226	0.671887	1.14476
2020-03-04	E	5.36956	0.953719	1.617
2020-03-05	E	5.60248	0.986126	1.71388
2020-03-06	E	9.46879	1.66209	2.81264
2020-03-07	E	10.1161	1.70401	2.95939
2020-03-08	E	11.3376	1.96358	3.4388
2020-03-09	E	12.718	2.2104	3.90595
2020-03-10	E	16.9011	3.05672	5.31571
2020-03-11	E	18.4867	3.35708	5.91658
2020-03-12	E	21.5124	3.90413	6.90601
2020-03-13	E	22.4392	3.96618	7.15642
2020-03-14	E	26.5669	4.73342	8.49354
2020-03-15	E	29.7716	5.32841	9.59418
2020-03-16	E	36.8519	6.50648	11.6232
2020-03-17	E	41.9207	7.39113	13.247
2020-03-18	E	53.2653	9.51223	16.8301
2020-03-19	E	58.3227	10.4062	18.6004
2020-03-20	E	70.9909	12.8041	22.732
2020-03-21	E	79.516	14.3115	25.5802
2020-03-22	E	89.1565	15.8977	28.588
2020-03-23	E	98.7532	17.4829	31.6315
2020-03-24	E	108.312	19.1035	34.7625
2020-03-25	E	123.172	21.6354	39.3482
2020-03-26	E	135.91	23.7786	43.4127
2020-03-27	E	151.494	26.552	48.5118
2020-03-28	E	168.185	29.4205	53.8445
2020-03-29	E	193.492	33.8466	61.6912
2020-03-30	E	214.517	37.4573	68.4358
2020-03-31	E	238.205	41.2484	75.5594
2020-04-01	E	264.843	45.7637	83.9114
2020-04-02	E	304.341	53.007	96.6578
2020-04-03	E	343.531	59.8862	109.128
2020-04-04	E	393.455	68.8637	125.11
2020-04-05	E	431.58	75.1302	137.196
2020-04-06	E	476.259	82.7679	151.545
2020-04-07	E	525.889	91.7423	168.179
2020-04-08	E	589.762	102.627	188.054
2020-04-09	E	645.844	111.783	205.58
2020-04-10	E	706.914	122.392	225.569
2020-04-11	E	753.259	130.32	241.633
2020-04-12	E	816.651	141.514	262.857
2020-04-13	E	879.32	152.656	284.262
2020-04-14	E	953.703	165.452	308.477
2020-04-15	E	1029.79	178.456	333.323
2020-04-16	E	1104.35	191.179	358.01
2020-04-17	E	1168.92	202.247	380.338
2020-04-18	E	1248.59	215.769	406.593
2020-04-19	E	1329.56	229.519	433.444
2020-04-20	E	1410.62	243.058	460.188
2020-04-21	E	1492.44	257.233	488.109
2020-04-22	E	1551.23	266.796	509.026
2020-04-23	E	1610.63	276.413	529.902
2020-04-24	E	1673.2	286.915	552.056
2020-04-25	E	1719.51	293.691	568.355
2020-04-26	E	1756.86	299.602	583.028
2020-04-27	E	1789.22	304.4	595.668
2020-04-28	E	1814.95	307.733	605.688
2020-04-29	E	1827.67	308.403	611.162
2020-04-30	E	1797.24	301.278	603.948
2020-05-01	E	1797.16	300.716	606.034
2020-05-02	E	1796.42	300.434	608.15
2020-05-03	E	1770.12	294.868	601.673
2020-05-04	E	1738.25	288.33	593.037
2020-05-05	E	1693.26	279.637	580.41
2020-05-06	E	1640.03	269.65	565.076
2020-05-07	E	1592.08	261.261	551.555
2020-05-08	E	1544.64	252.409	536.816
2020-05-09	E	1483.97	241.244	518.001
2020-05-10	E	1424.64	230.318	499.002
2020-05-11	E	1356.79	218.572	478.253
2020-05-12	E	1288.3	206.762	456.938
2020-05-13	E	1222.92	195.112	435.462
2020-05-14	E	1157.88	184.062	414.574
2020-05-15	E	1091.81	172.895	393.237
2020-05-16	E	1040.5	164.533	376.041
2020-05-17	E	974.857	153.493	354.633
2020-05-18	E	907.592	142.124	332.512
2020-05-19	E	853.936	133.332	314.222
2020-05-20	E	799.945	124.436	295.766
2020-05-21	E	749.001	116.069	278.126
2020-05-22	E	695.001	106.996	259.411
2020-05-23	E	648.715	99.6135	243.313
2020-05-24	E	605.708	92.8926	228.338
2020-05-25	E	562.178	86.03	213.264
2020-05-26	E	519.534	79.0493	198.102
2020-05-27	E	477.648	72.1144	183.09
2020-05-28	E	437.412	65.4313	168.541
2020-05-29	E	401.925	59.7787	155.681
2020-05-30	E	366.174	54.0671	142.863
2020-05-31	E	334.53	49.1577	131.415
2020-06-01	E	306.74	44.9695	121.245
2020-06-02	E	280.253	41.0244	111.636
2020-06-03	E	257.884	37.5733	102.973
2020-06-04	E	237.71	34.5475	95.158
2020-06-05	E	216.085	31.1525	86.9552
2020-06-06	E	198.549	28.6783	80.3325
2020-06-07	E	182.518	26.414	74.2213
2020-06-08	E	166.111	23.9502	67.9726
2020-06-09	E	151.714	21.8222	62.388
2020-06-10	E	137.04	19.6134	56.8212
2020-06-11	E	121.797	17.1432	50.9665
2020-06-12	E	110.73	15.5229	46.5284
2020-06-13	E	99.5784	13.8094	42.0773
2020-06-14	E	89.6863	12.3814	38.1827
2020-06-15	E	78.8739	10.7117	34.0252
2020-06-16	E	72.9396	10.0024	31.4534
2020-06-17	E	65.1863	8.87893	28.371
2020-06-18	E	57.874	7.79293	25.44
2020-06-19	E	53.9396	7.3788	23.6423
2020-06-20	E	47.5673	6.43743	21.1377
2020-06-21	E	42.772	5.75834	19.1108
2020-06-22	E	38.6617	5.18133	17.32
2020-06-23	E	34.8053	4.64781	15.6706
2020-06-24	E	31.4997	4.2032	14.2275
2020-06-25	E	29.3331	3.98245	13.1987
2020-06-26	E	26.476	3.58495	11.9649
2020-06-27	E	23.3604	3.11503	10.6686
2020-06-28	E	21.3565	2.85101	9.73369
2020-06-29	E	19.9723	2.70587	9.03264
2020-06-30	E	18.4524	2.51003	8.30223
2020-07-01	E	16.1497	2.15548	7.36412
2020-07-02	E	14.8426	1.99869	6.75993
2020-07-03	E	13.7222	1.85693	6.21394
2020-07-04	E	13.4286	1.91075	6.00487
2020-07-05	E	12.5102	1.79475	5.57059
2020-07-06	E	11.3897	1.63429	5.09093
2020-07-07	E	10.4293	1.48948	4.6539
2020-07-08	E	8.93937	1.24123	4.07216
2020-07-09	E	8.32898	1.17303	3.77981
2020-07-10	E	7.80579	1.11619	3.524
2020-07-11	E	7.02401	0.993944	3.18316
2020-07-12	E	6.68725	0.978047	3.01927
2020-07-13	E	6.3986	0.942613	2.8412
2020-07-14	E	6.15118	0.913084	2.68538
2020-07-15	E	5.27244	0.760904	2.34971
2020-07-16	E	4.85257	0.697873	2.15566
2020-07-17	E	5.15935	0.784015	2.20254
2020-07-18	E	4.4223	0.653346	1.92722
2020-07-19	E	4.12387	0.619335	1.80332
2020-07-20	E	4.53475	0.740752	1.9289
2020-07-21	E	3.88693	0.617293	1.68779
2020-07-22	E	3.66499	0.578199	1.57648
2020-07-23	E	3.14142	0.481832	1.37942
2020-07-24	E	4.02597	0.667766	1.62299
2020-07-25	E	3.45083	0.556471	1.42012
2020-07-26	E	3.62452	0.602392	1.45927
2020-07-27	E	3.10673	0.501993	1.27686
2020-07-28	E	2.99624	0.493208	1.23425
2020-07-29	E	3.23488	0.560766	1.31397
2020-07-30	E	3.10608	0.542185	1.26672
2020-07-31	E	2.66236	0.451821	1.10838
2020-08-01	E	2.28202	0.376517	0.969836
2020-08-02	E	2.62268	0.452431	1.06527
2020-08-03	E	2.24801	0.377026	0.932114
2020-08-04	E	2.2602	0.377975	0.915266
2020-08-05	E	1.93732	0.314979	0.800858
2020-08-06	E	1.99389	0.337362	0.817751
2020-08-07	E	1.70905	0.281135	0.715532
2020-08-08	E	1.4649	0.234279	0.62609
2020-08-09	E	1.25563	0.195233	0.547829
2020-08-10	E	1.07625	0.162694	0.47935
2020-08-11	E	1.25583	0.199365	0.519098
2020-08-12	E	1.40977	0.241018	0.571212
2020-08-13	E	1.5417	0.275728	0.61681
2020-08-14	E	1.32146	0.229774	0.539709
2020-08-15	E	1.46601	0.266358	0.589245
2020-08-16	E	2.58991	0.510391	0.966256
2020-08-17	E	2.88659	0.552899	1.04481
2020-08-18	E	2.80755	0.524535	1.01387
2020-08-19	E	2.7398	0.500898	0.986802
2020-08-20	E	2.3484	0.417415	0.863452
2020-08-21	E	2.34625	0.411634	0.855189
2020-08-22	E	2.01107	0.343028	0.74829
2020-08-23	E	1.72378	0.285857	0.654754
2020-08-24	E	1.47752	0.238214	0.57291
2020-08-25	E	1.59978	0.273391	0.618296
2020-08-26	E	2.0379	0.366492	0.757674
2020-08-27	E	2.08011	0.369197	0.762633
2020-08-28	E	1.78295	0.307664	0.667304
2020-08-29	E	1.86157	0.320173	0.683556
2020-08-30	E	1.92896	0.330596	0.697776
2020-08-31	E	1.6534	0.275497	0.610554
2020-09-01	E	1.4172	0.229581	0.534235
2020-09-02	E	1.21474	0.191317	0.467456
2020-09-03	E	2.04121	0.361885	0.725359
2020-09-04	E	1.74961	0.301571	0.634689
2020-09-05	E	1.833	0.315096	0.655019
2020-09-06	E	1.57114	0.26258	0.573142
2020-09-07	E	2.01336	0.368577	0.735499
2020-09-08	E	1.72574	0.307147	0.643562
2020-09-09	E	1.4792	0.255956	0.563117
2020-09-10	E	1.60122	0.288177	0.609727
2020-09-11	E	2.03915	0.378815	0.750179
2020-09-12	E	1.74784	0.315679	0.656407
2020-09-13	E	1.49815	0.263066	0.574356
2020-09-14	E	1.61746	0.283008	0.602228
2020-09-15	E	1.38639	0.23584	0.526949
2020-09-16	E	1.18834	0.196533	0.461081
2020-09-17	E	1.35191	0.238658	0.520446
2020-09-18	E	1.15878	0.198881	0.45539
2020-09-19	E	0.993239	0.165735	0.398466
2020-09-20	E	0.851348	0.138112	0.348658
2020-09-21	E	1.06306	0.17888	0.404742
2020-09-22	E	2.24453	0.448587	0.822149
2020-09-23	E	2.25722	0.43761	0.819049
2020-09-24	E	1.93476	0.364675	0.716668
2020-09-25	E	1.9917	0.367683	0.726752
2020-09-26	E	1.70717	0.306403	0.635908
2020-09-27	E	1.46329	0.255336	0.55642
2020-09-28	E	1.25425	0.21278	0.486867
2020-09-29	E	1.4084	0.241103	0.525675
2020-09-30	E	1.54054	0.275799	0.576966
2020-02-18	F	0	0	0
2020-02-19	F	0	0	0
2020-02-20	F	0	0	0
2020-02-21	F	0.333333	0.07488	0.117
2020-02-22	F	0.619048	0.13728	0.219375
2020-02-23	F	0.863946	0.178187	0.29162
2020-02-24	F	1.07386	0.223369	0.372167
2020-02-25	F	1.58712	0.324807	0.542313
2020-02-26	F	1.36039	0.270673	0.474524
2020-02-27	F	1.83271	0.375321	0.649208
2020-02-28	F	2.5709	0.515221	0.884391
2020-02-29	F	2.53696	0.493137	0.873509
2020-03-01	F	3.8412	0.613401	1.08065
2020-03-02	F	5.62579	0.979861	1.67791
2020-03-03	F	6.15544	1.08279	1.88417
2020-03-04	F	6.94276	1.22126	2.14698
2020-03-05	F	8.6176	1.52801	2.67594
2020-03-06	F	10.3865	1.84742	3.23845
2020-03-07	F	13.2361	2.34933	4.09898
2020-03-08	F	16.0119	2.87298	5.0166
2020-03-09	F	18.0578	3.24556	5.71986
2020-03-10	F	21.4781	3.83338	6.76855
2020-03-11	F	24.0765	4.25944	7.58648
2020-03-12	F	27.3036	4.86964	8.70083
2020-03-13	F	31.4031	5.55841	9.95756
2020-03-14	F	36.2503	6.40971	11.4905
2020-03-15	F	43.0717	7.59892	13.5816
2020-03-16	F	50.9186	8.94214	15.9615
2020-03-17	F	58.3112	10.239	18.3213
2020-03-18	F	67.6477	11.9076	21.3048
2020-03-19	F	73.9837	13.0208	23.4821
2020-03-20	F	85.4146	14.7999	26.7175
2020-03-21	F	96.5459	16.8455	30.4281
2020-03-22	F	110.754	19.5319	35.2089
2020-03-23	F	124.598	21.9286	39.6392
2020-03-24	F	145.465	25.7563	46.3756
2020-03-25	F	161.018	28.5966	51.724
2020-03-26	F	185.015	32.4972	58.8001
2020-03-27	F	207.585	36.6351	66.3785
2020-03-28	F	232.596	40.9376	74.3442
2020-03-29	F	268.035	47.1854	85.4741
2020-03-30	F	303.078	53.063	96.2615
2020-03-31	F	333.447	58.4658	106.489
2020-04-01	F	374.812	65.2894	119.065
2020-04-02	F	424.934	74.3093	135.278
2020-04-03	F	464.563	80.894	148.008
2020-04-04	F	525.53	91.3927	166.978
2020-04-05	F	584.454	102.005	186.488
2020-04-06	F	645.961	112.441	206.047
2020-04-07	F	712.681	124.144	227.858
2020-04-08	F	793.202	138.053	253.438
2020-04-09	F	884.554	153.666	282.104
2020-04-10	F	960.856	166.551	306.992
2020-04-11	F	1040.92	179.774	332.652
2020-04-12	F	1140.89	197.106	364.967
2020-04-13	F	1236.9	213.373	396.094
2020-04-14	F	1345.54	232.332	431.771
2020-04-15	F	1449.98	250.186	466.2
2020-04-16	F	1549.84	267.197	499.657
2020-04-17	F	1670.1	288.398	539.908
2020-04-18	F	1766.18	304.332	572.42
2020-04-19	F	1864.87	320.866	605.955
2020-04-20	F	1976.13	340.033	643.718
2020-04-21	F	2098.82	361.294	685.025
2020-04-22	F	2198.66	377.492	718.793
2020-04-23	F	2307.56	395.749	755.776
2020-04-24	F	2383.58	407.786	783.17
2020-04-25	F	2430.73	414.48	801.927
2020-04-26	F	2477.49	421.431	820.485
2020-04-27	F	2516.89	427.201	836.688
2020-04-28	F	2553.34	431.965	850.796
2020-04-29	F	2572.57	433.62	859.523
2020-04-30	F	2595.4	436.965	870.231
2020-05-01	F	2574.29	431.277	866.358
2020-05-02	F	2541.54	423.689	858.518
2020-05-03	F	2526.13	420.363	856.343
2020-05-04	F	2500.92	415.476	851.133
2020-05-05	F	2440.64	403.913	834.871
2020-05-06	F	2378.65	391.692	816.602
2020-05-07	F	2314.84	379.358	797.259
2020-05-08	F	2243.15	366.349	776.065
2020-05-09	F	2161.37	351.683	751.545
2020-05-10	F	2067.27	334.675	722.611
2020-05-11	F	1984.94	319.894	696.344
2020-05-12	F	1891.71	303.538	667.051
2020-05-13	F	1790.47	285.657	634.777
2020-05-14	F	1687.02	267.883	602.048
2020-05-15	F	1593.02	252.045	571.807
2020-05-16	F	1511.11	238.534	544.856
2020-05-17	F	1423.24	223.702	515.693
2020-05-18	F	1332.92	207.981	484.923
2020-05-19	F	1256.17	195.055	458.272
2020-05-20	F	1161.71	178.676	426.191
2020-05-21	F	1095.42	168.387	403.372
2020-05-22	F	1024.6	157.09	379.149
2020-05-23	F	954.229	145.688	354.848
2020-05-24	F	888.577	135.331	332.25
2020-05-25	F	814.304	123.151	306.929
2020-05-26	F	753.308	113.406	285.407
2020-05-27	F	690.026	103.197	263.312
2020-05-28	F	636.118	94.808	244.165
2020-05-29	F	581.91	86.1979	224.881
2020-05-30	F	531.447	78.1049	206.572
2020-05-31	F	487.526	71.4383	190.674
2020-06-01	F	446.546	65.2533	175.78
2020-06-02	F	409.087	59.428	161.698
2020-06-03	F	374.979	54.3822	149.078
2020-06-04	F	342.078	49.3648	136.765
2020-06-05	F	305.876	43.6528	123.6
2020-06-06	F	278.846	39.5611	113.125
2020-06-07	F	252.344	35.6633	103.196
2020-06-08	F	233.628	33.0751	95.54
2020-06-09	F	209.586	29.4263	86.5095
2020-06-10	F	190.645	26.6629	79.0411
2020-06-11	F	172.41	24.0412	72.008
2020-06-12	F	156.447	21.6317	65.503
2020-06-13	F	141.431	19.4325	59.5121
2020-06-14	F	126.56	17.2477	53.7198
2020-06-15	F	113.813	15.4602	48.7035
2020-06-16	F	102.887	13.9595	44.2969
2020-06-17	F	92.5225	12.4844	40.0901
2020-06-18	F	83.6383	11.2661	36.4265
2020-06-19	F	73.3567	9.71848	32.3889
2020-06-20	F	64.8772	8.48145	28.9383
2020-06-21	F	58.609	7.67524	26.27
2020-06-22	F	52.2363	6.80094	23.6189
2020-06-23	F	47.774	6.26372	21.5982
2020-06-24	F	43.6158	5.75224	19.7304
2020-06-25	F	41.0516	5.52847	18.4125
2020-06-26	F	38.8537	5.3198	17.2246
2020-06-27	F	34.9699	4.77429	15.6045
2020-06-28	F	33.3075	4.64972	14.7026
2020-06-29	F	29.5493	4.08831	13.1984
2020-06-30	F	27.328	3.73695	12.0643
2020-07-01	F	24.7573	3.36927	10.9549
2020-07-02	F	21.2205	2.80773	9.58556
2020-07-03	F	19.189	2.53113	8.68636
2020-07-04	F	17.4477	2.31173	7.9169
2020-07-05	F	15.6219	1.99023	7.02695
2020-07-06	F	15.0569	1.98855	6.66426
2020-07-07	F	14.2392	1.91227	6.22989
2020-07-08	F	13.205	1.80711	5.78482
2020-07-09	F	11.6519	1.5808	5.17872
2020-07-10	F	10.3207	1.38112	4.63105
2020-07-11	F	9.17965	1.21472	4.15183
2020-07-12	F	8.53494	1.13984	3.83218
2020-07-13	F	7.64899	1.01365	3.45283
2020-07-14	F	8.22295	1.16365	3.51956
2020-07-15	F	7.04824	0.969705	3.07961
2020-07-16	F	7.37468	1.01054	3.01099
2020-07-17	F	6.65449	0.905905	2.73429
2020-07-18	F	6.70385	0.957373	2.70883
2020-07-19	F	6.07949	0.861597	2.4699
2020-07-20	F	6.211	0.931546	2.49483
2020-07-21	F	5.99038	0.914955	2.39964
2020-07-22	F	5.46794	0.837342	2.21669
2020-07-23	F	4.68681	0.697785	1.9396
2020-07-24	F	4.35059	0.645273	1.79682
2020-07-25	F	4.39575	0.665302	1.77155
2020-07-26	F	4.76778	0.756871	1.86644
2020-07-27	F	4.42	0.694512	1.7328
2020-07-28	F	5.45524	0.91988	2.0492
2020-07-29	F	4.67592	0.766566	1.79305
2020-07-30	F	4.00793	0.638805	1.56892
2020-07-31	F	4.10204	0.671005	1.58947
2020-08-01	F	3.51603	0.559171	1.39079
2020-08-02	F	3.01374	0.465976	1.21694
2020-08-03	F	2.91655	0.452101	1.16449
2020-08-04	F	2.83323	0.45163	1.13593
2020-08-05	F	2.42848	0.376359	0.993937
2020-08-06	F	2.41489	0.37742	0.969363
2020-08-07	F	2.06991	0.314517	0.848192
2020-08-08	F	1.77421	0.262097	0.742168
2020-08-09	F	2.18742	0.282202	0.749065
2020-08-10	F	2.5416	0.373835	0.872099
2020-08-11	F	2.17851	0.311529	0.763087
2020-08-12	F	1.8673	0.259608	0.667701
2020-08-13	F	2.26722	0.343916	0.783576
2020-08-14	F	2.27666	0.350382	0.785294
2020-08-15	F	2.28477	0.355774	0.786803
2020-08-16	F	2.29171	0.371359	0.805453
2020-08-17	F	2.63099	0.448133	0.921439
2020-08-18	F	2.58847	0.448324	0.923259
2020-08-19	F	3.21869	0.576057	1.12419
2020-08-20	F	3.09221	0.554927	1.10066
2020-08-21	F	2.65047	0.46244	0.963079
2020-08-22	F	2.27183	0.385366	0.842694
2020-08-23	F	2.28061	0.384925	0.837024
2020-08-24	F	2.28814	0.395651	0.849396
2020-08-25	F	2.29459	0.393495	0.842887
2020-08-26	F	1.9668	0.327912	0.737526
2020-08-27	F	2.35249	0.411927	0.862002
2020-08-28	F	2.34976	0.40706	0.853919
2020-08-29	F	2.68074	0.466789	0.946511
2020-08-30	F	2.96444	0.516564	1.02753
2020-08-31	F	2.87428	0.494257	0.998756
2020-09-01	F	2.46367	0.41188	0.873911
2020-09-02	F	2.11172	0.343234	0.764672
2020-09-03	F	2.14338	0.349815	0.768755
2020-09-04	F	2.83717	0.493964	0.988991
2020-09-05	F	2.43186	0.411636	0.865367
2020-09-06	F	3.08446	0.534391	1.0562
2020-09-07	F	2.97715	0.520206	1.04117
2020-09-08	F	2.88518	0.497291	1.01069
2020-09-09	F	3.13968	0.553076	1.10102
2020-09-10	F	2.69115	0.460897	0.963395
2020-09-11	F	2.64004	0.447868	0.942638
2020-09-12	F	2.59622	0.43701	0.924475
2020-09-13	F	2.55867	0.427962	0.908582
2020-09-14	F	2.19314	0.356635	0.795009
2020-09-15	F	2.21317	0.360982	0.7953
2020-09-16	F	1.897	0.300818	0.695887
2020-09-17	F	2.29266	0.389348	0.825566
2020-09-18	F	2.29847	0.399336	0.839371
2020-09-19	F	2.97012	0.546328	1.06812
2020-09-20	F	2.54582	0.455273	0.934602
2020-09-21	F	2.8488	0.506967	1.01711
2020-09-22	F	2.77516	0.486259	0.989638
2020-09-23	F	2.71204	0.480096	0.982934
2020-09-24	F	2.65796	0.46387	0.959738
2020-09-25	F	3.27825	0.577918	1.13877
2020-09-26	F	3.14326	0.556478	1.11342
2020-09-27	F	3.36089	0.591305	1.17358
2020-09-28	F	2.88076	0.492754	1.02688
2020-09-29	F	2.80256	0.474416	0.998189
2020-09-30	F	2.73552	0.459132	0.973081
2020-02-18	G	0	0	0
2020-02-19	G	0	0	0
2020-02-20	G	0	0	0
2020-02-21	G	0	0	0
2020-02-22	G	0.333333	0.07488	0.117
2020-02-23	G	0.285714	0.0624	0.102375
2020-02-24	G	0.244898	0.052	0.0895781
2020-02-25	G	0.543246	0.10712	0.178048
2020-02-26	G	0.798973	0.153053	0.255458
2020-02-27	G	1.68483	0.318904	0.522526
2020-02-28	G	1.77748	0.340634	0.57421
2020-02-29	G	2.85688	0.550101	0.918434
2020-03-01	G	3.44876	0.649778	1.10263
2020-03-02	G	4.28941	0.807722	1.3808
2020-03-03	G	4.34331	0.800675	1.40753
2020-03-04	G	5.05617	0.922376	1.63026
2020-03-05	G	8.00052	1.4287	2.45781
2020-03-06	G	8.19093	1.44573	2.54925
2020-03-07	G	8.68746	1.55699	2.78093
2020-03-08	G	9.77973	1.75509	3.14831
2020-03-09	G	9.04929	1.59015	2.95411
2020-03-10	G	12.4232	2.22923	3.99751
2020-03-11	G	13.3151	2.39017	4.32982
2020-03-12	G	19.7463	3.57816	6.26726
2020-03-13	G	21.5921	3.81102	6.77952
2020-03-14	G	23.5075	4.14375	7.44441
2020-03-15	G	24.4826	4.32672	7.87886
2020-03-16	G	27.6518	4.91462	8.93934
2020-03-17	G	31.7015	5.64026	10.2356
2020-03-18	G	37.5061	6.62768	11.9678
2020-03-19	G	43.4814	7.59752	13.7132
2020-03-20	G	47.9364	8.24764	14.9934
2020-03-21	G	54.4217	9.40786	17.0798
2020-03-22	G	62.3138	10.5245	19.1395
2020-03-23	G	72.4119	12.4118	22.4368
2020-03-24	G	80.734	13.9624	25.2872
2020-03-25	G	92.8672	16.1697	29.2113
2020-03-26	G	106.267	18.5527	33.4942
2020-03-27	G	113.419	19.6095	35.7901
2020-03-28	G	128.883	21.8962	39.996
2020-03-29	G	152.138	26.2535	47.5068
2020-03-30	G	165.737	28.7142	52.2501
2020-03-31	G	178.394	30.8063	56.4655
2020-04-01	G	203.909	35.7336	65.1287
2020-04-02	G	222.113	38.9771	71.3613
2020-04-03	G	246.382	43.3191	79.3758
2020-04-04	G	271.518	47.4977	87.2638
2020-04-05	G	308.73	54.147	99.1145
2020-04-06	G	341.959	60.2593	110.377
2020-04-07	G	371.108	65.4056	120.313
2020-04-08	G	416.092	73.3689	134.749
2020-04-09	G	456.317	80.2102	147.702
2020-04-10	G	493.129	86.6434	160.179
2020-04-11	G	537.015	94.1954	174.52
2020-04-12	G	587.632	103.004	190.999
2020-04-13	G	635.351	111.06	206.535
2020-04-14	G	683.587	119.074	222.162
2020-04-15	G	731.265	127.045	237.856
2020-04-16	G	796.799	138.011	258.343
2020-04-17	G	842.637	145.2	273.222
2020-04-18	G	895.927	154.055	290.719
2020-04-19	G	954.937	163.895	309.871
2020-04-20	G	1003.85	171.462	325.642
2020-04-21	G	1058.78	180.805	344.187
2020-04-22	G	1106.52	189.117	361.236
2020-04-23	G	1166.78	199.678	381.831
2020-04-24	G	1201.43	204.809	394.119
2020-04-25	G	1233.47	209.767	405.937
2020-04-26	G	1283.26	218.316	423.18
2020-04-27	G	1330.93	225.949	439.062
2020-04-28	G	1340.13	226.454	443.81
2020-04-29	G	1357.35	228.859	451.063
2020-04-30	G	1386.78	233.716	461.868
2020-05-01	G	1404.67	235.576	467.904
2020-05-02	G	1413.33	236.865	472.778
2020-05-03	G	1413.76	235.956	473.945
2020-05-04	G	1409.13	234.522	473.908
2020-05-05	G	1403.83	233.441	474.053
2020-05-06	G	1380.61	229.051	468.729
2020-05-07	G	1359.05	225.074	463.573
2020-05-08	G	1329.23	219.386	455.351
2020-05-09	G	1305.34	215.486	449.47
2020-05-10	G	1276.86	210.114	441.009
2020-05-11	G	1236.79	202.945	429.398
2020-05-12	G	1194.1	194.683	415.664
2020-05-13	G	1159.52	188.696	405.05
2020-05-14	G	1127.21	183.219	395.001
2020-05-15	G	1079.18	174.434	379.612
2020-05-16	G	1029.68	165.637	363.841
2020-05-17	G	980.912	157.308	348.482
2020-05-18	G	939.115	150.016	334.493
2020-05-19	G	898.289	143.106	320.952
2020-05-20	G	850.962	135.166	305.693
2020-05-21	G	809.063	128.263	291.895
2020-05-22	G	770.816	121.74	278.618
2020-05-23	G	725.032	113.714	262.953
2020-05-24	G	685.123	107.447	249.904
2020-05-25	G	645.248	100.829	236.307
2020-05-26	G	599.07	93.0458	220.865
2020-05-27	G	556.822	85.9802	206.448
2020-05-28	G	516.943	79.0384	192.186
2020-05-29	G	473.094	71.8307	177.483
2020-05-30	G	444.176	67.4218	167.115
2020-05-31	G	407.389	61.4265	154.416
2020-06-01	G	377.524	56.5468	143.486
2020-06-02	G	349.592	52.1088	133.341
2020-06-03	G	320.65	47.4259	122.927
2020-06-04	G	297.843	43.7176	114.117
2020-06-05	G	275.627	40.2752	105.859
2020-06-06	G	251.585	36.5107	97.2325
2020-06-07	G	228.311	32.8856	88.9221
2020-06-08	G	216.362	31.4509	84.1292
2020-06-09	G	196.786	28.4555	77.1231
2020-06-10	G	184.007	26.6637	72.0933
2020-06-11	G	169.721	24.4773	66.609
2020-06-12	G	155.808	22.3557	61.3422
2020-06-13	G	142.883	20.4186	56.4694
2020-06-14	G	130.471	18.538	51.7898
2020-06-15	G	119.833	17.0347	47.7947
2020-06-16	G	109.38	15.4519	43.7834
2020-06-17	G	98.7545	13.911	39.9268
2020-06-18	G	90.6467	12.6353	36.5653
2020-06-19	G	80.6972	11.1479	32.9609
2020-06-20	G	76.169	10.5573	30.8212
2020-06-21	G	69.6211	9.66026	28.3162
2020-06-22	G	64.0085	8.93491	26.159
2020-06-23	G	58.1978	8.15018	23.9898
2020-06-24	G	53.5505	7.53785	22.1567
2020-06-25	G	48.9004	6.76133	20.1368
2020-06-26	G	45.9146	6.45534	18.9024
2020-06-27	G	41.0221	5.70948	17.0552
2020-06-28	G	36.1618	4.96035	15.2397
2020-06-29	G	34.9958	4.79368	14.366
2020-06-30	G	31.6631	4.34695	13.1206
2020-07-01	G	28.8064	3.8776	11.8792
2020-07-02	G	26.6912	3.63624	11.027
2020-07-03	G	25.5449	3.58487	10.5153
2020-07-04	G	22.2289	3.05118	9.30052
2020-07-05	G	19.72	2.68131	8.35463
2020-07-06	G	18.2362	2.50067	7.7263
2020-07-07	G	16.631	2.27525	7.05951
2020-07-08	G	14.9218	2.02361	6.3764
2020-07-09	G	13.4568	1.81392	5.77869
2020-07-10	G	12.5344	1.71405	5.37268
2020-07-11	G	11.0771	1.49216	4.80076
2020-07-12	G	9.82801	1.31835	4.31767
2020-07-13	G	9.09067	1.24838	4.01196
2020-07-14	G	7.792	1.04032	3.51047
2020-07-15	G	7.34553	0.994508	3.27099
2020-07-16	G	6.6295	0.892542	2.96178
2020-07-17	G	6.34909	0.882452	2.80823
2020-07-18	G	6.44208	0.93783	2.77353
2020-07-19	G	6.18845	0.909097	2.62617
2020-07-20	G	5.30438	0.757581	2.2979
2020-07-21	G	4.87995	0.695104	2.11033
2020-07-22	G	4.51615	0.643041	1.94621
2020-07-23	G	3.87098	0.535868	1.70293
2020-07-24	G	3.31799	0.446556	1.49006
2020-07-25	G	2.84399	0.37213	1.30381
2020-07-26	G	3.10437	0.437682	1.34016
2020-07-27	G	2.99422	0.364735	1.17264
2020-07-28	G	3.23316	0.431523	1.2254
2020-07-29	G	2.77128	0.359602	1.07223
2020-07-30	G	3.04205	0.449429	1.1722
2020-07-31	G	3.27414	0.502097	1.22501
2020-08-01	G	3.13974	0.4822	1.17155
2020-08-02	G	3.6912	0.61538	1.35877
2020-08-03	G	3.83056	0.640391	1.38826
2020-08-04	G	3.28334	0.533659	1.21473
2020-08-05	G	2.81429	0.444716	1.06289
2020-08-06	G	2.74557	0.434382	1.02969
2020-08-07	G	3.02002	0.500653	1.11765
2020-08-08	G	2.92192	0.480997	1.07761
2020-08-09	G	2.5045	0.400831	0.942906
2020-08-10	G	2.81339	0.483786	1.05904
2020-08-11	G	2.41147	0.403155	0.926663
2020-08-12	G	2.06698	0.335963	0.81083
2020-08-13	G	2.43837	0.407543	0.908811
2020-08-14	G	2.42338	0.403409	0.894881
2020-08-15	G	2.07718	0.336174	0.783021
2020-08-16	G	1.78044	0.280145	0.685143
2020-08-17	G	1.52609	0.233454	0.5995
2020-08-18	G	1.97474	0.333211	0.741228
2020-08-19	G	1.69263	0.277676	0.648574
2020-08-20	G	1.45083	0.231396	0.567502
2020-08-21	G	1.24357	0.19283	0.496565
2020-08-22	G	1.06591	0.160692	0.434494
2020-08-23	G	0.913641	0.13391	0.380182
2020-08-24	G	0.783121	0.111592	0.332659
2020-08-25	G	0.671247	0.092993	0.291077
2020-08-26	G	0.575354	0.0774941	0.254692
2020-08-27	G	0.826494	0.139458	0.339856
2020-08-28	G	1.37508	0.243788	0.496706
2020-08-29	G	1.17864	0.203156	0.434617
2020-08-30	G	1.01027	0.169297	0.38029
2020-08-31	G	1.53261	0.279747	0.54942
2020-09-01	G	2.31366	0.382883	0.714743
2020-09-02	G	2.31647	0.382855	0.725065
2020-09-03	G	2.31888	0.393925	0.751432
2020-09-04	G	1.98761	0.328271	0.657503
2020-09-05	G	2.037	0.348439	0.692315
2020-09-06	G	2.07933	0.354153	0.705442
2020-09-07	G	2.11562	0.358914	0.716928
2020-09-08	G	1.81339	0.299095	0.627312
2020-09-09	G	1.55433	0.249246	0.548898
2020-09-10	G	1.66562	0.282585	0.597286
2020-09-11	G	1.76101	0.299275	0.622293
2020-09-12	G	1.84277	0.324276	0.661506
2020-09-13	G	1.57952	0.27023	0.578818
2020-09-14	G	1.6872	0.288978	0.606132
2020-09-15	G	1.77951	0.315695	0.647366
2020-09-16	G	1.85862	0.326865	0.66611
2020-09-17	G	1.92643	0.336173	0.682512
2020-09-18	G	1.98456	0.280144	0.597198
2020-09-19	G	2.03438	0.297239	0.622213
2020-09-20	G	1.74375	0.247699	0.544436
2020-09-21	G	2.16131	0.333989	0.675715
2020-09-22	G	2.85256	0.480778	0.907585
2020-09-23	G	2.44505	0.400649	0.794137
2020-09-24	G	2.42909	0.397661	0.794536
2020-09-25	G	2.41541	0.39517	0.794886
2020-09-26	G	2.4037	0.393098	0.795196
2020-09-27	G	2.06031	0.327582	0.695797
2020-09-28	G	1.76598	0.272985	0.608822
2020-09-29	G	1.5137	0.227487	0.532719
2020-09-30	G	2.63079	0.403119	0.799796
2020-02-18	H	0	0	0
2020-02-19	H	0	0	0
2020-02-20	H	0	0	0
2020-02-21	H	0	0	0
2020-02-22	H	0	0	0
2020-02-23	H	0	0	0
2020-02-24	H	0	0	0
2020-02-25	H	0	0	0
2020-02-26	H	0.333333	0.0637867	0.0996667
2020-02-27	H	0.952381	0.180729	0.286542
2020-02-28	H	1.14966	0.214394	0.350391
2020-02-29	H	0.985423	0.178662	0.306592
2020-03-01	H	3.17798	0.639765	1.03527
2020-03-02	H	3.39065	0.660711	1.10519
2020-03-03	H	3.57294	0.625472	1.08404
2020-03-04	H	3.72919	0.659894	1.1652
2020-03-05	H	3.52978	0.624791	1.13655
2020-03-06	H	4.35886	0.775806	1.39315
2020-03-07	H	4.73616	0.848958	1.53534
2020-03-08	H	5.72624	1.03749	1.85909
2020-03-09	H	6.24154	1.13082	2.0427
2020-03-10	H	6.68322	1.19749	2.18603
2020-03-11	H	8.06181	1.4666	2.64511
2020-03-12	H	8.24345	1.48841	2.73047
2020-03-13	H	11.3992	2.09176	3.7195
2020-03-14	H	13.7707	2.54185	4.50256
2020-03-15	H	15.1368	2.78935	4.98841
2020-03-16	H	19.9744	3.67785	6.47952
2020-03-17	H	22.7876	4.10765	7.29892
2020-03-18	H	23.5322	4.21067	7.61722
2020-03-19	H	25.8371	4.65982	8.4634
2020-03-20	H	28.4794	5.109	9.32081
2020-03-21	H	31.7443	5.50273	10.1014
2020-03-22	H	36.2094	6.40768	11.6857
2020-03-23	H	38.37	6.67094	12.305
2020-03-24	H	45.2219	7.87207	14.3809
2020-03-25	H	52.4283	9.18918	16.6913
2020-03-26	H	58.2718	10.309	18.7475
2020-03-27	H	63.9473	11.3059	20.6464
2020-03-28	H	70.1453	12.3807	22.6893
2020-03-29	H	82.7912	14.48	26.3575
2020-03-30	H	84.6306	14.6431	27.0884
2020-03-31	H	92.8738	16.0659	29.7387
2020-04-01	H	97.9395	16.7606	31.2907
2020-04-02	H	112.615	19.5055	36.033
2020-04-03	H	123.86	21.7291	40.0829
2020-04-04	H	139.166	24.5917	45.2039
2020-04-05	H	157.618	27.9367	51.1841
2020-04-06	H	165.102	29.0519	53.8037
2020-04-07	H	182.182	32.1305	59.4543
2020-04-08	H	198.156	35.0067	64.8838
2020-04-09	H	221.515	39.3643	72.6983
2020-04-10	H	248.87	44.4321	81.7807
2020-04-11	H	266.317	47.1189	87.3271
2020-04-12	H	282.272	49.4328	92.2972
2020-04-13	H	310.947	54.4977	101.547
2020-04-14	H	342.526	60.119	111.829
2020-04-15	H	372.927	65.6492	122.147
2020-04-16	H	392.652	68.8295	128.944
2020-04-17	H	416.225	72.786	136.933
2020-04-18	H	444.098	77.7942	146.596
2020-04-19	H	478.989	83.6871	157.738
2020-04-20	H	509.895	88.8198	167.834
2020-04-21	H	558.72	97.4429	183.459
2020-04-22	H	592.236	103.3	195.054
2020-04-23	H	614.964	106.881	203.168
2020-04-24	H	641.445	111.129	212.244
2020-04-25	H	690.81	119.781	228.171
2020-04-26	H	709.456	122.459	235.027
2020-04-27	H	728.106	125.287	241.958
2020-04-28	H	755.09	129.962	251.645
2020-04-29	H	769.22	132.197	257.525
2020-04-30	H	790.332	135.601	265.08
2020-05-01	H	806.761	138.005	271.014
2020-05-02	H	836.176	143.536	281.719
2020-05-03	H	840.055	143.927	284.494
2020-05-04	H	835.381	142.121	283.59
2020-05-05	H	833.041	141.078	283.523
2020-05-06	H	831.035	140.171	283.404
2020-05-07	H	839.649	141.644	286.783
2020-05-08	H	823.366	138.59	283.05
2020-05-09	H	807.742	135.496	278.925
2020-05-10	H	801.017	133.777	276.659
2020-05-11	H	802.919	133.681	276.765
2020-05-12	H	788.217	130.845	272.55
2020-05-13	H	767.281	126.986	266.527
2020-05-14	H	759.336	125.421	263.835
2020-05-15	H	747.526	123.557	260.604
2020-05-16	H	723.403	118.869	252.88
2020-05-17	H	688.06	112.27	241.914
2020-05-18	H	667.099	108.706	235.343
2020-05-19	H	643.799	104.38	227.475
2020-05-20	H	617.161	99.9681	219.329
2020-05-21	H	586.329	94.6303	209.606
2020-05-22	H	557.234	89.6496	200.266
2020-05-23	H	526.296	84.2372	190.122
2020-05-24	H	494.111	78.5703	179.439
2020-05-25	H	464.524	73.5069	169.559
2020-05-26	H	435.83	68.6272	159.882
2020-05-27	H	413.235	65.0407	152.164
2020-05-28	H	390.535	61.3918	144.38
2020-05-29	H	370.077	58.1486	137.253
2020-05-30	H	344.876	53.7626	128.386
2020-05-31	H	323.275	50.2767	120.892
2020-06-01	H	300.092	46.5426	113.038
2020-06-02	H	272.555	41.8334	103.671
2020-06-03	H	254.952	39.0378	97.2381
2020-06-04	H	241.197	36.9938	92.0557
2020-06-05	H	226.74	34.7718	86.7107
2020-06-06	H	210.682	32.1825	80.8812
2020-06-07	H	193.251	29.409	74.8184
2020-06-08	H	176.311	26.5626	68.6771
2020-06-09	H	159.79	23.8411	62.7575
2020-06-10	H	144.963	21.5094	57.4781
2020-06-11	H	130.921	19.2668	52.3907
2020-06-12	H	120.218	17.6864	48.3898
2020-06-13	H	111.71	16.4969	45.0884
2020-06-14	H	103.752	15.3782	42.0004
2020-06-15	H	95.5968	14.0825	38.7307
2020-06-16	H	89.6068	13.2386	36.238
2020-06-17	H	82.1391	12.0112	33.2379
2020-06-18	H	75.7383	10.9578	30.5652
2020-06-19	H	68.5852	9.85532	27.8755
2020-06-20	H	62.1207	8.88392	25.4398
2020-06-21	H	56.9129	8.06332	23.2911
2020-06-22	H	51.4492	7.263	21.2291
2020-06-23	H	45.766	6.4269	19.1604
2020-06-24	H	42.8946	6.11287	17.9484
2020-06-25	H	38.4335	5.43518	16.2378
2020-06-26	H	34.6097	4.88153	14.7584
2020-06-27	H	31.9987	4.47284	13.5463
2020-06-28	H	29.7608	4.19607	12.5853
2020-06-29	H	26.8426	3.75187	11.4108
2020-06-30	H	26.008	3.65904	10.8165
2020-07-01	H	22.6259	3.12408	9.58143
2020-07-02	H	21.7269	3.07209	9.11608
2020-07-03	H	18.9564	2.63496	8.09357
2020-07-04	H	17.5817	2.46204	7.49788
2020-07-05	H	15.7367	2.19037	6.77731
2020-07-06	H	13.8219	1.88909	6.02981
2020-07-07	H	13.1807	1.82939	5.67475
2020-07-08	H	11.6311	1.59937	5.0824
2020-07-09	H	10.3028	1.39659	4.54677
2020-07-10	H	9.83099	1.35519	4.27742
2020-07-11	H	9.09323	1.26799	3.95941
2020-07-12	H	8.46087	1.18423	3.66382
2020-07-13	H	7.58551	1.05065	3.30551
2020-07-14	H	6.8352	0.939327	2.99199
2020-07-15	H	5.85874	0.782772	2.61799
2020-07-16	H	5.02178	0.65231	2.29074
2020-07-17	H	5.30438	0.746044	2.32073
2020-07-18	H	4.87994	0.68549	2.13031
2020-07-19	H	4.18281	0.571242	1.86402
2020-07-20	H	3.58526	0.476035	1.63102
2020-07-21	H	3.07308	0.396696	1.42714
2020-07-22	H	2.63407	0.33058	1.24875
2020-07-23	H	2.59111	0.350363	1.20965
2020-07-24	H	2.22095	0.291969	1.05845
2020-07-25	H	1.90367	0.243308	0.92614
2020-07-26	H	1.63172	0.202756	0.810373
2020-07-27	H	1.73195	0.168964	0.709076
2020-07-28	H	1.81787	0.204591	0.72011
2020-07-29	H	2.22484	0.320252	0.864096
2020-07-30	H	1.907	0.266877	0.756084
2020-07-31	H	1.63457	0.222397	0.661573
2020-08-01	H	1.7344	0.249119	0.678545
2020-08-02	H	2.1533	0.357359	0.827727
2020-08-03	H	1.84568	0.297799	0.724261
2020-08-04	H	1.58201	0.248166	0.633729
2020-08-05	H	1.35601	0.206805	0.554513
2020-08-06	H	1.1623	0.172338	0.485198
2020-08-07	H	0.996254	0.143615	0.424549
2020-08-08	H	1.18727	0.183465	0.471147
2020-08-09	H	1.01766	0.152888	0.412253
2020-08-10	H	0.872276	0.127407	0.360722
2020-08-11	H	1.081	0.106172	0.315631
2020-08-12	H	1.25991	0.152264	0.375845
2020-08-13	H	1.07992	0.126887	0.328864
2020-08-14	H	0.925645	0.105739	0.287756
2020-08-15	H	0.79341	0.0881157	0.251787
2020-08-16	H	0.680066	0.0734297	0.220313
2020-08-17	H	0.916251	0.124979	0.292442
2020-08-18	H	0.785358	0.104149	0.255887
2020-08-19	H	0.673164	0.0867909	0.223901
2020-08-20	H	0.576998	0.0723258	0.195913
2020-08-21	H	0.49457	0.0602715	0.171424
2020-08-22	H	0.423917	0.0502262	0.149996
2020-08-23	H	0.363357	0.0418552	0.131247
2020-08-24	H	0.978118	0.173546	0.331508
2020-08-25	H	1.50505	0.283288	0.506736
2020-08-26	H	1.29004	0.236074	0.443394
2020-08-27	H	1.43909	0.260516	0.487638
2020-08-28	H	1.23351	0.217096	0.426683
2020-08-29	H	1.39063	0.244701	0.473016
2020-08-30	H	1.19197	0.203918	0.413889
2020-08-31	H	1.35502	0.233718	0.461819
2020-09-01	H	1.49478	0.269645	0.521092
2020-09-02	H	1.28124	0.224704	0.455955
2020-09-03	H	1.0982	0.187253	0.398961
2020-09-04	H	0.941318	0.156044	0.349091
2020-09-05	H	0.806844	0.130037	0.305454
2020-09-06	H	1.02491	0.183244	0.384272
2020-09-07	H	0.878497	0.152703	0.336238
2020-09-08	H	1.08633	0.191039	0.393875
2020-09-09	H	0.931141	0.1592	0.344641
2020-09-10	H	0.798121	0.132666	0.301561
2020-09-11	H	0.684103	0.110555	0.263866
2020-09-12	H	0.919712	0.155917	0.33055
2020-09-13	H	0.788325	0.129931	0.289232
2020-09-14	H	0.675707	0.108276	0.253078
2020-09-15	H	0.579177	0.0902297	0.221443
2020-09-16	H	0.829766	0.138977	0.293428
2020-09-17	H	0.711228	0.115814	0.256749
2020-09-18	H	0.942957	0.160298	0.324322
2020-09-19	H	0.808249	0.133582	0.283782
2020-09-20	H	0.692785	0.111318	0.248309
2020-09-21	H	0.927148	0.167645	0.33427
2020-09-22	H	0.794699	0.139704	0.292487
2020-09-23	H	0.68117	0.11642	0.255926
2020-09-24	H	0.917193	0.171897	0.340935
2020-09-25	H	1.1195	0.207034	0.397985
2020-09-26	H	0.95957	0.172528	0.348237
2020-09-27	H	0.822489	0.143774	0.304707
2020-09-28	H	0.70499	0.119811	0.266619
2020-09-29	H	0.604278	0.0998428	0.233291
2020-09-30	H	0.517952	0.0832023	0.20413
2020-02-18	I	0	0	0
2020-02-19	I	0	0	0
2020-02-20	I	0	0	0
2020-02-21	I	0	0	0
2020-02-22	I	0	0	0
2020-02-23	I	0	0	0
2020-02-24	I	0	0	0
2020-02-25	I	0.333333	0.0637867	0.0996667
2020-02-26	I	0.619048	0.128036	0.204208
2020-02-27	I	1.53061	0.298056	0.477682
2020-02-28	I	1.97862	0.387047	0.634639
2020-02-29	I	3.36263	0.588779	0.971309
2020-03-01	I	4.21558	0.745796	1.24856
2020-03-02	I	4.94669	0.887737	1.50849
2020-03-03	I	4.90669	0.867354	1.51926
2020-03-04	I	4.8724	0.850368	1.52869
2020-03-05	I	7.50968	1.30491	2.26927
2020-03-06	I	8.43687	1.51452	2.65294
2020-03-07	I	8.56493	1.51724	2.71999
2020-03-08	I	9.00804	1.5944	2.89566
2020-03-09	I	10.0545	1.77517	3.23137
2020-03-10	I	10.9515	1.88422	3.46012
2020-03-11	I	13.0537	2.29402	4.1586
2020-03-12	I	14.1888	2.50795	4.57044
2020-03-13	I	15.4952	2.75001	5.03047
2020-03-14	I	18.6149	3.20688	5.83166
2020-03-15	I	22.9557	4.03688	7.2347
2020-03-16	I	25.0096	4.37633	7.91203
2020-03-17	I	25.7701	4.43457	8.1537
2020-03-18	I	27.422	4.74934	8.78115
2020-03-19	I	31.8379	5.50253	10.0972
2020-03-20	I	38.2897	6.81243	12.3147
2020-03-21	I	42.153	7.42145	13.501
2020-03-22	I	46.1312	8.06764	14.7557
2020-03-23	I	52.8743	9.1386	16.6856
2020-03-24	I	58.3209	10.0533	18.4089
2020-03-25	I	68.3226	11.6031	21.1475
2020-03-26	I	78.5623	13.4049	24.341
2020-03-27	I	90.3391	15.353	27.8331
2020-03-28	I	102.767	17.5171	31.7336
2020-03-29	I	122.753	21.2592	38.1756
2020-03-30	I	139.216	24.1778	43.5003
2020-03-31	I	156.662	27.4531	49.4767
2020-04-01	I	169.948	29.6806	53.9218
2020-04-02	I	181.337	31.4703	57.7073
2020-04-03	I	199.431	34.7643	63.8362
2020-04-04	I	219.274	38.1139	70.1437
2020-04-05	I	244.95	42.4916	78.1414
2020-04-06	I	261.957	45.5573	84.2294
2020-04-07	I	287.868	50.0174	92.5334
2020-04-08	I	327.41	57.3643	105.472
2020-04-09	I	351.637	61.0352	112.962
2020-04-10	I	387.404	67.156	124.3
2020-04-11	I	415.394	71.7963	133.502
2020-04-12	I	454.385	78.3339	145.726
2020-04-13	I	489.473	84.3422	157.298
2020-04-14	I	530.548	91.7424	171.162
2020-04-15	I	580.422	100.253	186.956
2020-04-16	I	631.505	108.773	203.007
2020-04-17	I	665.956	114.686	215.196
2020-04-18	I	720.153	124.456	233.429
2020-04-19	I	767.941	132.717	249.568
2020-04-20	I	824.235	143.142	269.224
2020-04-21	I	876.154	151.678	286.184
2020-04-22	I	919.989	158.774	300.998
2020-04-23	I	964.229	165.392	315.062
2020-04-24	I	1013.15	174.013	332.22
2020-04-25	I	1046.08	179.276	344.231
2020-04-26	I	1084.31	185.622	357.804
2020-04-27	I	1128.74	192.557	372.255
2020-04-28	I	1165.16	198.961	385.874
2020-04-29	I	1194.37	203.249	396.153
2020-04-30	I	1224.75	207.693	406.507
2020-05-01	I	1230.45	207.964	410.203
2020-05-02	I	1243.67	209.323	415.209
2020-05-03	I	1251.67	210.45	419.58
2020-05-04	I	1252.53	209.723	420.801
2020-05-05	I	1250.6	209.239	422.06
2020-05-06	I	1250.27	209.182	423.703
2020-05-07	I	1250.33	209.066	425.033
2020-05-08	I	1229.71	204.853	419.765
2020-05-09	I	1204.37	199.767	412.695
2020-05-10	I	1191.98	197.642	409.81
2020-05-11	I	1172.37	194.257	404.764
2020-05-12	I	1149.22	190.366	398.677
2020-05-13	I	1103.05	181.244	384.163
2020-05-14	I	1068.8	174.804	373.279
2020-05-15	I	1037.78	169.545	363.925
2020-05-16	I	1000.53	162.851	352.126
2020-05-17	I	964.595	156.487	340.576
2020-05-18	I	927.462	149.295	327.518
2020-05-19	I	888.968	142.664	315.096
2020-05-20	I	836.972	133.585	298.676
2020-05-21	I	799.071	127.004	285.846
2020-05-22	I	752.918	119.304	271.158
2020-05-23	I	717.025	113.117	258.666
2020-05-24	I	670.26	105.033	243.159
2020-05-25	I	631.175	98.7793	230.344
2020-05-26	I	594.341	92.9878	218.226
2020-05-27	I	552.435	85.7988	203.93
2020-05-28	I	515.182	79.733	191.305
2020-05-29	I	483.251	74.5423	180.045
2020-05-30	I	452.882	69.6926	169.374
2020-05-31	I	422.851	64.6777	158.515
2020-06-01	I	394.111	60.2351	148.603
2020-06-02	I	364.809	55.4597	138.252
2020-06-03	I	335.36	50.3043	127.358
2020-06-04	I	312.785	46.9455	119.29
2020-06-05	I	288.101	43.0622	110.536
2020-06-06	I	264.611	39.4988	102.366
2020-06-07	I	243.143	36.0884	94.5273
2020-06-08	I	220.408	32.492	86.4901
2020-06-09	I	202.921	29.7918	79.9212
2020-06-10	I	188.599	27.7024	74.4247
2020-06-11	I	171.99	25.1737	68.3846
2020-06-12	I	156.753	22.789	62.6662
2020-06-13	I	144.693	20.971	57.9269
2020-06-14	I	137.356	20.1161	54.8114
2020-06-15	I	128.4	18.8711	51.2533
2020-06-16	I	118.724	17.3761	47.425
2020-06-17	I	109.097	15.8002	43.5595
2020-06-18	I	100.512	14.6062	40.3636
2020-06-19	I	93.1528	13.5446	37.4631
2020-06-20	I	85.8452	12.5241	34.7129
2020-06-21	I	81.2483	11.9815	32.7875
2020-06-22	I	75.3081	11.0911	30.418
2020-06-23	I	68.5498	9.98863	27.7814
2020-06-24	I	62.0903	8.995	25.3574
2020-06-25	I	55.8869	8.02832	23.0197
2020-06-26	I	51.2364	7.36141	21.1909
2020-06-27	I	47.2503	6.79457	19.5734
2020-06-28	I	43.8335	6.3	18.1234
2020-06-29	I	39.5716	5.67709	16.5253
2020-06-30	I	35.2519	4.99715	14.8756
2020-07-01	I	34.2159	4.92973	14.2122
2020-07-02	I	30.9946	4.46032	12.986
2020-07-03	I	27.9001	3.97208	11.7614
2020-07-04	I	27.2477	3.85364	11.1406
2020-07-05	I	23.6885	3.27516	9.84767
2020-07-06	I	21.3044	2.94284	8.95037
2020-07-07	I	18.5943	2.51616	7.93124
2020-07-08	I	17.938	2.5017	7.57251
2020-07-09	I	16.7087	2.36209	7.05928
2020-07-10	I	14.6551	2.03219	6.27653
2020-07-11	I	12.8948	1.75728	5.59163
2020-07-12	I	12.0527	1.65576	5.19168
2020-07-13	I	10.6642	1.44359	4.64239
2020-07-14	I	10.1408	1.41653	4.39575
2020-07-15	I	9.6921	1.3829	4.16262
2020-07-16	I	8.30751	1.15242	3.64229
2020-07-17	I	8.12072	1.09901	3.40367
2020-07-18	I	8.62729	1.25697	3.51121
2020-07-19	I	7.72815	1.11126	3.17198
2020-07-20	I	6.95747	0.989836	2.87515
2020-07-21	I	6.63021	0.974623	2.74976
2020-07-22	I	5.68304	0.812186	2.40604
2020-07-23	I	5.53784	0.804395	2.30461
2020-07-24	I	4.74672	0.670329	2.01654
2020-07-25	I	5.73529	0.899729	2.29747
2020-07-26	I	5.58263	0.877347	2.20962
2020-07-27	I	5.11845	0.79491	2.03309
2020-07-28	I	5.05392	0.79	1.97829
2020-07-29	I	5.33193	0.860787	2.04733
2020-07-30	I	5.23689	0.855989	2.00808
2020-07-31	I	4.8221	0.777111	1.85674
2020-08-01	I	4.46656	0.711379	1.72431
2020-08-02	I	3.82848	0.592816	1.50878
2020-08-03	I	3.61489	0.5578	1.41984
2020-08-04	I	3.43181	0.528621	1.34203
2020-08-05	I	2.94155	0.440517	1.17428
2020-08-06	I	3.188	0.505764	1.24416
2020-08-07	I	2.73257	0.42147	1.08864
2020-08-08	I	2.67554	0.415012	1.05223
2020-08-09	I	2.29332	0.345843	0.920698
2020-08-10	I	2.63237	0.437962	1.03961
2020-08-11	I	2.25631	0.364969	0.909659
2020-08-12	I	1.93398	0.304141	0.795952
2020-08-13	I	2.65769	0.444808	0.995455
2020-08-14	I	2.27802	0.370674	0.871023
2020-08-15	I	2.28592	0.372681	0.861812
2020-08-16	I	2.29269	0.310568	0.754085
2020-08-17	I	1.96517	0.258807	0.659825
2020-08-18	I	2.3511	0.343247	0.776682
2020-08-19	I	2.6819	0.424706	0.896264
2020-08-20	I	2.29877	0.353922	0.784231
2020-08-21	I	2.30371	0.369815	0.803202
2020-08-22	I	2.64127	0.435751	0.902133
2020-08-23	I	2.59728	0.438006	0.906367
2020-08-24	I	2.22624	0.365005	0.793071
2020-08-25	I	1.9082	0.304171	0.693937
2020-08-26	I	1.6356	0.253476	0.607195
[truncated: 1,165 more rows]
