# Supplementary material for: The impact of social distancing on COVID19 spread: State of Georgia case study
Source: PLoS One. 2020 Oct 12;15(10):e0239798. doi: 10.1371/journal.pone.0239798 (PMC7549801; doi:10.1371/journal.pone.0239798)
Supplement: S7 Dataset — The number of people that need hospital beds, ICU beds, and ventilators is recorded for each hospital region under Scenario 4. (XLSX) [file pone.0239798.s011.xlsx]

## Sheet: Sheet1
Date	Region	Curr_Hosp	Curr_Vent	Curr_ICU
2020-02-18	A	0	0	0
2020-02-19	A	0	0	0
2020-02-20	A	0	0	0
2020-02-21	A	0	0	0
2020-02-22	A	0	0	0
2020-02-23	A	0.333333	0.0637867	0.0996667
2020-02-24	A	0.285714	0.0531556	0.0872083
2020-02-25	A	0.911565	0.17187	0.275641
2020-02-26	A	0.781341	0.143225	0.241186
2020-02-27	A	1.00305	0.183141	0.310704
2020-02-28	A	1.52643	0.28019	0.471199
2020-02-29	A	1.6417	0.297279	0.511966
2020-03-01	A	3.07384	0.588852	0.98097
2020-03-02	A	2.63472	0.49071	0.858349
2020-03-03	A	3.59166	0.675165	1.16706
2020-03-04	A	4.4119	0.828878	1.43717
2020-03-05	A	5.11496	0.956971	1.67353
2020-03-06	A	6.05092	1.07481	1.89767
2020-03-07	A	6.85317	1.10922	1.99413
2020-03-08	A	7.20748	1.19059	2.16086
2020-03-09	A	7.51117	1.2584	2.30675
2020-03-10	A	9.10482	1.58115	2.85041
2020-03-11	A	10.1375	1.72253	3.12678
2020-03-12	A	11.6893	2.03171	3.66759
2020-03-13	A	14.3527	2.37533	4.27515
2020-03-14	A	15.3023	2.56461	4.65509
2020-03-15	A	16.4496	2.81942	5.1392
2020-03-16	A	20.433	3.63912	6.5118
2020-03-17	A	21.514	3.77862	6.86349
2020-03-18	A	24.7739	4.44955	8.03789
2020-03-19	A	25.2348	4.4207	8.14682
2020-03-20	A	26.2965	4.61021	8.5758
2020-03-21	A	27.8732	4.76814	8.95116
2020-03-22	A	30.2246	5.16598	9.6956
2020-03-23	A	32.2401	5.5613	10.4466
2020-03-24	A	32.9677	5.6245	10.6878
2020-03-25	A	33.9247	5.66607	10.8815
2020-03-26	A	34.0783	5.65911	10.986
2020-03-27	A	35.5433	5.95006	11.5411
2020-03-28	A	37.4657	6.35337	12.2781
2020-03-29	A	39.4468	6.71165	12.9577
2020-03-30	A	38.4782	6.51933	12.7853
2020-03-31	A	43.3147	7.46563	14.3635
2020-04-01	A	49.7935	8.74509	16.5114
2020-04-02	A	51.3468	8.9488	17.0431
2020-04-03	A	51.6782	8.86342	17.1097
2020-04-04	A	54.2956	9.27205	17.9177
2020-04-05	A	58.5391	10.1007	19.3873
2020-04-06	A	60.843	10.5693	20.3266
2020-04-07	A	57.4845	9.86165	19.4324
2020-04-08	A	56.9391	9.75169	19.3997
2020-04-09	A	58.1383	9.99009	19.8867
2020-04-10	A	56.8328	9.70065	19.5502
2020-04-11	A	57.3805	9.84217	19.8538
2020-04-12	A	56.1833	9.5441	19.4694
2020-04-13	A	55.1571	9.22083	19.016
2020-04-14	A	53.9442	8.90984	18.5544
2020-04-15	A	54.2379	8.98071	18.6661
2020-04-16	A	53.4896	8.90109	18.5472
2020-04-17	A	52.1816	8.70718	18.2438
2020-04-18	A	53.7271	9.04756	18.7626
2020-04-19	A	51.7184	8.624	18.1116
2020-04-20	A	50.6634	8.49846	17.8973
2020-04-21	A	52.0925	8.77655	18.3078
2020-04-22	A	51.6507	8.55902	17.965
2020-04-23	A	51.6053	8.61348	18.0334
2020-04-24	A	50.2331	8.32883	17.5776
2020-04-25	A	47.7237	7.88917	16.8624
2020-04-26	A	45.2393	7.43682	16.1022
2020-04-27	A	43.7766	7.11255	15.5195
2020-04-28	A	43.8561	7.20563	15.5772
2020-04-29	A	41.9243	6.72853	14.761
2020-04-30	A	40.2684	6.4502	14.2332
2020-05-01	A	40.8491	6.5372	14.2698
2020-05-02	A	41.0135	6.65129	14.3667
2020-05-03	A	40.8211	6.59661	14.2175
2020-05-04	A	39.6562	6.46784	13.957
2020-05-05	A	38.6577	6.27456	13.5947
2020-05-06	A	38.8018	6.37973	13.6937
2020-05-07	A	36.5921	5.98759	13.0307
2020-05-08	A	35.6979	5.87435	12.7842
2020-05-09	A	35.5982	5.90756	12.7678
2020-05-10	A	33.8461	5.58302	12.2032
2020-05-11	A	33.3443	5.52612	12.0428
2020-05-12	A	33.2475	5.53139	11.9848
2020-05-13	A	31.1645	5.13088	11.3013
2020-05-14	A	30.3791	5.01067	11.037
2020-05-15	A	30.7059	5.07134	11.057
2020-05-16	A	32.6527	5.48244	11.6379
2020-05-17	A	30.3213	5.03739	10.9155
2020-05-18	A	32.3231	5.46524	11.5314
2020-05-19	A	33.3721	5.71639	11.9056
2020-05-20	A	31.938	5.34883	11.3318
2020-05-21	A	33.0421	5.5972	11.6963
2020-05-22	A	30.6551	5.16631	11.0186
2020-05-23	A	30.6092	5.17886	11.0063
2020-05-24	A	29.9031	5.02014	10.7312
2020-05-25	A	29.6312	4.98217	10.6378
2020-05-26	A	29.3982	4.93944	10.5387
2020-05-27	A	29.1985	4.9371	10.504
2020-05-28	A	30.3606	5.04055	10.6384
2020-05-29	A	30.0234	5.01027	10.5739
2020-05-30	A	30.7343	5.15421	10.7818
2020-05-31	A	31.0104	5.14659	10.7644
2020-06-01	A	33.247	5.56733	11.4165
2020-06-02	A	37.1641	6.35336	12.6675
2020-06-03	A	38.5216	6.61457	13.1467
2020-06-04	A	36.6852	6.1722	12.5347
2020-06-05	A	35.7778	6.00601	12.3155
2020-06-06	A	36.3333	6.12266	12.5224
2020-06-07	A	36.1428	6.07011	12.4695
2020-06-08	A	34.9796	5.77117	12.0244
2020-06-09	A	36.6492	6.1516	12.6187
2020-06-10	A	37.7469	6.39375	13.0217
2020-06-11	A	38.6878	6.54284	13.292
2020-06-12	A	39.8277	6.78357	13.7105
2020-06-13	A	41.8047	7.08956	14.2414
2020-06-14	A	48.1659	8.31245	16.2182
2020-06-15	A	47.6184	8.14176	16.0889
2020-06-16	A	48.4824	8.27408	16.4048
2020-06-17	A	52.8897	9.14147	17.8642
2020-06-18	A	56.6674	9.78941	19.0242
2020-06-19	A	60.572	10.5013	20.3078
2020-06-20	A	61.9189	10.6453	20.729
2020-06-21	A	66.0733	11.2977	21.9295
2020-06-22	A	70.6343	12.0855	23.3614
2020-06-23	A	73.877	12.778	24.6705
2020-06-24	A	79.9898	13.8737	26.6264
2020-06-25	A	82.5627	14.307	27.5881
2020-06-26	A	88.1014	15.2866	29.3959
2020-06-27	A	90.8488	15.7618	30.4447
2020-06-28	A	93.5371	16.2437	31.4968
2020-06-29	A	96.1746	16.6564	32.4347
2020-06-30	A	98.4354	17.0114	33.2727
2020-07-01	A	106.707	18.6829	36.1553
2020-07-02	A	111.796	19.5848	37.9105
2020-07-03	A	116.825	20.2616	39.3294
2020-07-04	A	127.136	22.2206	42.7506
2020-07-05	A	132.974	23.2235	44.7604
2020-07-06	A	144.311	25.4265	48.6553
2020-07-07	A	156.362	27.548	52.5098
2020-07-08	A	160.358	28.0901	53.967
2020-07-09	A	169.783	29.6706	57.0058
2020-07-10	A	181.195	31.6228	60.6571
2020-07-11	A	187.31	32.731	63.0416
2020-07-12	A	193.885	33.8875	65.4921
2020-07-13	A	196.853	34.2854	66.7522
2020-07-14	A	199.065	34.4506	67.5949
2020-07-15	A	207.294	35.6921	70.0569
2020-07-16	A	213.014	36.6823	72.1417
2020-07-17	A	220.25	37.9263	74.6204
2020-07-18	A	230.119	39.8032	78.1022
2020-07-19	A	239.245	41.2286	80.932
2020-07-20	A	249.734	43.0544	84.4049
2020-07-21	A	256.724	43.9795	86.5119
2020-07-22	A	265.049	45.3357	89.2699
2020-07-23	A	279.518	48.1298	94.2832
2020-07-24	A	283.92	48.8054	96.0871
2020-07-25	A	294.694	50.5192	99.4639
2020-07-26	A	306.928	52.7379	103.654
2020-07-27	A	314.748	54.0626	106.501
2020-07-28	A	326.45	55.9319	110.188
2020-07-29	A	333.481	57.1431	112.872
2020-07-30	A	344.174	58.7958	116.227
2020-07-31	A	353.34	60.0343	118.945
2020-08-01	A	362.863	61.6905	122.298
2020-08-02	A	372.025	63.2814	125.562
2020-08-03	A	373.212	63.2731	126.334
2020-08-04	A	386.896	65.7207	130.843
2020-08-05	A	399.959	67.9489	135.084
2020-08-06	A	414.155	70.7209	140.225
2020-08-07	A	425.323	72.5345	143.948
2020-08-08	A	424.896	72.3292	144.523
2020-08-09	A	429.197	73.0705	146.451
2020-08-10	A	430.55	73.1141	147.242
2020-08-11	A	438.376	74.038	149.32
2020-08-12	A	451.084	76.3415	153.535
2020-08-13	A	453.643	76.8384	155
2020-08-14	A	459.837	77.846	157.21
2020-08-15	A	453.146	76.5113	155.745
2020-08-16	A	458.078	77.4653	157.693
2020-08-17	A	463.971	78.6512	160.007
2020-08-18	A	474.356	80.6269	163.575
2020-08-19	A	477.925	80.9892	164.691
2020-08-20	A	484.316	81.7265	166.348
2020-08-21	A	487.462	81.9915	167.251
2020-08-22	A	489.824	82.3843	168.311
2020-08-23	A	491.849	82.817	169.402
2020-08-24	A	482.918	81.2334	167.319
2020-08-25	A	486.263	81.5668	168.08
2020-08-26	A	487.797	81.839	168.737
2020-08-27	A	489.779	81.7968	168.891
2020-08-28	A	486.81	81.4566	168.549
2020-08-29	A	475.599	79.1263	165.052
2020-08-30	A	470.323	78.0886	163.405
2020-08-31	A	456.134	75.643	159.494
2020-09-01	A	440.972	72.737	154.715
2020-09-02	A	421.643	69.1671	148.74
2020-09-03	A	415.408	68.067	146.44
2020-09-04	A	409.064	67.0642	144.294
2020-09-05	A	406.293	66.8887	143.448
2020-09-06	A	392.918	64.4433	139.115
2020-09-07	A	384.787	62.974	136.212
2020-09-08	A	381.151	62.3958	134.681
2020-09-09	A	372.7	61.2428	132.294
2020-09-10	A	365.458	60.0351	129.819
2020-09-11	A	362.249	59.5418	128.455
2020-09-12	A	348.833	57.2254	124.284
2020-09-13	A	341.666	56.1132	121.913
2020-09-14	A	336.19	55.1975	119.856
2020-09-15	A	325.496	53.2918	116.271
2020-09-16	A	312.663	51.0658	112.137
2020-09-17	A	307.997	50.2536	110.149
2020-09-18	A	299.664	48.7781	107.162
2020-09-19	A	295.855	48.0809	105.38
2020-09-20	A	281.59	45.5559	100.783
2020-09-21	A	270.363	43.6513	97.0729
2020-09-22	A	264.073	42.8186	95.0051
2020-09-23	A	259.015	42.1385	93.2175
2020-09-24	A	248.346	40.3764	89.7856
2020-09-25	A	243.535	39.7095	88.0351
2020-09-26	A	231.411	37.5452	83.99
2020-09-27	A	227.685	37.0368	82.4743
2020-09-28	A	218.826	35.562	79.5057
2020-09-29	A	209.898	33.8422	76.1411
2020-09-30	A	197.579	31.5548	71.8625
2020-02-18	B	0	0	0
2020-02-19	B	0	0	0
2020-02-20	B	0	0	0
2020-02-21	B	0.333333	0.0637867	0.0996667
2020-02-22	B	1.28571	0.244516	0.386208
2020-02-23	B	1.10204	0.203763	0.337932
2020-02-24	B	0.944606	0.169802	0.295691
2020-02-25	B	2.143	0.407742	0.674729
2020-02-26	B	1.83685	0.339785	0.590388
2020-02-27	B	1.57445	0.283154	0.51659
2020-02-28	B	2.34953	0.438415	0.768349
2020-02-29	B	2.01388	0.365346	0.672306
2020-03-01	B	3.39285	0.634482	1.10393
2020-03-02	B	4.90816	0.933641	1.59861
2020-03-03	B	5.54032	1.04427	1.81478
2020-03-04	B	6.08218	1.12538	1.9866
2020-03-05	B	6.87997	1.26784	2.25394
2020-03-06	B	8.89711	1.64171	2.88653
2020-03-07	B	9.29276	1.68702	3.02405
2020-03-08	B	8.96523	1.6194	2.97971
2020-03-09	B	11.6845	2.09553	3.77291
2020-03-10	B	12.3486	2.21496	4.03363
2020-03-11	B	13.5845	2.43098	4.44376
2020-03-12	B	15.9772	2.67477	4.90229
2020-03-13	B	18.0281	3.08039	5.61984
2020-03-14	B	18.1193	3.08838	5.73203
2020-03-15	B	18.8642	3.2337	6.04686
2020-03-16	B	20.1693	3.42969	6.43933
2020-03-17	B	22.9546	3.97573	7.38075
2020-03-18	B	23.3421	4.04804	7.60649
2020-03-19	B	24.3408	4.18318	7.92101
2020-03-20	B	26.1969	4.47606	8.47788
2020-03-21	B	28.7878	4.98637	9.38115
2020-03-22	B	30.3419	5.28406	9.97217
2020-03-23	B	32.0074	5.60701	10.6063
2020-03-24	B	33.7682	5.79016	11.0269
2020-03-25	B	36.9442	6.34769	12.0275
2020-03-26	B	39.9998	6.89828	13.0374
2020-03-27	B	45.6189	7.93118	14.8181
2020-03-28	B	46.1019	7.89614	14.9765
2020-03-29	B	48.1826	8.24134	15.7001
2020-03-30	B	50.966	8.62331	16.4806
2020-03-31	B	51.3518	8.64486	16.6998
2020-04-01	B	53.0158	8.94016	17.325
2020-04-02	B	53.7755	9.12245	17.7724
2020-04-03	B	56.0933	9.60439	18.6795
2020-04-04	B	61.0799	10.5801	20.3702
2020-04-05	B	63.0209	10.9688	21.1866
2020-04-06	B	64.6846	11.2263	21.797
2020-04-07	B	65.7773	11.3132	22.1317
2020-04-08	B	68.3805	11.76	23.0095
2020-04-09	B	70.6119	12.0464	23.6434
2020-04-10	B	69.5245	11.8386	23.5003
2020-04-11	B	68.9257	11.7403	23.4921
2020-04-12	B	68.7459	11.6056	23.4026
2020-04-13	B	67.925	11.4296	23.2246
2020-04-14	B	67.5548	11.3884	23.2335
2020-04-15	B	64.5708	10.8326	22.4266
2020-04-16	B	63.6797	10.6773	22.2016
2020-04-17	B	64.5826	10.9556	22.6418
2020-04-18	B	63.0232	10.7077	22.2772
2020-04-19	B	61.3532	10.3291	21.6896
2020-04-20	B	62.5885	10.5795	22.0594
2020-04-21	B	59.9806	10.0503	21.2303
2020-04-22	B	58.0786	9.57892	20.4572
2020-04-23	B	55.7817	9.18606	19.7807
2020-04-24	B	55.8128	9.29686	19.8734
2020-04-25	B	54.1729	8.86781	19.1399
2020-04-26	B	54.4339	8.95678	19.1958
2020-04-27	B	51.991	8.46515	18.3606
2020-04-28	B	50.2304	8.10816	17.7122
2020-04-29	B	50.3879	8.05749	17.5305
2020-04-30	B	51.1897	8.28151	17.7875
2020-05-01	B	50.5435	8.24355	17.6614
2020-05-02	B	48.323	7.88189	17.0354
2020-05-03	B	47.7531	7.76078	16.7693
2020-05-04	B	46.5979	7.59606	16.4368
2020-05-05	B	44.6077	7.26744	15.8469
2020-05-06	B	44.2352	7.15444	15.582
2020-05-07	B	43.2492	7.07137	15.3676
2020-05-08	B	41.7374	6.83019	14.9113
2020-05-09	B	40.1082	6.58761	14.4471
2020-05-10	B	38.7118	6.39656	14.0582
2020-05-11	B	39.1816	6.55628	14.2162
2020-05-12	B	38.5842	6.47583	14.0209
2020-05-13	B	39.7388	6.70554	14.3136
2020-05-14	B	40.3952	6.87755	14.5394
2020-05-15	B	39.9578	6.71028	14.2516
2020-05-16	B	38.2495	6.32683	13.6185
2020-05-17	B	36.7853	6.07108	13.1642
2020-05-18	B	35.8636	5.94393	12.901
2020-05-19	B	33.7402	5.54954	12.2201
2020-05-20	B	31.5869	5.16819	11.5419
2020-05-21	B	30.0745	4.892	11.0135
2020-05-22	B	29.4448	4.82269	10.8025
2020-05-23	B	28.5717	4.61518	10.3838
2020-05-24	B	26.8234	4.30358	9.80084
2020-05-25	B	28.3248	4.49042	9.98841
2020-05-26	B	28.9451	4.52965	9.97052
2020-05-27	B	28.8101	4.55124	9.93754
2020-05-28	B	28.6943	4.56923	9.90868
2020-05-29	B	30.5951	4.98913	10.5161
2020-05-30	B	31.2244	5.095	10.6663
2020-05-31	B	32.4304	5.36349	11.0793
2020-06-01	B	32.4642	5.38477	11.1244
2020-06-02	B	29.8264	4.88112	10.3492
2020-06-03	B	29.5655	4.86632	10.3035
2020-06-04	B	30.3419	5.03425	10.5453
2020-06-05	B	29.3407	4.86636	10.2758
2020-06-06	B	30.1491	4.99269	10.456
2020-06-07	B	31.1755	5.20335	10.7783
2020-06-08	B	34.0551	5.79489	11.7103
2020-06-09	B	37.5235	6.40433	12.7079
2020-06-10	B	39.8296	6.78462	13.3814
2020-06-11	B	44.1397	7.58132	14.7204
2020-06-12	B	47.5007	8.25633	15.9093
2020-06-13	B	48.7149	8.31686	16.1653
2020-06-14	B	51.4223	8.77221	17.022
2020-06-15	B	54.4096	9.18217	17.8193
2020-06-16	B	55.9701	9.52659	18.5212
2020-06-17	B	59.3077	10.1214	19.6164
2020-06-18	B	60.5018	10.3065	20.0893
2020-06-19	B	65.5254	11.3371	21.8725
2020-06-20	B	70.8313	12.2792	23.5628
2020-06-21	B	77.0459	13.3527	25.4924
2020-06-22	B	78.3726	13.5872	26.1495
2020-06-23	B	82.1766	14.2513	27.4568
2020-06-24	B	82.1037	14.092	27.4871
2020-06-25	B	83.7079	14.3419	28.1115
2020-06-26	B	91.7497	15.8065	30.6209
2020-06-27	B	99.6426	17.2295	33.133
2020-06-28	B	110.408	19.2223	36.592
2020-06-29	B	112.969	19.7044	37.777
2020-06-30	B	124.83	21.9448	41.6869
2020-07-01	B	131.331	23.0048	43.847
2020-07-02	B	136.236	23.7272	45.4858
2020-07-03	B	146.44	25.6605	48.9998
2020-07-04	B	148.187	25.7684	49.7258
2020-07-05	B	151.684	26.3187	51.0804
2020-07-06	B	155.348	26.8105	52.3177
2020-07-07	B	164.822	28.5904	55.541
2020-07-08	B	173.276	29.8795	58.058
2020-07-09	B	181.189	31.3421	60.8671
2020-07-10	B	187.305	32.3168	62.9437
2020-07-11	B	200.547	34.7487	67.2914
2020-07-12	B	204.231	35.2083	68.6473
2020-07-13	B	215.388	37.1999	72.3471
2020-07-14	B	223.285	38.7209	75.3677
2020-07-15	B	237.054	41.2308	79.9521
2020-07-16	B	245.856	42.7289	83.0361
2020-07-17	B	253.067	43.9247	85.6522
2020-07-18	B	257.581	44.3359	87.027
2020-07-19	B	264.784	45.3027	89.205
2020-07-20	B	272.624	46.6324	91.9297
2020-07-21	B	287.345	49.1356	96.4935
2020-07-22	B	297.629	50.9248	100.023
2020-07-23	B	306.11	52.5378	103.302
2020-07-24	B	311.047	53.3356	105.318
2020-07-25	B	320.945	54.9906	108.628
2020-07-26	B	335.096	57.504	113.298
2020-07-27	B	332.892	56.9777	113.288
2020-07-28	B	345.002	58.9159	116.993
2020-07-29	B	352.383	60.1178	119.59
2020-07-30	B	366.042	62.6835	124.306
2020-07-31	B	373.084	63.6569	126.612
2020-08-01	B	384.12	65.5274	130.286
2020-08-02	B	380.245	64.5957	129.609
2020-08-03	B	382.258	64.7345	130.446
2020-08-04	B	390.316	66.0039	132.982
2020-08-05	B	402.89	68.1322	136.873
2020-08-06	B	408.334	69.2041	139.182
2020-08-07	B	418.668	70.9488	142.532
2020-08-08	B	434.525	73.6591	147.426
2020-08-09	B	441.783	74.9164	150.145
2020-08-10	B	443.671	75.1599	151.267
2020-08-11	B	454.956	76.7107	154.354
2020-08-12	B	466.962	79.0264	158.655
2020-08-13	B	470.254	79.4447	160.057
2020-08-14	B	470.074	79.3051	160.52
2020-08-15	B	471.921	79.5826	161.541
2020-08-16	B	471.837	79.2814	161.602
2020-08-17	B	464.765	77.4912	159.251
2020-08-18	B	464.703	77.5136	159.56
2020-08-19	B	457.317	76.3009	157.906
2020-08-20	B	459.653	76.7325	158.712
2020-08-21	B	455.655	76.1492	157.944
2020-08-22	B	449.228	74.8949	156.072
2020-08-23	B	440.719	73.148	153.337
2020-08-24	B	430.426	71.3955	150.481
2020-08-25	B	427.603	71.1609	149.896
2020-08-26	B	416.85	68.9491	146.235
2020-08-27	B	421.967	69.9598	147.49
2020-08-28	B	414.686	68.7608	145.399
2020-08-29	B	419.112	69.6088	146.456
2020-08-30	B	404.239	66.9652	142.145
2020-08-31	B	399.49	66.2986	140.775
2020-09-01	B	390.42	64.3897	137.46
2020-09-02	B	378.313	62.2	133.625
2020-09-03	B	371.601	61.2183	131.586
2020-09-04	B	359.182	58.9913	127.6
2020-09-05	B	343.87	56.0678	122.444
2020-09-06	B	333.079	54.3942	119.125
2020-09-07	B	327.163	53.4128	116.866
2020-09-08	B	316.759	51.7324	113.542
2020-09-09	B	304.508	49.5861	109.467
2020-09-10	B	294.673	47.7586	105.842
2020-09-11	B	286.91	46.6629	103.336
2020-09-12	B	277.257	45.0758	100.091
2020-09-13	B	272.315	44.4244	98.3005
2020-09-14	B	263.08	42.8554	95.1303
2020-09-15	B	267.163	43.8387	95.9357
2020-09-16	B	256.997	42.2453	92.8704
2020-09-17	B	247.95	40.5098	89.5513
2020-09-18	B	245.529	40.2256	88.4627
2020-09-19	B	234.453	38.2416	84.7802
2020-09-20	B	224.626	36.5466	81.493
2020-09-21	B	218.204	35.4503	79.1107
2020-09-22	B	210.365	33.8461	75.9472
2020-09-23	B	200.313	32.3096	72.8671
2020-09-24	B	190.03	30.4718	69.3011
2020-09-25	B	183.883	29.6363	67.2684
2020-09-26	B	182.614	29.6945	66.6685
2020-09-27	B	175.526	28.4007	64.0463
2020-09-28	B	172.451	28.1101	62.9825
2020-09-29	B	163.482	26.3953	59.7507
2020-09-30	B	157.794	25.6208	57.9455
2020-02-18	C	0	0	0
2020-02-19	C	0	0	0
2020-02-20	C	0	0	0
2020-02-21	C	0	0	0
2020-02-22	C	0.333333	0.0637867	0.0996667
2020-02-23	C	0.619048	0.116942	0.186875
2020-02-24	C	0.863946	0.172332	0.280516
2020-02-25	C	1.07386	0.21849	0.362451
2020-02-26	C	0.92045	0.182075	0.317145
2020-02-27	C	1.78896	0.354182	0.593835
2020-02-28	C	2.53339	0.497605	0.835939
2020-02-29	C	2.83815	0.542244	0.93078
2020-03-01	C	5.09936	0.94275	1.58143
2020-03-02	C	5.37088	0.988079	1.70009
2020-03-03	C	5.27028	0.950972	1.68691
2020-03-04	C	6.18405	1.1225	1.99171
2020-03-05	C	6.30061	1.12678	2.04175
2020-03-06	C	7.40053	1.3328	2.40186
2020-03-07	C	8.34331	1.49338	2.69963
2020-03-08	C	7.81807	1.39425	2.59618
2020-03-09	C	7.70121	1.35323	2.57065
2020-03-10	C	9.2677	1.64908	3.06399
2020-03-11	C	13.2771	2.32271	4.16299
2020-03-12	C	16.3804	2.87298	5.10728
2020-03-13	C	20.0403	3.5229	6.23254
2020-03-14	C	21.5107	3.78716	6.78381
2020-03-15	C	22.7711	3.95469	7.18383
2020-03-16	C	25.1848	4.36053	7.94985
2020-03-17	C	26.5869	4.44359	8.22145
2020-03-18	C	27.1221	4.41574	8.30744
2020-03-19	C	29.5809	4.95829	9.26668
2020-03-20	C	32.355	5.42983	10.1363
2020-03-21	C	34.3996	5.86715	10.9666
2020-03-22	C	37.152	6.251	11.7235
2020-03-23	C	42.1779	7.14773	13.287
2020-03-24	C	42.8192	7.24326	13.6368
2020-03-25	C	48.0355	8.24085	15.3772
2020-03-26	C	53.1733	9.0389	16.8481
2020-03-27	C	53.2437	9.06607	17.1384
2020-03-28	C	57.9708	10.0039	18.8224
2020-03-29	C	58.356	10.0089	19.0826
2020-03-30	C	63.0194	10.9727	20.8096
2020-03-31	C	67.6833	11.8396	22.4204
2020-04-01	C	71.6809	12.5925	23.8775
2020-04-02	C	73.1074	12.7817	24.4678
2020-04-03	C	74.6635	13.0476	25.1534
2020-04-04	C	73.3306	12.7256	24.9039
2020-04-05	C	77.5215	13.5666	26.4189
2020-04-06	C	77.447	13.3383	26.2929
2020-04-07	C	82.7165	14.288	27.9636
2020-04-08	C	84.2332	14.558	28.6108
2020-04-09	C	80.8665	13.8345	27.6951
2020-04-10	C	78.3142	13.1899	26.8289
2020-04-11	C	79.1264	13.2824	27.0546
2020-04-12	C	78.156	13.0599	26.7841
2020-04-13	C	78.9908	13.1075	26.9114
2020-04-14	C	76.0398	12.5314	26.0608
2020-04-15	C	74.1769	12.179	25.5159
2020-04-16	C	73.9136	12.1515	25.4551
2020-04-17	C	71.0212	11.6183	24.6045
2020-04-18	C	68.2086	11.1629	23.843
2020-04-19	C	68.7979	11.3491	24.0606
2020-04-20	C	70.3029	11.704	24.563
2020-04-21	C	71.2597	11.9248	24.8856
2020-04-22	C	67.7464	11.1937	23.7379
2020-04-23	C	66.0683	10.8617	23.167
2020-04-24	C	65.63	10.8097	23.0185
2020-04-25	C	65.9209	10.7775	22.9058
2020-04-26	C	68.1703	11.2166	23.5353
2020-04-27	C	67.4317	11.1248	23.371
2020-04-28	C	66.7986	10.9846	23.1277
2020-04-29	C	63.2559	10.1966	21.866
2020-04-30	C	61.5527	10.0003	21.4814
2020-05-01	C	61.7595	10.1446	21.6259
2020-05-02	C	61.9367	10.1677	21.6007
2020-05-03	C	59.7553	9.77382	20.9329
2020-05-04	C	61.2188	10.0723	21.328
2020-05-05	C	56.4733	9.18122	19.8927
2020-05-06	C	56.739	9.20409	19.8327
2020-05-07	C	56.3001	9.20372	19.75
2020-05-08	C	55.9239	9.03425	19.4132
2020-05-09	C	54.6014	8.87084	19.0839
2020-05-10	C	54.8012	9.0009	19.2118
2020-05-11	C	53.9725	8.89573	18.99
2020-05-12	C	55.9288	9.31839	19.5932
2020-05-13	C	54.939	9.14922	19.3064
2020-05-14	C	53.7572	8.81688	18.7564
2020-05-15	C	50.4109	8.16831	17.6945
2020-05-16	C	47.876	7.73322	16.9301
2020-05-17	C	46.3699	7.42333	16.3435
2020-05-18	C	47.7457	7.61161	16.5279
2020-05-19	C	46.2582	7.2166	15.8269
2020-05-20	C	44.9832	7.0788	15.5125
2020-05-21	C	41.8904	6.55905	14.6048
2020-05-22	C	40.906	6.35889	14.1745
2020-05-23	C	39.3956	6.09779	13.6507
2020-05-24	C	39.101	6.14645	13.6084
2020-05-25	C	38.8485	6.16482	13.5367
2020-05-26	C	39.9654	6.45746	13.9072
2020-05-27	C	44.9227	7.35028	15.2455
2020-05-28	C	44.8385	7.38155	15.3028
2020-05-29	C	44.433	7.34383	15.2533
2020-05-30	C	44.4188	7.37618	15.3096
2020-05-31	C	44.0732	7.21177	15.0599
2020-06-01	C	42.1104	6.80853	14.4254
2020-06-02	C	42.7613	6.84412	14.4509
2020-06-03	C	42.3192	6.83218	14.4082
2020-06-04	C	45.6069	7.47119	15.3849
2020-06-05	C	45.7583	7.51559	15.4768
2020-06-06	C	50.2214	8.44561	16.9525
2020-06-07	C	55.3803	9.42307	18.5601
2020-06-08	C	57.4688	9.79112	19.2691
2020-06-09	C	59.9256	10.1172	19.9198
2020-06-10	C	63.0315	10.6442	20.8878
2020-06-11	C	64.027	10.8392	21.3535
2020-06-12	C	69.8803	11.9391	23.2256
2020-06-13	C	68.5641	11.6299	22.9484
2020-06-14	C	68.7692	11.6828	23.1912
2020-06-15	C	70.945	12.0875	23.967
2020-06-16	C	77.1434	13.2983	26.0108
2020-06-17	C	76.7895	13.0732	25.8708
2020-06-18	C	81.1529	13.9394	27.3949
2020-06-19	C	85.2263	14.5864	28.6116
2020-06-20	C	89.7178	15.3807	30.0748
2020-06-21	C	93.5676	16.0344	31.3421
2020-06-22	C	97.5342	16.5873	32.464
2020-06-23	C	106.601	18.3045	35.4087
2020-06-24	C	112.039	19.2473	37.2226
2020-06-25	C	113.7	19.5311	38.0254
2020-06-26	C	121.457	20.7992	40.3399
2020-06-27	C	128.106	22.0501	42.6684
2020-06-28	C	136.138	23.3588	45.1219
2020-06-29	C	145.357	24.9236	48.0096
2020-06-30	C	149.592	25.6452	49.6264
2020-07-01	C	159.888	27.5139	53.0215
2020-07-02	C	172.047	29.8921	57.2748
2020-07-03	C	179.802	31.2333	59.9954
2020-07-04	C	190.449	32.9999	63.39
2020-07-05	C	199.576	34.3972	66.2433
2020-07-06	C	212.398	36.6487	70.4385
2020-07-07	C	220.389	37.9926	73.2774
2020-07-08	C	228.905	39.1956	75.8914
2020-07-09	C	236.871	40.4561	78.5816
2020-07-10	C	252.699	43.2842	83.7132
2020-07-11	C	261.599	44.6592	86.6694
2020-07-12	C	285.561	49.2439	94.6294
2020-07-13	C	294.1	50.746	97.9717
2020-07-14	C	303.086	52.1781	101.178
2020-07-15	C	313.788	53.7874	104.633
2020-07-16	C	325.961	55.9911	109.005
2020-07-17	C	340.062	58.3738	113.683
2020-07-18	C	357.148	61.2579	119.181
2020-07-19	C	380.127	65.4419	126.773
2020-07-20	C	390.823	67.2257	130.756
2020-07-21	C	399.325	68.5846	134.041
2020-07-22	C	416.278	71.4115	139.564
2020-07-23	C	433.143	73.9809	144.73
2020-07-24	C	443.932	75.7448	148.66
2020-07-25	C	460.18	78.5182	154.137
2020-07-26	C	480.773	82.2798	161.194
2020-07-27	C	489.425	83.3678	164.172
2020-07-28	C	503.507	85.6168	168.875
2020-07-29	C	516.911	87.2385	172.596
2020-07-30	C	535.4	90.8669	179.409
2020-07-31	C	542.914	91.8382	182.164
2020-08-01	C	555.355	93.9317	186.581
2020-08-02	C	571.018	96.5139	191.754
2020-08-03	C	579.111	97.817	194.955
2020-08-04	C	586.714	98.8669	197.699
2020-08-05	C	602.898	101.392	202.679
2020-08-06	C	605.103	101.702	204.232
2020-08-07	C	618.993	104.356	209.336
2020-08-08	C	629.565	105.67	212.397
2020-08-09	C	652.628	109.998	220.128
2020-08-10	C	670.395	112.77	225.589
2020-08-11	C	672.624	112.803	226.809
2020-08-12	C	673.868	112.642	227.582
2020-08-13	C	682.935	114.355	231.145
2020-08-14	C	672.706	112.108	228.521
2020-08-15	C	670.605	111.858	228.759
2020-08-16	C	669.138	111.605	228.899
2020-08-17	C	673.213	112.334	230.49
2020-08-18	C	671.707	112.085	230.543
2020-08-19	C	673.749	112.249	231.17
2020-08-20	C	669.165	111.418	230.206
2020-08-21	C	655.904	108.956	226.599
2020-08-22	C	650.203	108.21	225.483
2020-08-23	C	643.317	106.904	223.436
2020-08-24	C	631.415	104.423	219.47
2020-08-25	C	615.546	101.327	214.392
2020-08-26	C	609.944	100.239	212.28
2020-08-27	C	608.476	99.9753	211.437
2020-08-28	C	600.884	98.7519	209.131
2020-08-29	C	587.043	96.1294	204.609
2020-08-30	C	574.847	93.9939	200.73
2020-08-31	C	561.392	91.5765	196.339
2020-09-01	C	543.194	88.472	190.794
2020-09-02	C	525.594	85.5716	185.452
2020-09-03	C	512.843	83.3959	181.155
2020-09-04	C	500.58	81.2083	176.811
2020-09-05	C	488.735	79.3549	172.961
2020-09-06	C	476.916	77.7521	169.502
2020-09-07	C	463.118	74.8135	163.971
2020-09-08	C	451.292	72.9526	160.049
2020-09-09	C	440.821	71.3047	156.467
2020-09-10	C	426.847	68.825	151.603
2020-09-11	C	418.869	67.6404	148.725
2020-09-12	C	407.364	65.7908	144.859
2020-09-13	C	391.836	63.1235	139.717
2020-09-14	C	379.859	61.2862	135.82
2020-09-15	C	364.594	58.5127	130.469
2020-09-16	C	350.509	56.0739	125.587
2020-09-17	C	341.436	54.4769	121.996
2020-09-18	C	327.659	52.1255	117.259
2020-09-19	C	315.184	50.0302	112.902
2020-09-20	C	300.825	47.7765	108.297
2020-09-21	C	290.85	46.1758	104.7
2020-09-22	C	284.966	45.5546	102.667
2020-09-23	C	275.257	43.947	99.185
2020-09-24	C	266.934	42.6711	96.2379
2020-09-25	C	258.468	41.4388	93.3948
2020-09-26	C	247.21	39.4411	89.3905
2020-09-27	C	239.228	38.1397	86.4543
2020-09-28	C	233.719	37.3353	84.3229
2020-09-29	C	222.997	35.5972	80.7895
2020-09-30	C	213.807	34.257	77.8668
2020-02-18	D	0	0	0
2020-02-19	D	0	0	0
2020-02-20	D	0.666667	0.127573	0.199333
2020-02-21	D	0.904762	0.170098	0.274083
2020-02-22	D	2.10884	0.396895	0.63849
2020-02-23	D	3.14091	0.608079	0.992012
2020-02-24	D	6.02555	1.18897	1.93401
2020-02-25	D	7.16475	1.38462	2.30759
2020-02-26	D	8.14122	1.49497	2.55214
2020-02-27	D	12.6449	2.29968	3.87979
2020-02-28	D	15.1718	2.7373	4.67748
2020-02-29	D	18.0044	3.27117	5.6398
2020-03-01	D	20.7657	3.79093	6.59882
2020-03-02	D	25.1325	4.66226	8.12264
2020-03-03	D	28.2088	5.14153	9.07031
2020-03-04	D	35.179	6.50051	11.3989
2020-03-05	D	39.8201	7.11991	12.6347
2020-03-06	D	51.1315	9.20025	16.16
2020-03-07	D	60.1603	10.6482	18.7983
2020-03-08	D	70.8993	12.501	22.1165
2020-03-09	D	81.1042	14.3251	25.4576
2020-03-10	D	93.5179	16.472	29.3604
2020-03-11	D	101.492	17.6648	31.8437
2020-03-12	D	112.993	19.4575	35.2646
2020-03-13	D	130.518	22.3326	40.4158
2020-03-14	D	140.539	24.135	43.9959
2020-03-15	D	154.795	26.6492	48.71
2020-03-16	D	170.015	29.1882	53.5283
2020-03-17	D	182.06	31.2013	57.5839
2020-03-18	D	204.052	35.2252	64.7986
2020-03-19	D	221.235	38.1347	70.4181
2020-03-20	D	234.63	40.3042	74.9365
2020-03-21	D	254.445	43.4405	80.9658
2020-03-22	D	278.429	47.9676	89.2314
2020-03-23	D	296.987	51.0969	95.4585
2020-03-24	D	311.56	53.3052	100.283
2020-03-25	D	327.051	55.714	105.393
2020-03-26	D	344.996	58.839	111.611
2020-03-27	D	368.378	62.9879	119.465
2020-03-28	D	392.419	67.3578	127.763
2020-03-29	D	416.026	71.5734	135.92
2020-03-30	D	436.927	75.0448	142.993
2020-03-31	D	466.509	79.732	151.986
2020-04-01	D	488.531	83.5021	159.642
2020-04-02	D	508.741	86.8186	166.614
2020-04-03	D	518.731	88.0154	170.266
2020-04-04	D	550.293	93.6081	180.642
2020-04-05	D	566.346	95.6369	185.609
2020-04-06	D	586.106	99.2383	192.941
2020-04-07	D	608.044	103.074	200.66
2020-04-08	D	615.847	104.116	204.047
2020-04-09	D	618.869	104.094	205.621
2020-04-10	D	620.792	104.064	206.98
2020-04-11	D	616.774	102.725	206.115
2020-04-12	D	623.664	103.695	208.617
2020-04-13	D	609.902	100.839	205.082
2020-04-14	D	605.107	99.9211	204.272
2020-04-15	D	600.996	98.7705	202.961
2020-04-16	D	590.14	96.5332	199.817
2020-04-17	D	568.167	92.1007	193.053
2020-04-18	D	558.667	90.3177	190.12
2020-04-19	D	551.858	89.2451	188.199
2020-04-20	D	536.354	86.4599	183.563
2020-04-21	D	531.065	85.7446	182.016
2020-04-22	D	523.866	84.5995	179.804
2020-04-23	D	515.361	83.4233	177.522
2020-04-24	D	511.071	82.604	175.776
2020-04-25	D	493.394	79.6249	170.661
2020-04-26	D	488.576	78.823	168.811
2020-04-27	D	477.446	76.9622	165.329
2020-04-28	D	470.906	75.7194	162.763
2020-04-29	D	468.967	75.4408	161.701
2020-04-30	D	450.639	72.366	156.33
2020-05-01	D	444.595	71.2819	153.94
2020-05-02	D	434.081	69.4854	150.454
2020-05-03	D	421.403	67.209	146.185
2020-05-04	D	410.203	65.459	142.68
2020-05-05	D	398.602	63.4405	138.738
2020-05-06	D	393.659	62.7346	136.814
2020-05-07	D	387.422	61.6666	134.38
2020-05-08	D	382.076	60.5547	131.904
2020-05-09	D	375.827	59.703	129.855
2020-05-10	D	370.471	59.0265	128.114
2020-05-11	D	360.213	57.3756	124.892
2020-05-12	D	353.087	56.3521	122.622
2020-05-13	D	347.313	55.2773	120.29
2020-05-14	D	345.364	55.1138	119.394
2020-05-15	D	344.693	55.1079	118.813
2020-05-16	D	332.451	53.0785	115.141
2020-05-17	D	329.291	52.4189	113.541
2020-05-18	D	323.25	51.7112	111.893
2020-05-19	D	320.738	51.4321	110.937
2020-05-20	D	314.918	50.3231	108.731
2020-05-21	D	308.93	49.5931	107.104
2020-05-22	D	306.464	49.0347	105.758
2020-05-23	D	300.683	48.0369	103.749
2020-05-24	D	302.728	48.7806	104.452
2020-05-25	D	301.148	48.5794	103.784
2020-05-26	D	300.794	48.8195	103.837
2020-05-27	D	296.49	47.9213	102.168
2020-05-28	D	293.134	47.4197	101.092
2020-05-29	D	297.258	48.3495	102.257
2020-05-30	D	299.792	48.858	102.861
2020-05-31	D	309.298	50.4855	105.27
2020-06-01	D	317.113	52.0441	107.694
2020-06-02	D	325.478	53.5566	110.148
2020-06-03	D	338.981	56.0705	114.255
2020-06-04	D	347.222	57.4637	116.752
2020-06-05	D	352.952	58.3364	118.486
2020-06-06	D	368.864	61.5152	123.834
2020-06-07	D	383.835	63.9118	128.119
2020-06-08	D	401.002	67.182	133.857
2020-06-09	D	412.716	69.4052	138.094
2020-06-10	D	427.09	72.026	143.002
2020-06-11	D	443.077	74.4291	147.638
2020-06-12	D	465.114	78.2316	154.507
2020-06-13	D	483.335	81.4448	160.587
2020-06-14	D	503.621	85.2927	167.736
2020-06-15	D	513.008	86.6717	171.135
2020-06-16	D	541.055	91.5815	179.986
2020-06-17	D	568.095	96.175	188.514
2020-06-18	D	595.938	101.035	197.588
2020-06-19	D	635.804	108.099	210.239
2020-06-20	D	677.308	115.464	223.618
2020-06-21	D	705.883	120.154	233.062
2020-06-22	D	735.71	124.844	242.548
2020-06-23	D	771.941	130.96	254.298
2020-06-24	D	821.331	139.796	270.42
2020-06-25	D	867.998	147.674	285.333
2020-06-26	D	914.665	155.782	300.791
2020-06-27	D	961.332	163.747	316.206
2020-06-28	D	1016.33	173.311	334.266
2020-06-29	D	1056.81	179.819	347.785
2020-06-30	D	1108.5	188.359	364.484
2020-07-01	D	1174.14	199.454	385.31
2020-07-02	D	1232.08	209.75	405.176
2020-07-03	D	1278.07	217.512	421.279
2020-07-04	D	1341.48	228.265	442.065
2020-07-05	D	1402.18	238.363	462.029
2020-07-06	D	1473.2	250.955	486.024
2020-07-07	D	1529.74	260.491	505.524
2020-07-08	D	1621.54	276.994	535.955
2020-07-09	D	1696.56	289.176	560.13
2020-07-10	D	1763.19	300.316	582.825
2020-07-11	D	1862.64	317.065	614.349
2020-07-12	D	1942.88	330.6	641.274
2020-07-13	D	2029.66	345.089	669.847
2020-07-14	D	2099.38	356	693.032
2020-07-15	D	2169.47	366.907	716.153
2020-07-16	D	2226.88	375.855	736.164
2020-07-17	D	2320.75	391.853	767.019
2020-07-18	D	2416.21	408.507	799.209
2020-07-19	D	2513.71	425.026	831.501
2020-07-20	D	2606.94	441.016	863.231
2020-07-21	D	2705.52	457.669	896.195
2020-07-22	D	2799.35	473.535	928.146
2020-07-23	D	2908.11	492.014	964.319
2020-07-24	D	2994	507.331	995.84
2020-07-25	D	3073.28	519.687	1022.78
2020-07-26	D	3158.58	534.238	1053.01
2020-07-27	D	3240.35	547.121	1080.64
2020-07-28	D	3333.11	561.867	1111.08
2020-07-29	D	3420.29	576.056	1140.68
2020-07-30	D	3495.34	588.633	1167.76
2020-07-31	D	3585.67	603.78	1198.75
2020-08-01	D	3673.43	618.662	1229.39
2020-08-02	D	3718.66	624.252	1245.56
2020-08-03	D	3788.75	635.295	1269.69
2020-08-04	D	3839.5	643.233	1288.82
2020-08-05	D	3890	651.476	1308.11
2020-08-06	D	3913.62	654.429	1318.86
2020-08-07	D	3935.53	656.629	1327.87
2020-08-08	D	3970.65	662.093	1341.42
2020-08-09	D	3992.41	664.236	1349.51
2020-08-10	D	4011.4	666.735	1357.7
2020-08-11	D	4031.34	669.508	1365.95
2020-08-12	D	4034.77	669.591	1369.69
2020-08-13	D	4000.71	661.438	1360.11
2020-08-14	D	4006.85	660.576	1361
2020-08-15	D	4014.11	662.473	1365.86
2020-08-16	D	3997.33	658.734	1361.81
2020-08-17	D	3976.61	654.343	1356.27
2020-08-18	D	3943.19	647.988	1347.2
2020-08-19	D	3912.55	642.098	1338.35
2020-08-20	D	3874.94	634.797	1326.86
2020-08-21	D	3826.05	625.804	1312.26
2020-08-22	D	3755.47	613.475	1291.94
2020-08-23	D	3704.31	603.598	1274.77
2020-08-24	D	3668.79	598.19	1264.16
2020-08-25	D	3588.01	584.06	1239.84
2020-08-26	D	3533.44	574.973	1222.76
2020-08-27	D	3459.33	562.202	1199.69
2020-08-28	D	3385.14	549.22	1175.85
2020-08-29	D	3302.21	534.18	1148.4
2020-08-30	D	3232.47	521.478	1124.11
2020-08-31	D	3148.02	507.32	1097.28
2020-09-01	D	3079.97	495.953	1074.47
2020-09-02	D	2981.97	478.85	1042.59
2020-09-03	D	2899.31	464.523	1014.58
2020-09-04	D	2814.46	450.065	986.14
2020-09-05	D	2748.73	439.515	963.592
2020-09-06	D	2666.38	425.983	936.457
2020-09-07	D	2565.8	408.975	903.757
2020-09-08	D	2465.59	391.753	870.382
2020-09-09	D	2378.03	377.135	840.763
2020-09-10	D	2303.31	365.48	815.67
2020-09-11	D	2222.6	352.945	789.302
2020-09-12	D	2131.09	337.562	758.516
2020-09-13	D	2055.65	325.692	733.061
2020-09-14	D	1997.65	316.205	711.42
2020-09-15	D	1910.6	301.929	682.531
2020-09-16	D	1844.66	291.374	659.35
2020-09-17	D	1757.8	276.117	628.971
2020-09-18	D	1684.69	264.237	603.693
2020-09-19	D	1627.02	255.197	582.918
2020-09-20	D	1563.26	244.815	560.289
2020-09-21	D	1498.93	234.45	537.812
2020-09-22	D	1443.47	225.876	518.243
2020-09-23	D	1387.92	217.236	498.785
2020-09-24	D	1330.32	208.001	478.579
2020-09-25	D	1271.6	198.768	458.497
2020-09-26	D	1207.28	188.354	436.675
2020-09-27	D	1156.81	180.568	418.976
2020-09-28	D	1103.89	172.355	400.794
2020-09-29	D	1056.85	165.245	384.469
2020-09-30	D	1005.21	156.579	365.903
2020-02-18	E	0	0	0
2020-02-19	E	0	0	0
2020-02-20	E	0	0	0
2020-02-21	E	0	0	0
2020-02-22	E	0	0	0
2020-02-23	E	0.333333	0.0637867	0.0996667
2020-02-24	E	0.285714	0.0531556	0.0872083
2020-02-25	E	0.911565	0.182963	0.292974
2020-02-26	E	1.78134	0.343829	0.555352
2020-02-27	E	2.19353	0.425191	0.7026
2020-02-28	E	2.54684	0.481899	0.814108
2020-02-29	E	2.84967	0.529156	0.911678
2020-03-01	E	3.44257	0.632323	1.09672
2020-03-02	E	4.61744	0.845869	1.45796
2020-03-03	E	5.29114	0.971131	1.69172
2020-03-04	E	5.53526	1.01173	1.79659
2020-03-05	E	6.07785	1.13153	2.02268
2020-03-06	E	6.87625	1.28407	2.30284
2020-03-07	E	8.22726	1.54984	2.76466
2020-03-08	E	11.0519	2.09025	3.66707
2020-03-09	E	12.8064	2.39084	4.22269
2020-03-10	E	13.6436	2.44997	4.40985
2020-03-11	E	14.0278	2.43545	4.47395
2020-03-12	E	15.0239	2.61472	4.82904
2020-03-13	E	16.8776	3.01093	5.52541
2020-03-14	E	17.4665	3.10538	5.7664
2020-03-15	E	21.3046	3.65277	6.7096
2020-03-16	E	23.2611	3.98136	7.33557
2020-03-17	E	27.2714	4.76548	8.68062
2020-03-18	E	29.7088	5.20537	9.52388
2020-03-19	E	35.1314	6.20149	11.2454
2020-03-20	E	41.1126	7.22295	13.0507
2020-03-21	E	42.2394	7.38083	13.547
2020-03-22	E	44.2052	7.75922	14.367
2020-03-23	E	44.2235	7.75562	14.5861
2020-03-24	E	49.9059	8.80371	16.4202
2020-03-25	E	51.4431	9.07253	17.0803
2020-03-26	E	54.0941	9.45463	17.905
2020-03-27	E	56.3664	9.84792	18.7435
2020-03-28	E	59.6474	10.4003	19.8282
2020-03-29	E	61.793	10.7858	20.6604
2020-03-30	E	65.2987	11.2872	21.6702
2020-03-31	E	71.9704	12.4706	23.7497
2020-04-01	E	76.3555	13.1266	25.0537
2020-04-02	E	77.7809	13.3766	25.731
2020-04-03	E	82.336	14.2783	27.4069
2020-04-04	E	86.2404	15.0075	28.8387
2020-04-05	E	86.2537	14.8802	28.9432
2020-04-06	E	84.9317	14.5384	28.6663
2020-04-07	E	86.4653	14.8193	29.308
2020-04-08	E	87.4464	14.8094	29.4882
2020-04-09	E	90.2874	15.4307	30.6295
2020-04-10	E	85.3892	14.4563	29.2968
2020-04-11	E	84.5241	14.2933	29.1447
2020-04-12	E	83.1159	13.9994	28.7646
2020-04-13	E	81.2422	13.5299	28.081
2020-04-14	E	79.6362	13.2551	27.6649
2020-04-15	E	78.9262	13.1009	27.4178
2020-04-16	E	76.3177	12.4178	26.3349
2020-04-17	E	76.7485	12.4781	26.371
2020-04-18	E	77.1178	12.6337	26.5673
2020-04-19	E	75.101	12.2975	26.0111
2020-04-20	E	73.0389	11.9868	25.4767
2020-04-21	E	68.9381	11.2342	24.2378
2020-04-22	E	65.0898	10.5544	23.0714
2020-04-23	E	69.4579	11.4799	24.3821
2020-04-24	E	69.5354	11.4746	24.3157
2020-04-25	E	66.6018	10.8185	23.2392
2020-04-26	E	66.4205	10.8264	23.164
2020-04-27	E	67.9319	11.1935	23.6615
2020-04-28	E	65.894	10.82	23.0351
2020-04-29	E	62.1472	10.0511	21.7721
2020-04-30	E	60.2691	9.8042	21.2822
2020-05-01	E	57.9925	9.39598	20.5373
2020-05-02	E	56.7079	9.10849	19.9678
2020-05-03	E	54.6068	8.77185	19.3178
2020-05-04	E	52.8058	8.49131	18.7491
2020-05-05	E	50.5954	8.08836	17.9871
2020-05-06	E	51.3675	8.30723	18.1871
2020-05-07	E	48.696	7.87118	17.3957
2020-05-08	E	47.4061	7.69915	17.0022
2020-05-09	E	45.9671	7.40604	16.4239
2020-05-10	E	43.4004	6.89554	15.502
2020-05-11	E	43.2003	6.78906	15.1935
2020-05-12	E	44.3622	7.13851	15.6083
2020-05-13	E	43.6914	7.00262	15.304
2020-05-14	E	44.7831	7.23051	15.5706
2020-05-15	E	42.3855	6.81305	14.855
2020-05-16	E	41.6638	6.7425	14.6621
2020-05-17	E	41.3785	6.7475	14.593
2020-05-18	E	43.4673	7.15657	15.1652
2020-05-19	E	42.591	7.06205	14.9856
2020-05-20	E	41.1732	6.81133	14.5597
2020-05-21	E	39.958	6.5719	14.1394
2020-05-22	E	37.9164	6.16991	13.4553
2020-05-23	E	40.4998	6.73903	14.2694
2020-05-24	E	40.7141	6.7668	14.2841
2020-05-25	E	40.8978	6.83153	14.3619
2020-05-26	E	40.7219	6.82169	14.3303
2020-05-27	E	41.9045	7.05754	14.684
2020-05-28	E	40.2515	6.7327	14.1789
2020-05-29	E	40.5013	6.84749	14.3392
2020-05-30	E	45.0487	7.75019	15.7404
2020-05-31	E	41.9465	7.11854	14.8042
2020-06-01	E	42.9541	7.31601	15.116
2020-06-02	E	45.1512	7.73572	15.7875
2020-06-03	E	46.0343	7.8636	16.0284
2020-06-04	E	45.458	7.74554	15.8882
2020-06-05	E	47.6307	8.1824	16.6018
2020-06-06	E	48.1596	8.25525	16.7713
2020-06-07	E	51.613	8.93442	17.8859
2020-06-08	E	53.5731	9.32012	18.5795
2020-06-09	E	53.5864	9.18117	18.467
2020-06-10	E	59.5979	10.2163	20.167
2020-06-11	E	60.0839	10.258	20.3718
2020-06-12	E	58.5005	9.95443	20.0223
2020-06-13	E	59.1433	10.0204	20.2149
2020-06-14	E	62.0276	10.4885	21.029
2020-06-15	E	65.1665	11.0617	22.0274
2020-06-16	E	65.5237	11.1345	22.2683
2020-06-17	E	67.8298	11.4835	22.9297
2020-06-18	E	67.4732	11.4555	23.0102
2020-06-19	E	70.8341	11.9729	23.9256
2020-06-20	E	78.3816	13.4274	26.3256
2020-06-21	E	85.8509	15.0167	29.0149
2020-06-22	E	91.5865	15.8364	30.5793
2020-06-23	E	93.8361	16.2754	31.5669
2020-06-24	E	97.0976	16.852	32.7604
2020-06-25	E	103.893	18.1201	35.0353
2020-06-26	E	107.385	18.7221	36.3153
2020-06-27	E	115.711	20.114	38.8262
2020-06-28	E	119.514	20.7857	40.2606
2020-06-29	E	126.44	21.8032	42.2307
2020-06-30	E	130.711	22.6649	43.9762
2020-07-01	E	136.038	23.6048	45.8501
2020-07-02	E	143.604	24.9622	48.3869
2020-07-03	E	154.089	27.0113	52.0409
2020-07-04	E	160.41	27.8537	53.8861
2020-07-05	E	172.494	29.9062	57.611
2020-07-06	E	181.852	31.5751	60.8053
2020-07-07	E	195.873	34.125	65.4116
2020-07-08	E	199.225	34.4862	66.6862
2020-07-09	E	218.764	37.8932	72.6547
2020-07-10	E	228.512	39.5815	76.0789
2020-07-11	E	241.534	41.7872	80.323
2020-07-12	E	253.029	43.7972	84.3053
2020-07-13	E	265.882	45.927	88.5005
2020-07-14	E	272.899	46.8393	90.8236
2020-07-15	E	293.913	50.7972	97.8526
2020-07-16	E	303.592	52.5618	101.607
2020-07-17	E	311.555	53.4666	104.008
2020-07-18	E	330.381	56.675	109.943
2020-07-19	E	332.517	56.6307	110.89
2020-07-20	E	346.015	59.0206	115.511
2020-07-21	E	359.251	61.4918	120.303
2020-07-22	E	373.262	63.8896	125.025
2020-07-23	E	387.606	66.4757	130.076
2020-07-24	E	392.9	66.9473	131.865
2020-07-25	E	408.772	69.0987	136.177
2020-07-26	E	418.042	70.6668	139.6
2020-07-27	E	423.322	71.4966	141.849
2020-07-28	E	432.514	73.253	145.481
2020-07-29	E	447.393	75.7539	150.28
2020-07-30	E	463.813	78.6922	155.814
2020-07-31	E	475.221	80.7803	160.092
2020-08-01	E	476.665	80.7648	161.093
2020-08-02	E	486.904	82.3382	164.448
2020-08-03	E	512.013	86.9608	172.557
2020-08-04	E	525.201	89.2959	177.282
2020-08-05	E	531.506	90.31	179.96
2020-08-06	E	536.576	90.6365	181.493
2020-08-07	E	545.256	92.1732	184.811
2020-08-08	E	553.696	93.6923	188.087
2020-08-09	E	575.263	97.6705	195.191
2020-08-10	E	581.083	98.4869	197.503
2020-08-11	E	583.071	98.4545	198.412
2020-08-12	E	585.108	98.6521	199.558
2020-08-13	E	587.521	98.8168	200.562
2020-08-14	E	582.923	97.7976	199.632
2020-08-15	E	576.982	96.6543	198.36
2020-08-16	E	571.222	95.1385	196.367
2020-08-17	E	571.953	95.3591	196.941
2020-08-18	E	558.912	92.6808	192.972
2020-08-19	E	554.734	91.6387	191.358
2020-08-20	E	552.153	91.4609	191.025
2020-08-21	E	561.94	93.2373	193.74
2020-08-22	E	559.997	92.9456	193.347
2020-08-23	E	561.997	93.4041	194.1
2020-08-24	E	563.378	93.6614	194.563
2020-08-25	E	554.896	91.9372	191.94
2020-08-26	E	562.958	93.479	194.298
2020-08-27	E	550.869	91.3027	190.954
2020-08-28	E	544.507	90.2823	189.267
2020-08-29	E	540.387	89.1213	187.306
2020-08-30	E	535.189	88.2925	185.806
2020-08-31	E	525.4	86.5951	182.921
2020-09-01	E	518.343	85.2472	180.501
2020-09-02	E	513.627	84.6342	179.18
2020-09-03	E	495.918	81.6274	174.125
2020-09-04	E	488.74	80.5389	171.915
2020-09-05	E	471.586	77.5989	166.806
2020-09-06	E	465.884	76.6993	164.758
2020-09-07	E	455.995	75.1092	161.652
2020-09-08	E	442.52	72.3948	156.764
2020-09-09	E	426.636	69.3284	151.23
2020-09-10	E	413.688	67.2058	147.064
2020-09-11	E	395.59	63.9893	141.157
2020-09-12	E	383.744	61.9605	137.006
2020-09-13	E	373.923	60.367	133.526
2020-09-14	E	367.506	59.4329	131.096
2020-09-15	E	354.338	57.2595	126.791
2020-09-16	E	346.718	55.9447	123.799
2020-09-17	E	330.854	53.2849	118.737
2020-09-18	E	316.922	50.7606	113.827
2020-09-19	E	307.314	49.2421	110.445
2020-09-20	E	301.746	48.3512	108.071
2020-09-21	E	297.306	47.6919	106.123
2020-09-22	E	282.167	45.0043	101.078
2020-09-23	E	275.191	44.1512	98.8302
2020-09-24	E	264.211	42.234	94.9785
2020-09-25	E	253.133	40.4255	91.2788
2020-09-26	E	250.971	40.2357	90.1
2020-09-27	E	242.452	38.8657	87.1748
2020-09-28	E	228.816	36.4704	82.6566
2020-09-29	E	218.461	34.6491	78.9762
2020-09-30	E	209.919	33.4031	76.1805
2020-02-18	F	0	0	0
2020-02-19	F	0	0	0
2020-02-20	F	0	0	0
2020-02-21	F	0	0	0
2020-02-22	F	0	0	0
2020-02-23	F	0.333333	0.0637867	0.0996667
2020-02-24	F	0.952381	0.191822	0.303875
2020-02-25	F	0.816327	0.159852	0.265891
2020-02-26	F	1.69971	0.32457	0.531654
2020-02-27	F	2.79023	0.536715	0.881198
2020-02-28	F	2.72496	0.511049	0.870715
2020-02-29	F	4.33568	0.819688	1.37721
2020-03-01	F	5.04963	0.89662	1.53872
2020-03-02	F	5.99492	1.06612	1.84472
2020-03-03	F	8.1385	1.49579	2.56313
2020-03-04	F	10.3092	1.88436	3.2394
2020-03-05	F	10.1698	1.82545	3.23314
2020-03-06	F	11.0503	1.9899	3.56133
2020-03-07	F	12.1383	2.17964	3.93083
2020-03-08	F	13.7376	2.35994	4.28881
2020-03-09	F	16.7751	2.9456	5.28238
2020-03-10	F	17.0453	2.99824	5.47141
2020-03-11	F	18.9436	3.26397	5.98349
2020-03-12	F	22.9041	3.99571	7.22889
2020-03-13	F	25.2987	4.45851	8.08894
2020-03-14	F	27.3513	4.81089	8.78949
2020-03-15	F	31.1106	5.52054	10.0525
2020-03-16	F	35.6662	6.23949	11.3569
2020-03-17	F	39.5711	6.84971	12.5156
2020-03-18	F	46.2514	8.13753	14.7472
2020-03-19	F	50.6441	8.76144	15.9978
2020-03-20	F	52.4092	9.0789	16.7757
2020-03-21	F	57.5888	9.95082	18.4054
2020-03-22	F	57.6952	9.96467	18.7177
2020-03-23	F	60.7863	10.5198	19.8404
2020-03-24	F	63.1026	10.8326	20.5887
2020-03-25	F	68.0879	11.7423	22.2574
2020-03-26	F	67.6944	11.6267	22.3526
2020-03-27	F	71.0238	12.2654	23.5842
2020-03-28	F	71.8775	12.3816	24.0118
2020-03-29	F	72.9426	12.5755	24.5377
2020-03-30	F	75.5223	12.9922	25.3965
2020-03-31	F	78.4	13.3589	26.1782
2020-04-01	F	85.2	14.5602	28.262
2020-04-02	F	91.3619	15.7333	30.3539
2020-04-03	F	93.3102	16.0924	31.218
2020-04-04	F	96.6469	16.6025	32.3034
2020-04-05	F	100.174	17.0608	33.3051
2020-04-06	F	102.196	17.4122	34.134
2020-04-07	F	104.264	17.7383	34.9112
2020-04-08	F	102.702	17.4554	34.7247
2020-04-09	F	101.697	17.1226	34.4098
2020-04-10	F	105.169	17.7827	35.5989
2020-04-11	F	105.145	17.7253	35.6903
2020-04-12	F	106.124	17.9355	36.1734
2020-04-13	F	107.297	18.0357	36.479
2020-04-14	F	107.635	18.0527	36.6425
2020-04-15	F	107.259	18.0031	36.6859
2020-04-16	F	106.936	17.8785	36.5938
2020-04-17	F	103.326	17.1341	35.5122
2020-04-18	F	103.565	17.2292	35.6839
2020-04-19	F	103.104	17.278	35.7864
2020-04-20	F	99.3746	16.5504	34.6758
2020-04-21	F	99.1782	16.3906	34.4016
2020-04-22	F	98.6765	16.0661	33.8627
2020-04-23	F	96.5799	15.7319	33.2916
2020-04-24	F	92.7828	14.993	32.0725
2020-04-25	F	90.1948	14.4549	31.1271
2020-04-26	F	87.6431	14.1563	30.5339
2020-04-27	F	87.1227	14.1182	30.3441
2020-04-28	F	85.6766	13.9367	29.9441
2020-04-29	F	84.1037	13.5857	29.2821
2020-04-30	F	79.7556	12.8246	27.9705
2020-05-01	F	81.3619	13.1166	28.2702
2020-05-02	F	78.7388	12.7526	27.5834
2020-05-03	F	76.1571	12.3522	26.8308
2020-05-04	F	73.6108	11.816	25.856
2020-05-05	F	72.7617	11.5828	25.3366
2020-05-06	F	70.3671	11.0584	24.3666
2020-05-07	F	67.9814	10.7601	23.7344
2020-05-08	F	67.6031	10.6918	23.4629
2020-05-09	F	69.6121	11.2422	24.1744
2020-05-10	F	67.0009	10.8272	23.4319
2020-05-11	F	65.096	10.4288	22.6999
2020-05-12	F	64.1299	10.3103	22.3931
2020-05-13	F	61.6352	9.84822	21.557
2020-05-14	F	57.4968	9.14424	20.327
2020-05-15	F	57.6163	9.27033	20.3645
2020-05-16	F	56.7187	9.15354	20.0506
2020-05-17	F	56.9494	9.35574	20.2439
2020-05-18	F	58.1471	9.43549	20.2744
2020-05-19	F	55.1737	8.92787	19.4041
2020-05-20	F	55.9584	9.176	19.6913
2020-05-21	F	56.631	9.2968	19.8082
2020-05-22	F	54.8742	8.99256	19.2778
2020-05-23	F	52.7017	8.54766	18.5148
2020-05-24	F	54.8396	8.95345	19.0604
2020-05-25	F	56.672	9.26111	19.4902
2020-05-26	F	54.2427	8.87961	18.8696
2020-05-27	F	52.4937	8.59221	18.3742
2020-05-28	F	51.6613	8.34162	17.9235
2020-05-29	F	54.9478	9.05908	18.9764
2020-05-30	F	52.7647	8.65579	18.3333
2020-05-31	F	57.2269	9.57604	19.7336
2020-06-01	F	57.7183	9.68286	19.9276
2020-06-02	F	61.1395	10.4014	21.081
2020-06-03	F	61.4053	10.4899	21.2929
2020-06-04	F	61.9664	10.5609	21.4739
2020-06-05	F	67.4474	11.5907	23.149
2020-06-06	F	67.1454	11.3951	22.9681
2020-06-07	F	70.8865	12.0612	24.1054
2020-06-08	F	72.4266	12.4167	24.7885
2020-06-09	F	72.4132	12.3607	24.836
2020-06-10	F	72.7352	12.3334	24.9078
2020-06-11	F	77.0111	13.0761	26.1667
2020-06-12	F	77.3428	13.0156	26.2065
2020-06-13	F	78.2939	13.2092	26.6227
2020-06-14	F	84.109	14.3274	28.4819
2020-06-15	F	88.7601	15.2397	30.0783
2020-06-16	F	92.0801	15.7005	31.0072
2020-06-17	F	99.2591	17.0774	33.3713
2020-06-18	F	101.746	17.3844	34.1269
2020-06-19	F	103.544	17.6569	34.814
2020-06-20	F	114.085	19.5674	38.0456
2020-06-21	F	120.788	20.7241	40.1929
2020-06-22	F	129.199	22.2843	43.0034
2020-06-23	F	134.075	23.0409	44.6133
2020-06-24	F	133.922	22.9919	44.9603
2020-06-25	F	141.123	24.0881	47.0406
2020-06-26	F	153.629	26.3106	50.9062
2020-06-27	F	160.682	27.4916	53.2399
2020-06-28	F	172.061	29.6378	57.0976
2020-06-29	F	179.148	30.7634	59.4374
2020-06-30	F	189.222	32.6111	62.9061
2020-07-01	F	195.19	33.5712	65.0355
2020-07-02	F	205.306	35.1923	68.1814
2020-07-03	F	213.31	36.3212	70.5874
2020-07-04	F	224.504	38.3492	74.3913
2020-07-05	F	236.432	40.5494	78.517
2020-07-06	F	251.989	43.2899	83.5441
2020-07-07	F	258.991	44.4309	86.1574
2020-07-08	F	276.659	47.4757	91.7157
2020-07-09	F	293.469	50.3153	97.0516
2020-07-10	F	310.545	53.3833	102.817
2020-07-11	F	320.182	54.9637	106.336
2020-07-12	F	328.441	56.1837	109.264
2020-07-13	F	347.521	59.4772	115.383
2020-07-14	F	354.875	60.605	118.211
2020-07-15	F	370.845	63.1644	123.216
2020-07-16	F	385.534	65.5275	127.956
2020-07-17	F	404.458	68.936	134.352
2020-07-18	F	415.012	70.6256	138.15
2020-07-19	F	430.391	73.2455	143.367
2020-07-20	F	450.573	76.7072	149.929
2020-07-21	F	464.539	79.1372	154.961
2020-07-22	F	477.843	81.4312	159.784
2020-07-23	F	495.913	84.2719	165.455
2020-07-24	F	516.735	87.9482	172.463
2020-07-25	F	531.249	90.4405	177.703
2020-07-26	F	550.69	93.9012	184.45
2020-07-27	F	562.02	95.3764	188.152
2020-07-28	F	584.731	99.4428	195.824
2020-07-29	F	613.531	104.443	205.055
2020-07-30	F	633.217	107.755	211.798
2020-07-31	F	643.091	109.459	216.046
2020-08-01	F	659.554	112.113	221.692
2020-08-02	F	671.999	114.363	226.693
2020-08-03	F	684.999	116.23	231.056
2020-08-04	F	698.809	118.288	235.657
2020-08-05	F	722.312	122.241	243.181
2020-08-06	F	740.125	125.441	249.617
2020-08-07	F	762.726	129.497	257.419
2020-08-08	F	770.098	130.569	260.64
2020-08-09	F	786.418	133.091	266.003
2020-08-10	F	790.406	133.468	268
2020-08-11	F	801.824	135.243	272.031
2020-08-12	F	799.278	134.337	271.831
2020-08-13	F	811.762	136.639	276.432
2020-08-14	F	824.796	138.764	280.783
2020-08-15	F	847.635	142.968	288.39
2020-08-16	F	852.544	143.584	290.535
2020-08-17	F	859.085	144.533	293.093
2020-08-18	F	864.025	145.08	294.949
2020-08-19	F	856.593	143.666	293.653
2020-08-20	F	855.223	143.378	293.91
2020-08-21	F	856.048	143.138	294.134
2020-08-22	F	852.089	142.187	293.156
2020-08-23	F	853.695	142.337	293.774
2020-08-24	F	841.739	139.628	289.886
2020-08-25	F	837.49	138.962	288.971
2020-08-26	F	825.516	136.937	285.874
2020-08-27	F	816.918	134.914	282.64
2020-08-28	F	813.882	134.133	281.223
2020-08-29	F	806.613	132.635	278.661
2020-08-30	F	791.383	129.777	273.902
2020-08-31	F	787.328	129.141	272.467
2020-09-01	F	778.519	127.769	269.895
2020-09-02	F	759.969	124.417	264.195
2020-09-03	F	747.735	122.49	260.559
2020-09-04	F	742.583	121.591	258.483
2020-09-05	F	723.166	117.722	251.791
2020-09-06	F	705.857	114.63	246.144
2020-09-07	F	684.02	111.039	239.617
2020-09-08	F	666.303	108.269	234.252
2020-09-09	F	647.783	104.914	227.924
2020-09-10	F	629.91	101.736	221.789
2020-09-11	F	619.923	100.364	218.415
2020-09-12	F	599.695	96.7597	211.618
2020-09-13	F	589.691	95.304	208.089
2020-09-14	F	570.116	91.961	201.673
2020-09-15	F	556.005	89.4442	196.48
2020-09-16	F	542.242	87.4384	192.079
2020-09-17	F	519.445	83.5038	184.691
2020-09-18	F	499.572	80.1169	178.059
2020-09-19	F	491.538	79.1498	175.154
2020-09-20	F	473.652	76.1363	169.163
2020-09-21	F	451.654	72.2855	161.828
2020-09-22	F	436.799	69.6173	156.255
2020-09-23	F	415.732	65.9046	149.051
2020-09-24	F	399.675	63.3542	143.598
2020-09-25	F	386.245	61.2649	138.882
2020-09-26	F	374.734	59.4434	134.63
2020-09-27	F	364.201	57.7896	130.697
2020-09-28	F	348.172	55.1635	125.306
2020-09-29	F	336.433	53.3522	121.178
2020-09-30	F	320.705	50.7085	115.794
2020-02-18	G	0	0	0
2020-02-19	G	0	0	0
2020-02-20	G	0	0	0
2020-02-21	G	0	0	0
2020-02-22	G	0	0	0
2020-02-23	G	0	0	0
2020-02-24	G	0.333333	0.0637867	0.0996667
2020-02-25	G	1.28571	0.255609	0.403542
2020-02-26	G	1.43537	0.276794	0.452766
2020-02-27	G	1.89699	0.380422	0.63017
2020-02-28	G	2.29266	0.455685	0.768065
2020-02-29	G	2.6318	0.518404	0.888724
2020-03-01	G	2.25583	0.432003	0.777633
2020-03-02	G	2.60023	0.487576	0.879763
2020-03-03	G	4.22877	0.81122	1.40246
2020-03-04	G	5.29133	1.00604	1.74282
2020-03-05	G	6.53542	1.23218	2.1403
2020-03-06	G	5.93513	1.09061	1.97243
2020-03-07	G	7.08725	1.30265	2.34121
2020-03-08	G	8.40812	1.54314	2.76356
2020-03-09	G	11.207	2.08467	3.66611
2020-03-10	G	10.9393	1.93968	3.52418
2020-03-11	G	12.0432	2.12669	3.88099
2020-03-12	G	14.6561	2.63475	4.74354
2020-03-13	G	15.5624	2.79189	5.08226
2020-03-14	G	18.3392	3.30556	5.97664
2020-03-15	G	20.0526	3.60605	6.5599
2020-03-16	G	20.8546	3.72888	6.87091
2020-03-17	G	23.2087	4.19455	7.71071
2020-03-18	G	22.2265	3.90036	7.37954
2020-03-19	G	26.0513	4.5399	8.4721
2020-03-20	G	27.663	4.72064	8.87775
2020-03-21	G	31.0445	5.31776	9.93037
2020-03-22	G	31.6096	5.35776	10.1364
2020-03-23	G	35.0939	6.03173	11.3177
2020-03-24	G	36.7472	6.36874	12.0003
2020-03-25	G	37.8309	6.54141	12.4286
2020-03-26	G	37.0932	6.37747	12.3224
2020-03-27	G	38.7941	6.62357	12.8274
2020-03-28	G	41.9188	7.23356	13.902
2020-03-29	G	43.5971	7.51725	14.4912
2020-03-30	G	49.7022	8.62726	16.3718
2020-03-31	G	47.6019	8.17946	15.8723
2020-04-01	G	48.4683	8.36096	16.302
2020-04-02	G	50.2109	8.6287	16.8599
2020-04-03	G	51.3713	8.85181	17.3481
2020-04-04	G	54.6992	9.50643	18.5076
2020-04-05	G	57.5517	10.0187	19.4701
2020-04-06	G	58.9967	10.2985	20.0827
2020-04-07	G	61.2353	10.6261	20.766
2020-04-08	G	61.8207	10.6355	20.9523
2020-04-09	G	63.6558	10.8958	21.5096
2020-04-10	G	63.2288	10.8381	21.5682
2020-04-11	G	63.1961	10.779	21.6022
2020-04-12	G	61.8348	10.5161	21.2982
2020-04-13	G	62.0012	10.4995	21.3486
2020-04-14	G	59.8106	10.0475	20.708
2020-04-15	G	60.2662	10.1728	20.9319
2020-04-16	G	57.6568	9.681	20.1961
2020-04-17	G	57.4201	9.68712	20.2022
2020-04-18	G	56.2172	9.4038	19.7569
2020-04-19	G	53.8528	8.97634	19.0683
2020-04-20	G	52.4929	8.68391	18.5654
2020-04-21	G	48.6606	7.97153	17.3931
2020-04-22	G	49.7091	8.12113	17.5286
2020-04-23	G	50.2744	8.30403	17.7382
2020-04-24	G	50.4257	8.38989	17.8176
2020-04-25	G	51.5554	8.56683	18.0517
2020-04-26	G	49.5237	8.19289	17.4419
2020-04-27	G	50.1155	8.38325	17.6927
2020-04-28	G	46.6228	7.72098	16.6294
2020-04-29	G	47.9624	8.0094	17.0121
2020-04-30	G	45.7773	7.52591	16.2159
2020-05-01	G	46.9044	7.65549	16.3513
2020-05-02	G	46.2037	7.5832	16.188
2020-05-03	G	43.6032	7.15133	15.4645
2020-05-04	G	41.7075	6.75816	14.7795
2020-05-05	G	41.0826	6.73004	14.648
2020-05-06	G	37.547	6.06597	13.532
2020-05-07	G	37.1832	5.87588	13.1232
2020-05-08	G	37.8713	6.01422	13.2291
2020-05-09	G	38.4611	6.15169	13.3565
2020-05-10	G	35.9667	5.71158	12.6013
2020-05-11	G	35.8286	5.66376	12.4388
2020-05-12	G	34.7102	5.47692	12.0669
2020-05-13	G	33.4183	5.22415	11.5899
2020-05-14	G	33.3109	5.29085	11.6058
2020-05-15	G	32.8855	5.28264	11.5201
2020-05-16	G	32.5209	5.26471	11.4277
2020-05-17	G	31.2084	4.98352	10.9309
2020-05-18	G	30.0834	4.81299	10.5959
2020-05-19	G	29.1191	4.68197	10.3201
2020-05-20	G	30.9592	5.09417	10.8934
2020-05-21	G	29.5365	4.84141	10.4634
2020-05-22	G	26.9837	4.28966	9.55414
2020-05-23	G	26.1288	4.14047	9.24387
2020-05-24	G	28.0628	4.52645	9.76972
2020-05-25	G	29.7205	4.837	10.2125
2020-05-26	G	27.8081	4.48843	9.65094
2020-05-27	G	27.5021	4.43369	9.52791
2020-05-28	G	27.5733	4.50456	9.60225
2020-05-29	G	26.9676	4.39167	9.39864
2020-05-30	G	26.4484	4.30868	9.23781
2020-05-31	G	29.67	5.00774	10.2974
2020-06-01	G	31.7648	5.39616	10.9212
2020-06-02	G	30.5603	5.09306	10.4878
2020-06-03	G	31.5279	5.28699	10.8061
2020-06-04	G	32.3572	5.407	11.0197
2020-06-05	G	34.0681	5.73997	11.5706
2020-06-06	G	33.5346	5.63472	11.4546
2020-06-07	G	33.4106	5.59971	11.4354
2020-06-08	G	34.971	5.92274	11.969
2020-06-09	G	37.3085	6.39439	12.7522
2020-06-10	G	38.9787	6.67095	13.2555
2020-06-11	G	42.077	7.19817	14.1596
2020-06-12	G	44.3993	7.63751	14.9506
2020-06-13	G	47.7232	8.16449	15.8941
2020-06-14	G	49.9056	8.60363	16.7197
2020-06-15	G	53.1096	9.09716	17.6414
2020-06-16	G	58.5225	10.1907	19.5139
2020-06-17	G	64.4955	11.2045	21.3127
2020-06-18	G	65.2818	11.2646	21.6602
2020-06-19	G	64.9559	11.1233	21.6654
2020-06-20	G	66.3431	11.2274	22.0165
2020-06-21	G	66.5322	11.1449	22.0595
2020-06-22	G	68.0276	11.3841	22.578
2020-06-23	G	71.6427	12.1602	23.9331
2020-06-24	G	76.7414	13.1038	25.5825
2020-06-25	G	81.7783	14.1147	27.3767
2020-06-26	G	86.429	14.8933	28.8469
2020-06-27	G	91.4154	15.8084	30.5494
2020-06-28	G	95.356	16.4407	31.8354
2020-06-29	G	100.734	17.3836	33.6106
2020-06-30	G	111.01	19.1926	36.763
2020-07-01	G	114.818	19.8682	38.2213
2020-07-02	G	119.415	20.5255	39.6446
2020-07-03	G	125.023	21.467	41.5054
2020-07-04	G	128.496	22.0215	42.7739
2020-07-05	G	138.472	23.8424	46.0071
2020-07-06	G	145.691	25.052	48.3552
2020-07-07	G	154.878	26.709	51.4238
2020-07-08	G	154.086	26.3787	51.4352
2020-07-09	G	162.407	27.8146	54.1188
2020-07-10	G	173.539	29.9485	57.9316
2020-07-11	G	177.415	30.5259	59.3915
2020-07-12	G	186.07	31.9223	62.0989
2020-07-13	G	190.488	32.5535	63.6359
2020-07-14	G	197.609	33.7479	66.025
2020-07-15	G	205.379	35.0732	68.6312
2020-07-16	G	220.039	37.6447	73.204
2020-07-17	G	231.605	39.8016	77.2268
2020-07-18	G	239.185	40.6421	79.2518
2020-07-19	G	249.683	42.4907	82.8177
2020-07-20	G	258.68	43.5209	85.1405
2020-07-21	G	268.059	45.0589	88.2346
2020-07-22	G	267.765	44.8735	88.6496
2020-07-23	G	277.513	46.6658	92.0547
2020-07-24	G	294.535	49.9399	97.8162
2020-07-25	G	299.792	50.9322	100.145
2020-07-26	G	312.631	52.8296	103.855
2020-07-27	G	316.636	53.6177	105.862
2020-07-28	G	329.736	55.8246	110.041
2020-07-29	G	338.631	57.3698	113.238
2020-07-30	G	350.588	59.4784	117.318
2020-07-31	G	366.504	62.245	122.465
2020-08-01	G	377.48	64.1761	126.384
2020-08-02	G	385.221	65.0671	128.69
2020-08-03	G	386.856	65.2188	129.786
2020-08-04	G	388.924	65.2898	130.658
2020-08-05	G	409.363	68.9737	137.084
2020-08-06	G	410.55	68.9625	137.893
2020-08-07	G	416.566	69.7768	139.888
2020-08-08	G	422.39	70.8492	142.248
2020-08-09	G	431.382	72.206	145.038
2020-08-10	G	446.423	75.0867	150.213
2020-08-11	G	448.981	75.4987	151.634
2020-08-12	G	449.175	75.2431	151.941
2020-08-13	G	453.673	76.0645	153.826
2020-08-14	G	451.53	75.7395	153.899
2020-08-15	G	451.692	75.4548	153.94
2020-08-16	G	457.165	76.6957	156.287
2020-08-17	G	468.855	78.5563	159.631
2020-08-18	G	472.209	78.9697	160.78
2020-08-19	G	485.751	81.2029	164.737
2020-08-20	G	482.025	80.2961	163.875
2020-08-21	G	484.497	80.3141	164.329
2020-08-22	G	482.617	80.1517	164.449
2020-08-23	G	480.671	79.8361	164.273
2020-08-24	G	477.337	79.4261	163.889
2020-08-25	G	479.146	79.3007	163.891
2020-08-26	G	481.697	79.5762	164.486
2020-08-27	G	477.216	78.9211	163.624
2020-08-28	G	471.376	78.0035	162.29
2020-08-29	G	468.703	77.6188	161.716
2020-08-30	G	459.079	75.7979	158.87
2020-08-31	G	462.163	76.2827	159.508
2020-09-01	G	450.14	74.0688	155.975
2020-09-02	G	446.501	73.5329	154.93
2020-09-03	G	437.715	72.0878	152.455
2020-09-04	G	434.851	71.4522	151.178
2020-09-05	G	422.396	69.1253	147.252
2020-09-06	G	416.72	68.2679	145.507
2020-09-07	G	413.522	67.8585	144.457
2020-09-08	G	407.781	66.7712	142.373
2020-09-09	G	398.86	65.072	139.309
2020-09-10	G	390.88	63.6699	136.651
2020-09-11	G	385.707	62.8093	134.805
2020-09-12	G	370.939	60.1979	130.231
2020-09-13	G	366.281	59.6414	128.759
2020-09-14	G	355.288	57.5275	124.893
2020-09-15	G	337.533	54.5096	119.547
2020-09-16	G	327.647	52.7629	116.07
2020-09-17	G	315.841	50.6861	112.056
2020-09-18	G	306.72	49.083	108.744
2020-09-19	G	298.903	48.0078	106.253
2020-09-20	G	288.536	46.13	102.539
2020-09-21	G	279.983	44.5402	99.2509
2020-09-22	G	273.319	43.6564	97.0625
2020-09-23	G	263.607	41.9048	93.5617
2020-09-24	G	257.615	41.0553	91.4518
2020-09-25	G	248.48	39.5154	88.3057
2020-09-26	G	234.316	37.1116	83.8021
2020-09-27	G	226.842	36.057	81.3435
2020-09-28	G	220.436	35.131	79.1186
2020-09-29	G	213.945	34.1625	76.8641
2020-09-30	G	207.715	33.1945	74.6401
2020-02-18	H	0	0	0
2020-02-19	H	0	0	0
2020-02-20	H	0	0	0
2020-02-21	H	0	0	0
2020-02-22	H	0	0	0
2020-02-23	H	0	0	0
2020-02-24	H	0	0	0
2020-02-25	H	0	0	0
2020-02-26	H	0.333333	0.07488	0.117
2020-02-27	H	0.285714	0.0624	0.102375
2020-02-28	H	0.578231	0.115787	0.189245
2020-02-29	H	1.16229	0.171369	0.282589
2020-03-01	H	0.996252	0.142807	0.247266
2020-03-02	H	1.5206	0.257673	0.433024
2020-03-03	H	1.6367	0.278514	0.478563
2020-03-04	H	2.73622	0.498335	0.834742
2020-03-05	H	3.34533	0.617733	1.04673
2020-03-06	H	3.53409	0.64235	1.11522
2020-03-07	H	4.02922	0.726652	1.27482
2020-03-08	H	5.45362	0.988263	1.71347
2020-03-09	H	5.3412	0.951126	1.69862
2020-03-10	H	6.57817	1.14482	2.03662
2020-03-11	H	7.3051	1.29514	2.31505
2020-03-12	H	8.59485	1.53688	2.74067
2020-03-13	H	8.70034	1.54697	2.81408
2020-03-14	H	8.79077	1.55538	2.87832
2020-03-15	H	9.86828	1.76485	3.25087
2020-03-16	H	11.1252	1.99209	3.65917
2020-03-17	H	12.8692	2.27853	4.16811
2020-03-18	H	15.6974	2.77238	5.0121
2020-03-19	H	15.1216	2.62925	4.88392
2020-03-20	H	16.9614	2.91488	5.40443
2020-03-21	H	16.5383	2.82288	5.34421
2020-03-22	H	17.509	3.02355	5.72485
2020-03-23	H	18.6744	3.27674	6.19224
2020-03-24	H	22.0066	3.93424	7.29888
2020-03-25	H	23.1962	4.05507	7.59985
2020-03-26	H	23.2158	4.06147	7.71587
2020-03-27	H	22.5659	3.90594	7.56605
2020-03-28	H	23.0089	3.98988	7.76863
2020-03-29	H	27.0552	4.78368	9.07689
2020-03-30	H	29.5235	5.25381	9.92261
2020-03-31	H	31.6392	5.57071	10.5456
2020-04-01	H	33.1193	5.85698	11.1254
2020-04-02	H	36.0547	6.41447	12.1311
2020-04-03	H	36.5707	6.51851	12.4477
2020-04-04	H	37.3463	6.62463	12.7551
2020-04-05	H	37.6778	6.66036	12.9417
2020-04-06	H	38.6286	6.80662	13.287
2020-04-07	H	38.4435	6.77042	13.3421
2020-04-08	H	36.6183	6.38805	12.84
2020-04-09	H	36.7204	6.37724	12.8817
2020-04-10	H	37.4746	6.5069	13.1348
2020-04-11	H	36.1211	6.21004	12.7236
2020-04-12	H	35.2943	5.97376	12.3812
2020-04-13	H	35.2523	5.9793	12.3978
2020-04-14	H	32.8829	5.52633	11.6974
2020-04-15	H	31.1853	5.20154	11.1669
2020-04-16	H	31.0636	5.17494	11.0841
2020-04-17	H	32.2926	5.42178	11.4319
2020-04-18	H	32.0127	5.43612	11.4372
2020-04-19	H	31.4395	5.35101	11.2903
2020-04-20	H	30.6148	5.2052	11.0446
2020-04-21	H	29.9079	5.0726	10.8124
2020-04-22	H	28.9687	4.86781	10.4618
2020-04-23	H	28.497	4.80253	10.3198
2020-04-24	H	27.7593	4.58728	9.94414
2020-04-25	H	27.4604	4.49388	9.74979
2020-04-26	H	26.2041	4.27738	9.36307
2020-04-27	H	25.1273	4.11915	9.05935
2020-04-28	H	25.2044	4.15647	9.05793
2020-04-29	H	23.6038	3.87972	8.57569
2020-04-30	H	24.8985	4.19268	9.00306
2020-05-01	H	25.3415	4.16504	8.92634
2020-05-02	H	24.7213	4.06714	8.74222
2020-05-03	H	23.8564	3.93285	8.49877
2020-05-04	H	23.7816	3.97071	8.51976
2020-05-05	H	23.7176	3.90519	8.38646
2020-05-06	H	22.6627	3.73411	8.08782
2020-05-07	H	22.0918	3.59155	7.82651
2020-05-08	H	21.9359	3.6225	7.83186
2020-05-09	H	21.4688	3.55123	7.68488
2020-05-10	H	20.7352	3.43915	7.47393
2020-05-11	H	21.1064	3.45113	7.45403
2020-05-12	H	20.7578	3.39733	7.33694
2020-05-13	H	18.7924	3.04465	6.75349
2020-05-14	H	17.1078	2.66478	6.10864
2020-05-15	H	16.3305	2.57287	5.89539
2020-05-16	H	15.6642	2.46299	5.6568
2020-05-17	H	15.4265	2.47958	5.61703
2020-05-18	H	14.8894	2.40744	5.4479
2020-05-19	H	14.429	2.34732	5.29992
2020-05-20	H	13.701	2.22234	5.05343
2020-05-21	H	13.4104	2.17088	4.92008
2020-05-22	H	11.828	1.80907	4.30507
2020-05-23	H	13.1383	1.96516	4.48194
2020-05-24	H	12.928	1.96766	4.43736
2020-05-25	H	13.4145	2.09732	4.59769
2020-05-26	H	13.8315	2.22755	4.77265
2020-05-27	H	13.1889	2.14472	4.62673
2020-05-28	H	12.9714	2.1062	4.54672
2020-05-29	H	13.1184	2.18226	4.64572
2020-05-30	H	12.5776	2.0737	4.46367
2020-05-31	H	12.7808	2.05811	4.42138
2020-06-01	H	12.2883	1.99242	4.30204
2020-06-02	H	12.5329	2.06526	4.39695
2020-06-03	H	13.4091	2.24244	4.662
2020-06-04	H	13.4935	2.2736	4.71192
2020-06-05	H	15.8992	2.75718	5.47059
2020-06-06	H	15.9612	2.75525	5.50177
2020-06-07	H	17.0144	2.89231	5.74571
2020-06-08	H	18.5838	3.22007	6.29283
2020-06-09	H	19.2623	3.34344	6.53756
2020-06-10	H	18.1772	3.12732	6.25337
2020-06-11	H	18.2471	3.08589	6.22136
2020-06-12	H	19.307	3.28432	6.55736
2020-06-13	H	20.8822	3.58835	7.06802
2020-06-14	H	22.2324	3.8417	7.51485
2020-06-15	H	26.3897	4.6491	8.8375
2020-06-16	H	26.953	4.73676	9.08048
2020-06-17	H	29.1026	5.15092	9.82608
2020-06-18	H	29.9451	5.32689	10.2142
2020-06-19	H	34.0006	6.06702	11.4811
2020-06-20	H	34.1433	6.03484	11.5756
2020-06-21	H	36.2657	6.42402	12.3083
2020-06-22	H	35.4182	6.23804	12.1521
2020-06-23	H	38.6918	6.8485	13.2114
2020-06-24	H	40.4977	7.15476	13.822
2020-06-25	H	39.379	6.8775	13.5242
2020-06-26	H	41.4201	7.28709	14.2647
2020-06-27	H	45.503	7.94735	15.411
2020-06-28	H	49.6692	8.73053	16.7779
2020-06-29	H	51.5736	9.00045	17.376
2020-06-30	H	52.5393	9.13942	17.765
2020-07-01	H	59.0337	10.3008	19.7391
2020-07-02	H	57.9336	10.0649	19.5857
2020-07-03	H	56.9907	9.84622	19.4168
2020-07-04	H	61.1825	10.6097	20.7467
2020-07-05	H	66.4422	11.5454	22.3784
2020-07-06	H	71.2838	12.4638	24.0227
2020-07-07	H	72.767	12.5359	24.3782
2020-07-08	H	77.7051	13.3835	25.9199
2020-07-09	H	79.271	13.5907	26.489
2020-07-10	H	81.9466	14.1155	27.5372
2020-07-11	H	89.9066	15.5735	30.049
2020-07-12	H	94.7295	16.4169	31.6662
2020-07-13	H	95.53	16.5012	32.1149
2020-07-14	H	96.5495	16.5937	32.5422
2020-07-15	H	103.09	17.8633	34.7795
2020-07-16	H	106.696	18.5607	36.1737
2020-07-17	H	113.787	19.8769	38.542
2020-07-18	H	119.865	20.921	40.5319
2020-07-19	H	123.742	21.461	41.7574
2020-07-20	H	130.398	22.621	43.9391
2020-07-21	H	131.103	22.6725	44.418
2020-07-22	H	139.374	24.2075	47.1684
2020-07-23	H	141.13	24.2719	47.677
2020-07-24	H	145.302	25.0383	49.2358
2020-07-25	H	145.211	24.8561	49.3169
2020-07-26	H	150.8	25.93	51.3033
2020-07-27	H	156.257	26.9553	53.2451
2020-07-28	H	164.601	28.3644	55.8108
2020-07-29	H	172.087	29.73	58.3548
2020-07-30	H	175.17	30.2163	59.5624
2020-07-31	H	181.812	31.2372	61.5811
2020-08-01	H	181.172	31.0785	61.7701
2020-08-02	H	187.291	32.1914	63.8812
2020-08-03	H	191.201	32.8637	65.3297
2020-08-04	H	193.22	33.1356	66.1465
2020-08-05	H	196.617	33.6838	67.3639
2020-08-06	H	200.862	34.4818	68.962
2020-08-07	H	203.835	34.8999	69.9748
2020-08-08	H	208.382	35.792	71.7103
2020-08-09	H	214.946	36.7877	73.6232
2020-08-10	H	219.906	37.6508	75.3489
2020-08-11	H	227.491	39.0855	77.977
2020-08-12	H	230.326	39.4297	78.9462
2020-08-13	H	236.422	40.3849	80.8386
2020-08-14	H	244.981	41.7883	83.4434
2020-08-15	H	249.317	42.5029	85.012
2020-08-16	H	251.7	42.774	85.8775
2020-08-17	H	250.743	42.3093	85.5558
2020-08-18	H	254.256	42.8345	86.7
2020-08-19	H	257.6	43.5024	88.0608
2020-08-20	H	255.467	42.9912	87.5832
2020-08-21	H	259.972	43.8853	89.228
2020-08-22	H	268.166	45.2904	91.6985
2020-08-23	H	265.857	44.717	91.1345
2020-08-24	H	268.211	45.0156	91.8544
2020-08-25	H	269.228	45.0842	92.2026
2020-08-26	H	271.434	45.5546	93.1529
2020-08-27	H	272.991	45.733	93.6508
2020-08-28	H	276.992	46.442	94.9618
2020-08-29	H	278.422	46.6861	95.5672
2020-08-30	H	278.647	46.6565	95.733
2020-08-31	H	284.507	47.8355	97.7587
2020-09-01	H	278.53	46.5716	96.0212
2020-09-02	H	279.74	46.6915	96.3339
2020-09-03	H	276.777	45.7958	95.0518
2020-09-04	H	278.237	46.2474	95.802
2020-09-05	H	270.156	44.6408	93.3601
2020-09-06	H	264.229	43.7291	91.8907
2020-09-07	H	262.482	43.341	91.1857
2020-09-08	H	258.985	42.7985	90.2265
2020-09-09	H	253.987	41.9359	88.7459
2020-09-10	H	244.37	40.2492	85.938
2020-09-11	H	241.126	39.8032	84.9804
2020-09-12	H	238.013	39.2096	83.7958
2020-09-13	H	234.345	38.6596	82.6727
2020-09-14	H	230.867	38.0209	81.4083
2020-09-15	H	226.219	37.1808	79.8209
2020-09-16	H	227.902	37.7787	80.46
2020-09-17	H	223.345	37.0095	79.0388
2020-09-18	H	226.772	37.8273	80.0746
2020-09-19	H	230.042	38.6724	81.2366
2020-09-20	H	225.512	37.6488	79.5537
2020-09-21	H	213.296	35.3288	75.7888
2020-09-22	H	206.492	34.1359	73.6516
2020-09-23	H	206.66	34.1846	73.4108
2020-09-24	H	203.137	33.6428	72.2901
2020-09-25	H	198.117	32.6366	70.4428
2020-09-26	H	193.148	31.8398	68.8915
2020-09-27	H	188.889	31.1341	67.469
2020-09-28	H	181.572	29.7778	65.0241
2020-09-29	H	173.966	28.3287	62.3864
2020-09-30	H	167.78	27.2375	60.2604
2020-02-18	I	0	0	0
2020-02-19	I	0	0	0
2020-02-20	I	0	0	0
2020-02-21	I	0.333333	0.0637867	0.0996667
2020-02-22	I	0.285714	0.0531556	0.0872083
2020-02-23	I	0.578231	0.108083	0.175974
2020-02-24	I	0.495627	0.0900691	0.153977
2020-02-25	I	0.424823	0.0750576	0.13473
2020-02-26	I	0.697467	0.126335	0.217555
2020-02-27	I	0.931163	0.169066	0.290028
2020-02-28	I	0.798139	0.140888	0.253774
2020-02-29	I	0.684119	0.117407	0.222052
2020-03-01	I	1.58639	0.225412	0.393629
2020-03-02	I	2.69309	0.454084	0.760426
2020-03-03	I	3.30837	0.580856	0.981706
2020-03-04	I	4.50241	0.814074	1.37466
2020-03-05	I	5.52588	0.944635	1.61883
2020-03-06	I	5.73646	0.989649	1.73281
2020-03-07	I	6.91697	1.21852	2.13154
2020-03-08	I	8.92883	1.52573	2.66243
2020-03-09	I	12.32	2.15613	3.71196
2020-03-10	I	12.8933	2.25438	3.96296
2020-03-11	I	14.3847	2.4971	4.43393
2020-03-12	I	15.3298	2.67718	4.81135
2020-03-13	I	17.8065	3.15728	5.65727
2020-03-14	I	17.9294	3.14136	5.74744
2020-03-15	I	17.7013	3.06431	5.72668
2020-03-16	I	18.8393	3.21364	6.04218
2020-03-17	I	20.8146	3.58214	6.69957
2020-03-18	I	22.5077	3.9336	7.34413
2020-03-19	I	25.959	4.59811	8.48878
2020-03-20	I	28.2506	4.94941	9.17401
2020-03-21	I	31.2148	5.44461	10.0899
2020-03-22	I	34.7555	6.02646	11.1557
2020-03-23	I	36.4571	6.31165	11.7762
2020-03-24	I	39.9156	6.94312	12.9345
2020-03-25	I	41.8801	7.31959	13.714
2020-03-26	I	43.8972	7.75256	14.5825
2020-03-27	I	45.2928	7.98303	15.1387
2020-03-28	I	45.8224	8.04751	15.426
2020-03-29	I	45.6097	7.83501	15.2614
2020-03-30	I	46.4274	7.91306	15.5161
2020-03-31	I	48.4616	8.32201	16.2762
2020-04-01	I	51.2051	8.71271	17.0194
2020-04-02	I	50.5568	8.50582	16.8376
2020-04-03	I	50.3344	8.48317	16.9126
2020-04-04	I	52.8104	8.94408	17.7278
2020-04-05	I	54.2661	9.08135	18.0555
2020-04-06	I	57.8471	9.81419	19.3086
2020-04-07	I	57.5832	9.74265	19.339
2020-04-08	I	58.3571	9.89658	19.6993
2020-04-09	I	60.687	10.2606	20.3829
2020-04-10	I	61.0174	10.3837	20.6994
2020-04-11	I	61.9673	10.5056	21.0066
2020-04-12	I	60.1149	10.097	20.4781
2020-04-13	I	58.1937	9.5956	19.7643
2020-04-14	I	55.547	9.0613	18.9578
2020-04-15	I	56.6117	9.29828	19.3181
2020-04-16	I	53.8576	8.76083	18.485
2020-04-17	I	55.1637	8.97301	18.7874
2020-04-18	I	51.6165	8.26514	17.6696
2020-04-19	I	50.576	8.08015	17.3242
2020-04-20	I	48.0176	7.69303	16.658
2020-04-21	I	44.8246	7.1347	15.7068
2020-04-22	I	43.0877	6.88297	15.2081
2020-04-23	I	40.9323	6.50125	14.5031
2020-04-24	I	40.4182	6.46048	14.3195
2020-04-25	I	38.6442	6.17136	13.7603
2020-04-26	I	37.7902	5.99421	13.3706
2020-04-27	I	38.3916	6.17662	13.5452
2020-04-28	I	38.2404	6.09566	13.3341
2020-04-29	I	38.4442	6.15577	13.3487
2020-04-30	I	38.9522	6.26965	13.4611
2020-05-01	I	37.7209	6.05671	13.0784
2020-05-02	I	34.6655	5.50486	12.1586
2020-05-03	I	33.0467	5.25853	11.6875
2020-05-04	I	33.659	5.42488	11.8559
2020-05-05	I	34.5173	5.533	11.9556
2020-05-06	I	32.9196	5.2071	11.3928
2020-05-07	I	31.5501	4.98821	10.9827
2020-05-08	I	31.7096	5.01935	10.9575
2020-05-09	I	30.513	4.76796	10.5022
2020-05-10	I	29.154	4.59176	10.1557
2020-05-11	I	27.9891	4.29516	9.61859
2020-05-12	I	27.6574	4.22826	9.43027
2020-05-13	I	28.0396	4.35555	9.55148
2020-05-14	I	28.034	4.40616	9.57088
2020-05-15	I	27.3625	4.36513	9.45785
2020-05-16	I	27.7869	4.50012	9.62329
2020-05-17	I	27.8173	4.55991	9.68571
2020-05-18	I	27.5101	4.47107	9.52366
2020-05-19	I	27.2467	4.43864	9.44687
2020-05-20	I	25.6877	4.10377	8.89868
2020-05-21	I	25.6847	4.15474	8.93468
2020-05-22	I	27.0154	4.38858	9.26518
2020-05-23	I	26.4894	4.2756	9.07336
2020-05-24	I	25.0386	4.05388	8.70619
2020-05-25	I	24.1283	3.91072	8.44992
2020-05-26	I	25.0147	3.91898	8.42501
2020-05-27	I	23.4412	3.65963	7.98722
2020-05-28	I	22.4258	3.52948	7.73848
2020-05-29	I	24.2221	3.81483	8.13617
2020-05-30	I	25.7618	4.14692	8.63148
2020-05-31	I	24.0815	3.84958	8.16788
2020-06-01	I	23.9747	3.86804	8.17823
2020-06-02	I	25.2164	4.17184	8.63795
2020-06-03	I	24.9474	4.1255	8.57221
2020-06-04	I	26.0501	4.27823	8.81368
2020-06-05	I	25.9953	4.28904	8.84297
2020-06-06	I	26.9484	4.4367	9.08527
2020-06-07	I	27.7653	4.48488	9.18028
2020-06-08	I	29.1322	4.74967	9.61441
2020-06-09	I	29.3037	4.78728	9.70827
2020-06-10	I	30.7842	5.11815	10.2584
2020-06-11	I	31.7198	5.24411	10.5058
2020-06-12	I	34.5217	5.81777	11.4546
2020-06-13	I	35.2567	5.97689	11.7864
2020-06-14	I	34.8867	5.85434	11.6781
2020-06-15	I	35.9029	6.08224	12.099
2020-06-16	I	36.4406	6.20838	12.3676
2020-06-17	I	38.5681	6.58805	13.0317
2020-06-18	I	40.0584	6.81015	13.4654
2020-06-19	I	39.3357	6.64302	13.2945
2020-06-20	I	41.7164	7.08891	14.0594
2020-06-21	I	47.0902	8.15383	15.812
2020-06-22	I	50.363	8.61416	16.6781
2020-06-23	I	54.1683	9.30839	17.9214
2020-06-24	I	57.43	9.80094	18.8749
2020-06-25	I	57.2257	9.7427	18.9768
2020-06-26	I	59.3839	10.088	19.6814
2020-06-27	I	62.5672	10.6115	20.6662
2020-06-28	I	65.2957	11.0449	21.5236
2020-06-29	I	68.6344	11.6834	22.7072
2020-06-30	I	73.4961	12.5456	24.2584
2020-07-01	I	76.33	12.9895	25.1868
2020-07-02	I	79.7591	13.5702	26.3284
2020-07-03	I	84.3649	14.3231	27.7477
2020-07-04	I	87.9795	14.8396	28.8163
2020-07-05	I	96.0776	16.3488	31.4369
2020-07-06	I	101.019	17.1267	32.9803
2020-07-07	I	103.254	17.3923	33.7327
2020-07-08	I	112.837	19.3386	37.0865
2020-07-09	I	115.384	19.682	38.0233
2020-07-10	I	125.901	21.5212	41.2698
2020-07-11	I	131.915	22.5991	43.3997
2020-07-12	I	138.07	23.7414	45.6447
2020-07-13	I	143.012	24.5962	47.4575
2020-07-14	I	148.582	25.5859	49.477
2020-07-15	I	155.023	26.7185	51.725
2020-07-16	I	155.21	26.6306	52.08
2020-07-17	I	161.704	27.75	54.254
2020-07-18	I	171.603	29.609	57.6036
2020-07-19	I	177.422	30.659	59.7545
2020-07-20	I	181.742	31.3205	61.3029
2020-07-21	I	186.113	31.8274	62.5883
2020-07-22	I	192.525	32.8765	64.6925
2020-07-23	I	202.355	34.6161	67.8856
2020-07-24	I	209.447	35.6386	70.0122
2020-07-25	I	218.526	37.148	72.9
2020-07-26	I	220.308	37.3991	73.8538
2020-07-27	I	229.835	39.0755	76.9808
2020-07-28	I	246.002	42.0588	82.1955
2020-07-29	I	255.859	43.8543	85.6794
2020-07-30	I	268.307	45.7833	89.4038
2020-07-31	I	276.644	47.3324	92.5717
2020-08-01	I	276.791	46.8624	92.5919
2020-08-02	I	280.582	47.3886	94.0439
2020-08-03	I	286.832	48.4983	96.3631
2020-08-04	I	296.856	50.5296	100.121
2020-08-05	I	300.782	50.8052	101.196
2020-08-06	I	307.146	52.0693	103.752
2020-08-07	I	315.935	53.4	106.422
2020-08-08	I	330.801	55.9983	111.085
2020-08-09	I	331.544	56.1639	112.041
2020-08-10	I	334.181	56.5044	113.194
2020-08-11	I	343.774	58.1442	116.322
2020-08-12	I	353.33	59.558	119.132
2020-08-13	I	361.188	61.0217	122.038
2020-08-14	I	367.256	61.9753	124.164
2020-08-15	I	367.124	61.802	124.512
2020-08-16	I	370.011	62.2483	125.74
2020-08-17	I	370.486	62.1266	126.043
2020-08-18	I	370.893	62.1611	126.52
2020-08-19	I	367.575	61.552	125.941
2020-08-20	I	370.731	61.7793	126.583
2020-08-21	I	368.102	61.1062	125.797
2020-08-22	I	367.85	61.2192	126.162
2020-08-23	I	367.633	61.2468	126.377
2020-08-24	I	373.447	62.3348	128.23
2020-08-25	I	374.098	62.4317	128.585
2020-08-26	I	374.322	62.1934	128.398
[truncated: 1,165 more rows]
